# Supplementary material for: Chemoselective hydroborative reduction of nitro motifs using a transition-metal-free catalyst
Source: Royal Society of Chemistry journal article supplement (doi:10.1039/d1qo00705j), 2021-01-01
Supplement: d1qo00705j1.pdf [file d1qo00705j1.pdf]

# Supporting Information For

## Chemoselective hydroborative reduction of nitro motifs using a transition-metal-free catalyst

Wubing Yao,<sup>\*a,b</sup> Jiali Wang,<sup>a,b</sup> Yinpeng Lou,<sup>a</sup> Haijian Wu,<sup>a</sup> Xinxin Qi,<sup>b</sup> Jianguo  
Yang<sup>a,b</sup> and Aiguo Zhong<sup>a</sup>

<sup>a</sup>School of Pharmaceutical and Materials Engineering, Taizhou University, Jiaojiang  
318000, P.R. China

<sup>b</sup>Department of Chemistry, Zhejiang Sci-Tech University, Hangzhou 310018, P.R.  
China

Corresponding author : Wubing Yao

E-mail: icyyw2010@yeah.net

# Table of Contents

|                                                        |     |
|--------------------------------------------------------|-----|
| 1. General considerations .....                        | S3  |
| 2. The typical reaction procedures .....               | S4  |
| 3. The mechanism studies .....                         | S5  |
| 3.1 The free radical experiment .....                  | S5  |
| 3.2 The homogeneous test.....                          | S5  |
| 3.3 The kinetic studies .....                          | S6  |
| 3.4 The plausible mechanism and DFT calculations ..... | S13 |
| 4. NMR spectra data .....                              | S19 |
| 5. References.....                                     | S27 |
| 6. NMR spectra .....                                   | S28 |

## 1. General considerations

### 1.1 Materials

All manipulations were carried out using standard Schlenk, high vacuum, and glovebox techniques. Glassware was dried in a 140 °C oven over 4 h prior to use. KO<sup>t</sup>Bu (95%), BEt<sub>3</sub> (1M solution in THF) and B(C<sub>6</sub>F<sub>5</sub>)<sub>3</sub> (97%) were purchased from Aladdin and used as received. BPh<sub>3</sub> (96%) and HBpin (97%) were purchased from Alfa and used as received. Flash column chromatography was performed on silica gel (particle size 300-400 mesh ASTM), purchased from Yantai, China. All solvents, bases and nitro motifs were obtained from commercial sources and dried and degassed according to standard procedures. All heating reactions were performed on the IKA RCT Basic magnetic stirring apparatus with an oil bath.

### 1.2 Analytical Methods

NMR spectra data were obtained on Avance (III) HD 400 MHz instruments. <sup>1</sup>H NMR and <sup>13</sup>C NMR spectra were referenced to residual protic solvent peaks or TMS signal (0 ppm). <sup>19</sup>F NMR chemical shifts were externally referenced to CCl<sub>3</sub>F (0 ppm). Data for <sup>1</sup>H NMR are recorded as follows: chemical shift (δ, ppm), multiplicity (s = singlet, d = doublet, t = triplet, m = multiplet or unresolved, br = broad singlet, coupling constant (s) in Hz, integration). Data for <sup>13</sup>C NMR are reported in terms of chemical shift (δ, ppm). GC was performed on a Shimadzu GC-2010 plus spectrometer. GC/MS was performed on a Shimadzu GCMS-QP2010 Plus spectrometer.

## 2. The typical reaction procedures

### 2.1 Reduction of nitroarenes

In an argon filled glovebox, a 10 mL dried Schlenk tube equipped with a magnetic stir bar was charged with KO $t$ Bu (5 mol%), BEt<sub>3</sub> (5 mol%), nitro (0.6 mmol), HBpin (6.0 equiv), THF (2.0 mL). The tube was then sealed with a Teflon plug under an argon atmosphere, and removed from the glovebox. Then, the solution was stirred at 100 °C for 24 h. After that, the reaction was quenched by adding 1 M aqueous NaOH (10 mL) at room temperature, and was extracted with Et<sub>2</sub>O (3×30 mL). The filtrate was collected and the corresponding reduced amines were concentrated in vacuum. After that, the crude product was purified by silica gel column chromatography using the EtOAc/petroleum ether mixture.

### 2.2 Reduction of nitro alkanes

In an argon filled glovebox, a 10 mL dried Schlenk tube equipped with a magnetic stir bar was charged with KO $t$ Bu (5 mol%), BEt<sub>3</sub> (5 mol%), nitro (0.6 mmol), HBpin (6.0 equiv), THF (2.0 mL). The tube was then sealed with a Teflon plug under an argon atmosphere, and removed from the glovebox. Then, the solution was stirred at 100 °C for 24 h. After that, the residue was filtrated though Celite. The filtrate was collected and the corresponding reduced amines were concentrated in vacuum. Consequently, 2.0 mL 1 M aqueous HCl was added to the concentrated amines followed by addition of 10 mL Et<sub>2</sub>O, stirring at 25 °C for 6 h. The corresponding amine hydrochloride salt was purified by washing with Et<sub>2</sub>O. Isolated amine hydrochlorides were characterized through NMR spectroscopy in DMSO- $d_6$  or D<sub>2</sub>O.

### 3. The mechanism studies

#### 3.1 The free radical experiment

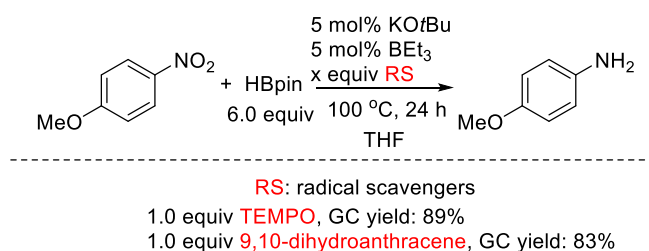

Addition of typical radical scavengers, such as TEMPO and 9, 10-dihydroanthracene, did not obviously effect the reduction transformations, rendering a free radical mechanism unlikely to be operative.

#### 3.2 The homogeneous test

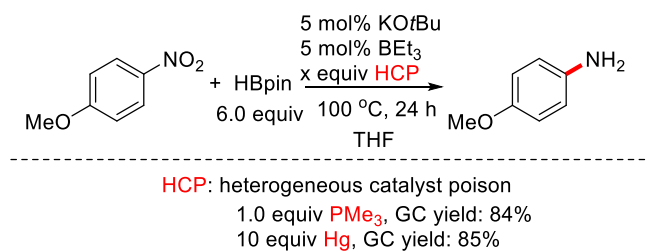

Addition of commonly used heterogeneous catalyst poison PMe<sub>3</sub> or Hg showed no adverse effect on the yield of the product, which indicated that the combined KOtBu/BEt<sub>3</sub> catalyst was likely to be homogeneous under current conditions.

### 3.3 The kinetic studies

#### a. General procedure for typical reaction kinetics

**For the reaction of 1-methoxy-4-nitrobenzene (0.60 mmol), pinacolborane (3.6 mmol) with KO<sup>t</sup>Bu/BEt<sub>3</sub> (0.03 mmol) in 2 ml THF:**

In a glovebox, KO<sup>t</sup>Bu /BEt<sub>3</sub> (3.36 mg, 0.03 mmol) was added to a Schlenk tube equipped with a magnetic stirring bar and a Teflon cap. Then, a mixture of 1-methoxy-4-nitrobenzene (91.9mg, 0.60 mmol) and pinacolborane (460.7 mg, 3.6 mmol) in 2 mL THF was added. The sealed tube was taken out from the glovebox, and was stirred at 100 °C taken out at 5, 10, 15, 20, 25, 30, 40, 60, 90, 120, 180 minutes. The sample was analyzed by GC. The percentage yields of the product **2a** were calculated by *p*-xylene as an internal standard, which were then converted to molar concentrations. A duplicate reaction was also run under otherwise identical conditions and an average value was taken for each time point. The yields in molar concentrations are presented in Table S1. The molar concentrations of the product **2a** were plotted against the reaction time to obtain a typical reaction kinetic profile.

**Table S1.** The molar concentration of product **2a** at different time interval

| Time (s) | Yield of <b>2a</b> (M) |
|----------|------------------------|
| 0        | 0                      |
| 300      | 0.02271                |
| 600      | 0.02765                |
| 900      | 0.03330                |
| 1200     | 0.03715                |
| 1500     | 0.04087                |
| 1800     | 0.04365                |
| 2400     | 0.04769                |
| 3600     | 0.05424                |
| 5400     | 0.05675                |
| 7200     | 0.05906                |
| 10800    | 0.06459                |

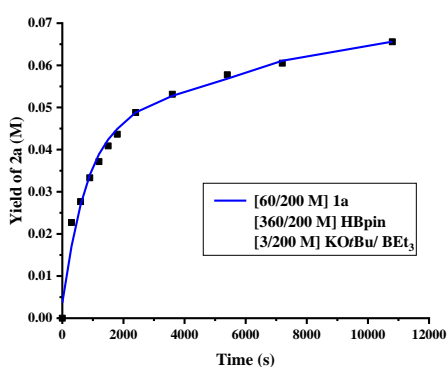

**Figure S1.** Plot of the rise of product **2a** from the reaction of 1-methoxy-4-nitrobenzene (0.60

mmol), pinacolborane (3.60 mmol) with KO<sup>t</sup>Bu/BEt<sub>3</sub> (0.03 mmol) in 2 ml THF. The reaction in different time interval at 100 °C.

**b. General procedure to determine the dependence of reaction rate on the concentration of pinacolborane**

**For the reaction of 1-methoxy-4-nitrobenzene (0.60 mmol), pinacolborane (3.60 mmol) with KO<sup>t</sup>Bu/BEt<sub>3</sub> (0.03 mmol) in 2 ml THF:**

In a glovebox, KO<sup>t</sup>Bu/BEt<sub>3</sub> (3.36 mg, 0.03 mmol) was added to a Schlenk tube equipped with a magnetic stirring bar and a Teflon cap. Then, a mixture of 1-methoxy-4-nitrobenzene (91.9mg, 0.60 mmol) and pinacolborane (460.7 mg, 3.60 mmol) in 2 mL THF was added. The sealed tube was taken out from the glovebox, and was stirred at 100 °C taken out at 5, 10, 15, 20 minutes. The sample was analyzed by GC. The percentage yields of the product **2a** were calculated by *p*-xylene as an internal standard, which were then converted to molar concentrations. A duplicate reaction was also run under otherwise identical conditions and an average value was taken for each time point. The yields in molar concentrations are presented in Table S2. The molar concentrations of the product **2a** were plotted against the reaction time to obtain a typical reaction kinetic profile.

**For the reaction of 1-methoxy-4-nitrobenzene (0.60 mmol), pinacolborane (3.00 mmol) with KO<sup>t</sup>Bu/BEt<sub>3</sub> (0.03 mmol) in 2 ml THF:** The procedure for this reaction was the same as above but instead of pinacolborane (3.60 mmol), pinacolborane (3.00 mmol) were added in the reaction.

**For the reaction of 1-methoxy-4-nitrobenzene (0.60 mmol), pinacolborane (2.40 mmol) with KO<sup>t</sup>Bu/BEt<sub>3</sub> (0.03 mmol) in 2 ml THF:** The procedure for this reaction was the same as above but instead of pinacolborane (3.60 mmol), pinacolborane (2.40 mmol) were added in the reaction.

**For the reaction of 1-methoxy-4-nitrobenzene (0.60 mmol), pinacolborane (1.80 mmol) with KO<sup>t</sup>Bu/BEt<sub>3</sub> (0.03mmol) in 2 ml THF:** The procedure for this reaction was the same as above but instead of pinacolborane (3.60 mmol), pinacolborane (1.80 mmol) were added in the reaction.

The percentage yields of the product **2a** were calculated by *p*-xylene as an internal standard, which were then converted to molar concentrations. A duplicate reaction was also run under otherwise identical conditions and an average value was taken for each time point. The molar concentration of product **2a** was plotted against the reaction time and the slope of linear portion of the curve was used to determine the initial rates of the reaction. The table showing molar concentration of product **2a** in different concentration of pinacolborane, graph showing the rate at different concentration of pinacolborane, table with  $K_{in}$  in value and the graph showing  $K_{in}$  in versus [HBpin] are shown below.

**Table S2.** The molar concentration of product **2a** in different concentration of pinacolborane at different time interval

| Time (s) | HBpin<br>[360/200 M] | HBpin<br>[300/200 M] | HBpin<br>[240/200 M] | HBpin<br>[180/200 M] |
|----------|----------------------|----------------------|----------------------|----------------------|
| 300      | 0.02271              | 0.02201              | 0.02021              | 0.01945              |
| 600      | 0.02765              | 0.02516              | 0.02384              | 0.02139              |
| 900      | 0.03330              | 0.02895              | 0.02639              | 0.02378              |
| 1200     | 0.03715              | 0.03291              | 0.02897              | 0.02535              |

**Table S3.** The  $K_{in}$  value of product **2a** in different concentration of pinacolborane

| HBpin (M) | $K_{in}$ ( $M s^{-1}$ )  |
|-----------|--------------------------|
| 360/200   | $1.59232 \times 10^{-5}$ |
| 300/200   | $1.21653 \times 10^{-5}$ |
| 240/200   | $9.61652 \times 10^{-6}$ |
| 180/200   | $6.69135 \times 10^{-6}$ |

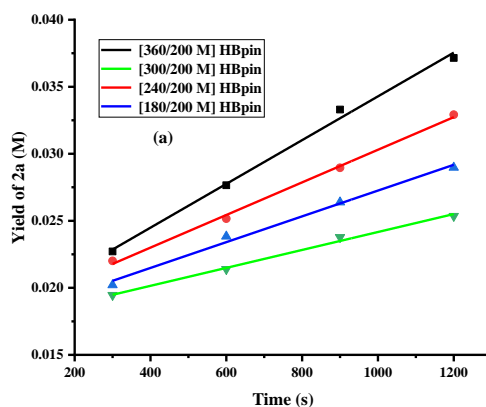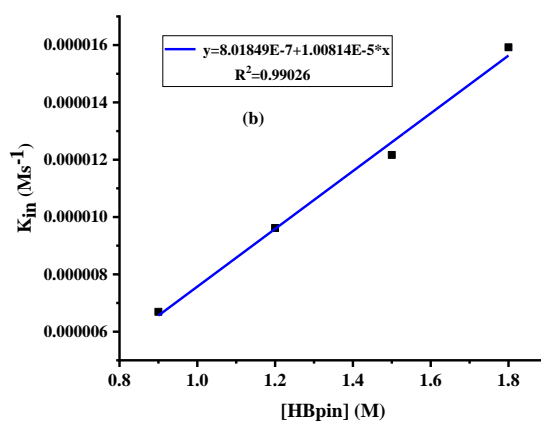

**Figure S2.** (a) Plot of the rise of product **2a** from the reaction of **1a** (0.6 mmol), KO $t$ Bu/BEt $_3$  (0.03 mmol) with 3.60 mmol, 3.00 mmol, 2.40 mmol and 1.80 mmol of pinacolborane in 2 mL THF at different time. (b) Plot of  $K_{in}$  versus [HBpin] from the reaction of **1a** (0.6 mmol), KO $t$ Bu/BEt $_3$  (0.03 mmol) with 3.60 mmol, 3.00 mmol, 2.40 mmol and 1.80 mmol of pinacolborane in 2 mL THF.

**c. General procedure to determine the dependence of reaction rate on the concentration of 1a (1-methoxy-4-nitrobenzene)**

**For the reaction of 1-methoxy-4-nitrobenzene (0.60 mmol), pinacolborane (3.60 mmol) with KO $t$ Bu/BEt $_3$  (0.03 mmol) in 2 ml THF:**

In a glovebox, KO $t$ Bu/BEt $_3$  (3.36 mg, 0.03 mmol) was added to a Schlenk tube equipped with a magnetic stirring bar and a Teflon cap. Then, a mixture of 1-methoxy-4-nitrobenzene (91.9mg, 0.60



mmol) and pinacolborane (460.7 mg, 3.6 mmol) in 2 mL THF was added. The sealed tube was taken out from the glovebox, and was stirred at 100 °C taken out at 5, 10, 15, 20 minutes. The sample was analyzed by GC. The percentage yields of the product **2a** were calculated by *p*-xylene as an internal standard, which were then converted to molar concentrations. A duplicate reaction was also run under otherwise identical conditions and an average value was taken for each time point. The yields in molar concentrations are presented in Table S4. The molar concentrations of the product **2a** were plotted against the reaction time to obtain a typical reaction kinetic profile.

**For the reaction of 1-methoxy-4-nitrobenzene (0.50 mmol), pinacolborane (3.60 mmol) with KO<sup>t</sup>Bu/BEt<sub>3</sub> (0.03 mmol) in 2 ml THF:** The procedure for this reaction was the same as above but instead of 1-methoxy-4-nitrobenzene (0.60mmol), 1-methoxy-4-nitrobenzene (0.50 mmol) were added in the reaction.

**For the reaction of 1-methoxy-4-nitrobenzene (0.40 mmol), pinacolborane (3.60 mmol) with KO<sup>t</sup>Bu/BEt<sub>3</sub> (0.03 mmol) in 2 ml THF:** The procedure for this reaction was the same as above but instead of 1-methoxy-4-nitrobenzene(0.60mmol),1-methoxy-4-nitrobenzene (0.40 mmol) were added in the reaction.

**For the reaction of 1-methoxy-4-nitrobenzene (0.30 mmol), pinacolborane (3.60 mmol) with KO<sup>t</sup>Bu/BEt<sub>3</sub> (0.03 mmol) in 2 ml THF:** The procedure for this reaction was the same as above but instead of 1-methoxy-4-nitrobenzene(0.60mmol), 1-methoxy-4-nitrobenzene (0.30 mmol) were added in the reaction.

The percentage yields of the product **2a** were calculated by *p*-xylene as an internal standard, which were then converted to molar concentrations. A duplicate reaction was also run under otherwise identical conditions and an average value was taken for each time point. The molar concentration of product **2a** was plotted against the reaction time and the slope of linear portion of the curve was used to determine the initial rates of the reaction. The table showing molar concentration of product **2a** in different concentration of 1-methoxy-4-nitrobenzene, graph showing the rate at different concentration of 1-methoxy-4-nitrobenzene, table with  $K_{in}$  in value and the graph showing  $K_{in}$  in versus [1-methoxy-4-nitrobenzene] are shown below.

**Table S4.** The molar concentration of product **2a** in different concentration of 1-methoxy-4-nitrobenzene (**1a**) at different time interval

| Time (s) | <b>1a</b><br>[6/20 M] | <b>1a</b><br>[5/20 M] | <b>1a</b><br>[4/20 M] | <b>1a</b><br>[3/20 M] |
|----------|-----------------------|-----------------------|-----------------------|-----------------------|
| 300      | 0.02271               | 0.02151               | 0.02006               | 0.01924               |
| 600      | 0.02765               | 0.02566               | 0.02369               | 0.02125               |
| 900      | 0.03330               | 0.02875               | 0.02624               | 0.02399               |
| 1200     | 0.03715               | 0.03291               | 0.02805               | 0.02457               |

**Table S5.** The  $K_{in}$  value of product **2a** in different concentration of 1-methoxy-4-nitrobenzene

| <b>1a</b> (M) | $K_{in}$ (Ms <sup>-1</sup> ) |
|---------------|------------------------------|
| 6/20          | $1.63233 \times 10^{-5}$     |
| 5/20          | $1.24276 \times 10^{-5}$     |
| 4/20          | $8.84472 \times 10^{-6}$     |

3/20

 $6.24529 \times 10^{-6}$ 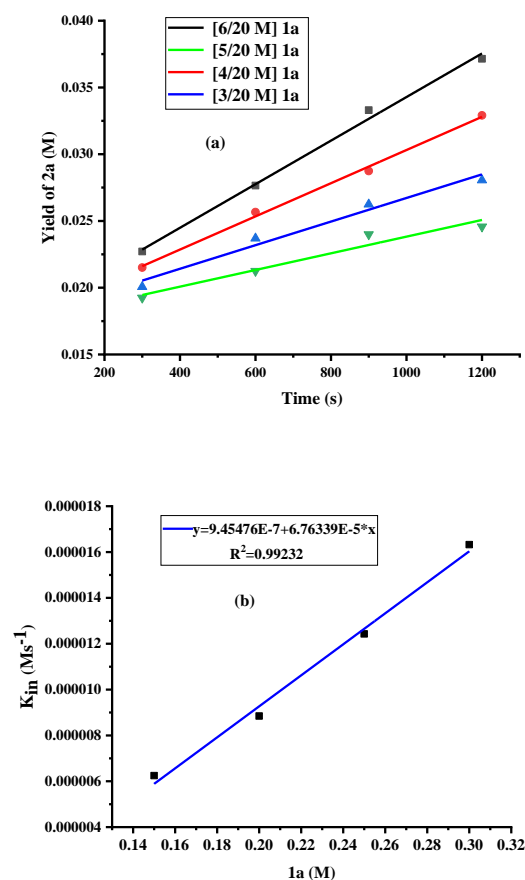

**Figure S3.** (a) Plot of the rise of product **2a** from the reaction of pinacolborane (3.60 mmol) with KOtBu/BEt<sub>3</sub> (0.03 mmol) with 0.30 mmol, 0.40 mmol, 0.50 mmol and 0.60 mmol of 1-methoxy-4-nitrobenzene (**1a**) in 2 mL THF at different time interval. (b) Plot of  $K_{in}$  versus [1-methoxy-4-nitrobenzene] from the reaction of pinacolborane (3.60 mmol), KOtBu/BEt<sub>3</sub> (0.03 mmol) with 0.30 mmol, 0.40 mmol, 0.50 mmol and 0.60 mmol of 1-methoxy-4-nitrobenzene in 2 mL THF.

#### **d. General procedure to determine the dependence of reaction rate on the concentration of catalyst**

##### **For the reaction of 1-methoxy-4-nitrobenzene (0.60 mmol), pinacolborane (3.60 mmol) with KOtBu/BEt<sub>3</sub> (0.03 mmol) in 2 ml THF:**

In a glovebox, KOtBu/BEt<sub>3</sub> (3.36 mg, 0.03 mmol) was added to a Schlenk tube equipped with a magnetic stirring bar and a Teflon cap. Then, a mixture of 1-methoxy-4-nitrobenzene (91.9 mg, 0.60 mmol) and pinacolborane (460.7 mg, 3.6 mmol) in 2 mL THF was added. The sealed tube was taken out from the glovebox, and was stirred at 100 °C taken out at 5, 10, 15, 20 minutes. The sample was analyzed by GC. The percentage yields of the product **2a** were calculated by *p*-xylene as an internal standard, which were then converted to molar concentrations. A duplicate reaction was also run under otherwise identical conditions and an average value was taken for each time point. The yields in molar concentrations are presented in Table S6. The molar concentrations of the product **2a** were plotted against the reaction time to obtain a typical reaction kinetic profile.

**For the reaction of 1-methoxy-4-nitrobenzene (0.6 mmol), pinacolborane (3.60 mmol) with KO<sup>t</sup>Bu/BEt<sub>3</sub> (0.024 mmol) in 2 ml THF:** The procedure for this reaction was the same as above but instead of KO<sup>t</sup>Bu/BEt<sub>3</sub> (0.030 mmol), KO<sup>t</sup>Bu/BEt<sub>3</sub> (0.024 mmol) were added in the reaction.

**For the reaction of 1-methoxy-4-nitrobenzene (0.60mmol), pinacolborane (3.60 mmol) with KO<sup>t</sup>Bu/BEt<sub>3</sub> (0.018 mmol) in 2 ml THF:** The procedure for this reaction was the same as above but instead of KO<sup>t</sup>Bu /BEt<sub>3</sub> (0.030 mmol), KO<sup>t</sup>Bu /BEt<sub>3</sub> (0.018 mmol) were added in the reaction.

**For the reaction of 1-methoxy-4-nitrobenzene (0.60mmol), pinacolborane (3.60 mmol) with KO<sup>t</sup>Bu/BEt<sub>3</sub> (0.012 mmol) in 2 ml THF:** The procedure for this reaction was the same as above but instead of KO<sup>t</sup>Bu /BEt<sub>3</sub> (0.030 mmol), KO<sup>t</sup>Bu/BEt<sub>3</sub> (0.012mol) were added in the reaction.

The percentage yields of the product **2a** were calculated by *p*-xylene as an internal standard, which were then converted to molar concentrations. A duplicate reaction was also run under otherwise identical conditions and an average value was taken for each time point. The molar concentration of product **2a** was plotted against the reaction time and the slope of linear portion of the curve was used to determine the initial rates of the reaction. The table showing molar concentration of product **2a** in different concentration of pinacolborane, graph showing the rate at different concentration of KO<sup>t</sup>Bu/BEt<sub>3</sub>, table with  $K_{in}$  in value and the graph showing  $K_{in}$  in versus KO<sup>t</sup>Bu/BEt<sub>3</sub> are shown below.

**Table S6.** The molar concentration of product **2a** in different concentration of KO<sup>t</sup>Bu/BEt<sub>3</sub> at different time interval

| Time (s) | KO <sup>t</sup> Bu /BEt <sub>3</sub> [30/2000M] | KO <sup>t</sup> Bu /BEt <sub>3</sub> [24/2000M] | KO <sup>t</sup> Bu /BEt <sub>3</sub> [18/2000M] | KO <sup>t</sup> Bu /BEt <sub>3</sub> [12/2000 M] |
|----------|-------------------------------------------------|-------------------------------------------------|-------------------------------------------------|--------------------------------------------------|
| 300      | 0.02271                                         | 0.02109                                         | 0.01946                                         | 0.01846                                          |
| 600      | 0.02765                                         | 0.02551                                         | 0.02259                                         | 0.0198                                           |
| 900      | 0.03330                                         | 0.02861                                         | 0.02585                                         | 0.02291                                          |
| 1200     | 0.03715                                         | 0.03303                                         | 0.02903                                         | 0.02476                                          |

**Table S7.** The  $K_{in}$  value of product **2a** in different concentration of KO<sup>t</sup>Bu /BEt<sub>3</sub>

| KO <sup>t</sup> Bu /BEt <sub>3</sub> (M) | $K_{in}$ (Ms <sup>-1</sup> ) |
|------------------------------------------|------------------------------|
| 30/2000                                  | $1.63233 \times 10^{-5}$     |
| 24/2000                                  | $1.29766 \times 10^{-5}$     |
| 18/2000                                  | $1.06546 \times 10^{-5}$     |
| 12/2000                                  | $7.33618 \times 10^{-6}$     |

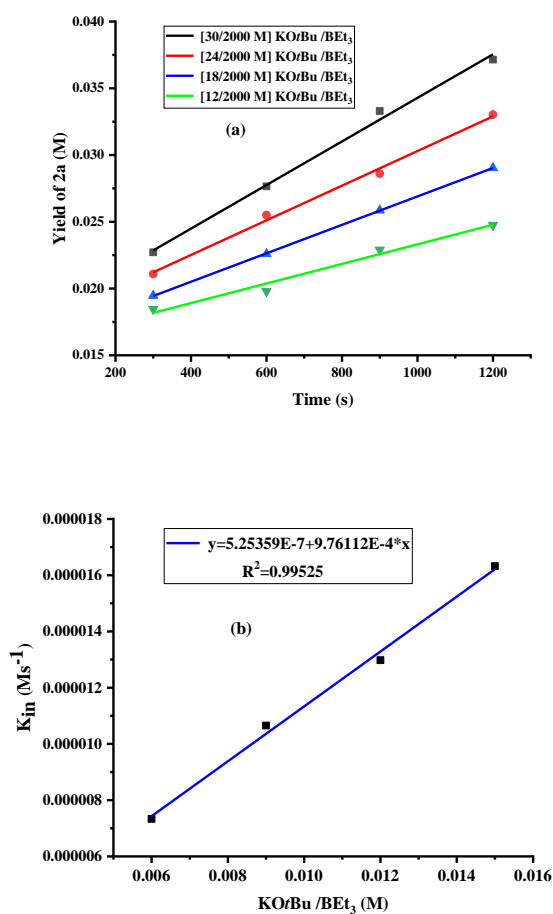

**Figure S4.** (a) Plot of the rise of product **2a** from the reaction of **1a** (0.6 mmol), pinacolborane (3.6 mmol) with 0.012mmol, 0.018mmol, 0.024mmol and 0.030mmol concentration of KOtBu/BEt<sub>3</sub> respectively in different time interval. (b) Plot of  $K_{in}$  versus KOtBu/BEt<sub>3</sub> from the reaction of **1a** (0.6 mmol), pinacolborane (3.6 mmol) with 0.012mmol, 0.018mmol, 0.024mmol and 0.030mmol of KOtBu/BEt<sub>3</sub> in 2mL THF.

### 3.4 The plausible mechanism and DFT calculations

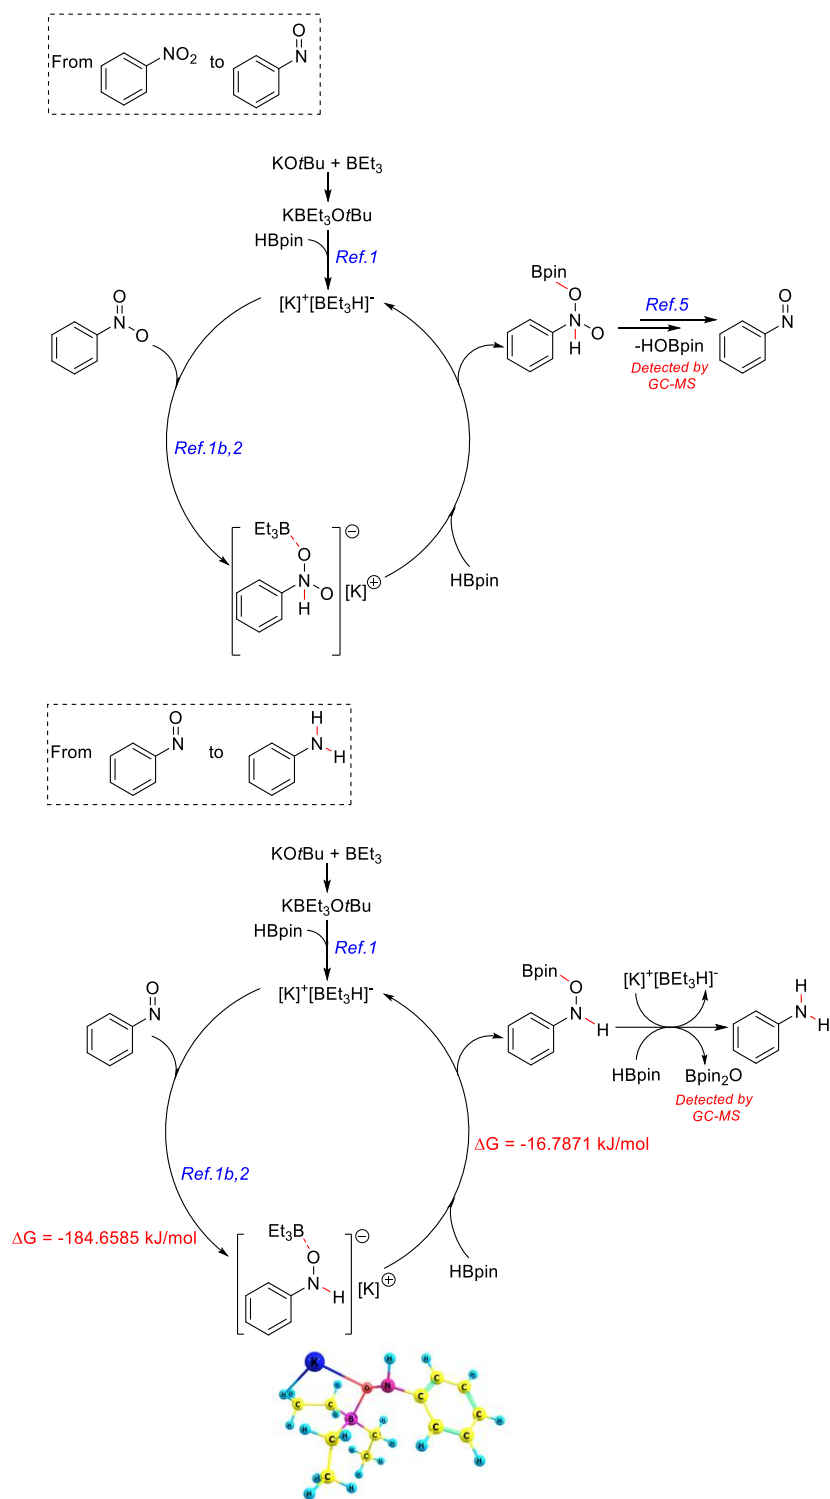

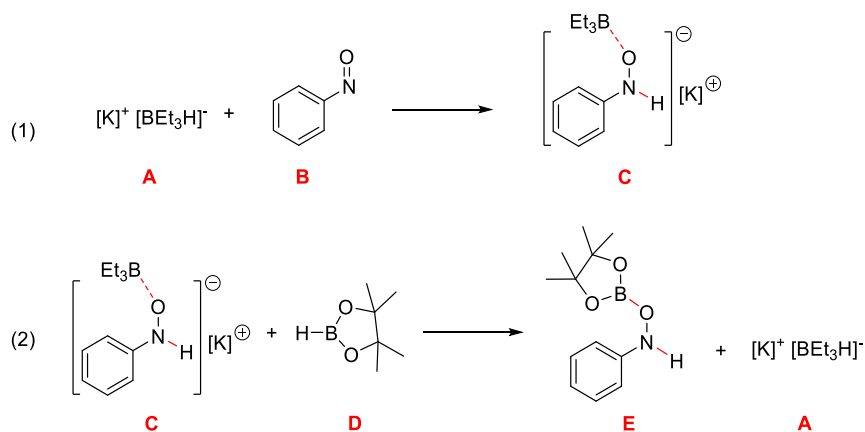

**Table S8** The calculated gibbs free energies of reactions by DFT/B3LYP/6-311+G\*

|               |             |             |             |             |                                       |                                                          |                                                        |
|---------------|-------------|-------------|-------------|-------------|---------------------------------------|----------------------------------------------------------|--------------------------------------------------------|
| <b>Eq (1)</b> | $G_A$ /a.u. | $G_B$ /a.u. | $G_C$ /a.u. |             | $\Delta G_{\text{eq (1)}}$<br>/(a.u.) | $\Delta G_{\text{eq (1)}}$<br>/(kcal.mol <sup>-1</sup> ) | $\Delta G_{\text{eq (1)}}$<br>/(kJ.mol <sup>-1</sup> ) |
|               | -863.1434   | -361.6306   | -1224.8444  |             | -0.0704                               | -44.1767                                                 | <b>-184.6585</b>                                       |
| <b>Eq (2)</b> | $G_C$ /a.u. | $G_D$ /a.u. | $G_E$ /a.u. | $G_A$ /a.u. | $\Delta G_{\text{eq (2)}}$<br>/(a.u.) | $\Delta G_{\text{eq (2)}}$<br>/(kcal.mol <sup>-1</sup> ) | $\Delta G_{\text{eq (2)}}$<br>/(kJ.mol <sup>-1</sup> ) |
|               | -1224.8444  | -411.9700   | -773.6774   | -863.1434   | -0.0064                               | -4.0161                                                  | <b>-16.7871</b>                                        |

(1 a.u. = 627.5095 kcal/mol; 1 kcal/mol = 4.18 kJ/mol)

--- Start of file **A** xyz ---

$G_A = -863.1434$  a.u.

| Center Number | Atomic Number | Atomic Type | Coordinates (Angstroms) |           |           |
|---------------|---------------|-------------|-------------------------|-----------|-----------|
|               |               |             | X                       | Y         | Z         |
| 1             | 5             | 0           | -0.050941               | -0.319707 | -0.052913 |
| 2             | 6             | 0           | 0.240878                | 1.156912  | 0.712674  |
| 3             | 6             | 0           | 0.468184                | 2.328865  | -0.255577 |
| 4             | 6             | 0           | -2.714726               | -0.000620 | -0.259737 |
| 5             | 6             | 0           | -1.577405               | -0.929000 | 0.197926  |
| 6             | 6             | 0           | 2.535093                | -1.028287 | -0.278097 |
| 7             | 6             | 0           | 1.134706                | -1.459955 | 0.188271  |
| 8             | 1             | 0           | -0.010025               | -0.088217 | -1.256860 |

|    |    |   |           |           |           |
|----|----|---|-----------|-----------|-----------|
| 9  | 1  | 0 | 1.136247  | 1.128769  | 1.370176  |
| 10 | 1  | 0 | -0.595208 | 1.468138  | 1.375111  |
| 11 | 1  | 0 | 0.656296  | 3.281902  | 0.256314  |
| 12 | 1  | 0 | -0.400360 | 2.463644  | -0.906128 |
| 13 | 1  | 0 | 1.320197  | 2.126343  | -0.910418 |
| 14 | 1  | 0 | -3.710273 | -0.446716 | -0.141589 |
| 15 | 1  | 0 | -2.591243 | 0.253730  | -1.316442 |
| 16 | 1  | 0 | -2.719189 | 0.947665  | 0.291599  |
| 17 | 1  | 0 | -1.839745 | -1.257179 | 1.234172  |
| 18 | 1  | 0 | -1.651895 | -1.867947 | -0.368790 |
| 19 | 1  | 0 | 3.289707  | -1.817001 | -0.165994 |
| 20 | 1  | 0 | 2.900420  | -0.152444 | 0.272044  |
| 21 | 1  | 0 | 2.509659  | -0.744730 | -1.334282 |
| 22 | 1  | 0 | 0.845910  | -2.356812 | -0.377916 |
| 23 | 1  | 0 | 1.260792  | -1.864247 | 1.223115  |
| 24 | 19 | 0 | -0.100123 | -0.620156 | 2.798061  |

-----  
 --- End of file **A** xyz ---

--- Start of file **B** xyz ---

$G_B = -361.6306$  a.u.

-----  
 Center      Atomic      Atomic      Coordinates (Angstroms)  
 Number      Number      Type      X              Y              Z

|   |   |   |           |           |           |
|---|---|---|-----------|-----------|-----------|
| 1 | 7 | 0 | -0.262946 | 0.878139  | 0.024833  |
| 2 | 8 | 0 | -0.413190 | 2.077454  | -0.085531 |
| 3 | 6 | 0 | -1.471902 | 0.094866  | -0.004229 |
| 4 | 6 | 0 | -1.287554 | -1.283472 | 0.123512  |
| 5 | 6 | 0 | -2.394519 | -2.127794 | 0.107368  |
| 6 | 6 | 0 | -3.671380 | -1.586109 | -0.036030 |

|    |   |   |           |           |           |
|----|---|---|-----------|-----------|-----------|
| 7  | 6 | 0 | -3.849505 | -0.202407 | -0.163732 |
| 8  | 6 | 0 | -2.751743 | 0.644959  | -0.148551 |
| 9  | 1 | 0 | -0.278419 | -1.665790 | 0.233074  |
| 10 | 1 | 0 | -2.265193 | -3.200060 | 0.205654  |
| 11 | 1 | 0 | -4.536222 | -2.241432 | -0.048999 |
| 12 | 1 | 0 | -4.849070 | 0.204651  | -0.274590 |
| 13 | 1 | 0 | -2.857485 | 1.719245  | -0.245178 |

-----  
 --- End of file **B** xyz ---

--- Start of file **C** xyz ---

$G_C = -1224.8444$  a.u.

-----

| Center | Atomic | Atomic | Coordinates (Angstroms) |           |           |
|--------|--------|--------|-------------------------|-----------|-----------|
| Number | Number | Type   | X                       | Y         | Z         |
| 1      | 7      | 0      | -0.660388               | -1.692169 | 0.210566  |
| 2      | 8      | 0      | 0.380789                | -1.154668 | -0.676429 |
| 3      | 6      | 0      | -1.871734               | -0.896057 | 0.245107  |
| 4      | 5      | 0      | 1.065112                | 0.280740  | -0.409141 |
| 5      | 6      | 0      | -2.660035               | -0.723505 | -0.895962 |
| 6      | 6      | 0      | -3.847493               | -0.002381 | -0.823331 |
| 7      | 6      | 0      | -4.254874               | 0.555034  | 0.390016  |
| 8      | 6      | 0      | -3.471058               | 0.382966  | 1.528657  |
| 9      | 6      | 0      | -2.281870               | -0.342770 | 1.455666  |
| 10     | 6      | 0      | 2.463747                | 0.052658  | -1.261068 |
| 11     | 6      | 0      | 1.349017                | 0.494651  | 1.222946  |
| 12     | 6      | 0      | 0.079295                | 1.408471  | -1.081650 |
| 13     | 6      | 0      | 0.682907                | 2.740559  | -1.563980 |
| 14     | 1      | 0      | -2.323760               | -1.138367 | -1.840833 |
| 15     | 1      | 0      | -4.454386               | 0.130098  | -1.713504 |
| 16     | 1      | 0      | -5.179358               | 1.120963  | 0.445379  |
| 17     | 1      | 0      | -3.783279               | 0.813023  | 2.475068  |
| 18     | 1      | 0      | -1.666653               | -0.485474 | 2.337011  |
| 19     | 1      | 0      | 2.238016                | 0.065969  | -2.336705 |
| 20     | 1      | 0      | 0.595616                | -0.048109 | 1.815927  |
| 21     | 1      | 0      | -0.380433               | 0.927448  | -1.956409 |
| 22     | 1      | 0      | 1.438862                | 2.585659  | -2.340761 |
| 23     | 1      | 0      | 1.161465                | 3.306877  | -0.759210 |
| 24     | 1      | 0      | -0.910011               | -2.528395 | -0.314560 |



|    |    |   |           |           |           |
|----|----|---|-----------|-----------|-----------|
| 25 | 1  | 0 | 2.327916  | 0.068482  | 1.528773  |
| 26 | 1  | 0 | -0.765999 | 1.642219  | -0.418962 |
| 27 | 6  | 0 | 1.359772  | 1.942605  | 1.742551  |
| 28 | 1  | 0 | 0.411082  | 2.443718  | 1.534957  |
| 29 | 1  | 0 | 1.525249  | 1.993711  | 2.825849  |
| 30 | 1  | 0 | 2.146605  | 2.535339  | 1.268877  |
| 31 | 6  | 0 | 3.628069  | 1.021474  | -0.987525 |
| 32 | 1  | 0 | 4.508656  | 0.793776  | -1.600831 |
| 33 | 1  | 0 | 3.354593  | 2.057970  | -1.195856 |
| 34 | 1  | 0 | 3.953042  | 0.987649  | 0.059074  |
| 35 | 1  | 0 | 2.855368  | -0.973264 | -1.100225 |
| 36 | 1  | 0 | -0.082730 | 3.395582  | -1.998223 |
| 37 | 19 | 0 | 1.844327  | -2.340642 | 0.957024  |

-----  
 --- End of file **C** xyz ---

--- Start of file **D** xyz ---

$G_D = -411.9700$  a.u.

| Center<br>Number | Atomic<br>Number | Atomic<br>Type | Coordinates (Angstroms) |           |           |
|------------------|------------------|----------------|-------------------------|-----------|-----------|
|                  |                  |                | X                       | Y         | Z         |
| 1                | 8                | 0              | 0.360880                | 1.085024  | 1.183550  |
| 2                | 6                | 0              | 0.042888                | 0.789243  | -0.213561 |
| 3                | 6                | 0              | -0.042888               | -0.789243 | -0.213561 |
| 4                | 8                | 0              | -0.360880               | -1.085024 | 1.183550  |
| 5                | 5                | 0              | 0.000000                | 0.000000  | 1.930062  |
| 6                | 6                | 0              | 1.140299                | 1.379576  | -1.091806 |
| 7                | 6                | 0              | -1.294160               | 1.475976  | -0.510164 |
| 8                | 6                | 0              | 1.294160                | -1.475976 | -0.510164 |
| 9                | 6                | 0              | -1.140299               | -1.379576 | -1.091806 |
| 10               | 1                | 0              | 0.000000                | 0.000000  | 3.117021  |
| 11               | 1                | 0              | 0.972679                | 1.135849  | -2.144928 |
| 12               | 1                | 0              | 2.128688                | 1.019975  | -0.806883 |
| 13               | 1                | 0              | 1.140828                | 2.467571  | -0.996426 |
| 14               | 1                | 0              | -1.590997               | 1.349035  | -1.554167 |
| 15               | 1                | 0              | -1.197016               | 2.545236  | -0.311158 |
| 16               | 1                | 0              | -2.095535               | 1.091396  | 0.124233  |

|    |   |   |           |           |           |
|----|---|---|-----------|-----------|-----------|
| 17 | 1 | 0 | 1.197016  | -2.545236 | -0.311158 |
| 18 | 1 | 0 | 2.095535  | -1.091396 | 0.124233  |
| 19 | 1 | 0 | 1.590997  | -1.349035 | -1.554167 |
| 20 | 1 | 0 | -1.140828 | -2.467571 | -0.996426 |
| 21 | 1 | 0 | -0.972679 | -1.135849 | -2.144928 |
| 22 | 1 | 0 | -2.128688 | -1.019975 | -0.806883 |

-----  
 --- End of file **D** xyz ---

--- Start of file **E** xyz ---

$G_E = -773.6774$  a.u.

| Center<br>Number | Atomic<br>Number | Atomic<br>Type | Coordinates (Angstroms) |           |           |
|------------------|------------------|----------------|-------------------------|-----------|-----------|
|                  |                  |                | X                       | Y         | Z         |
| 1                | 6                | 0              | -4.470437               | -1.250381 | 0.543850  |
| 2                | 6                | 0              | -3.166425               | -1.157061 | 0.059699  |
| 3                | 6                | 0              | -2.684083               | 0.074365  | -0.391794 |
| 4                | 6                | 0              | -3.517938               | 1.201273  | -0.356156 |
| 5                | 6                | 0              | -4.816626               | 1.092009  | 0.126889  |
| 6                | 6                | 0              | -5.303560               | -0.134743 | 0.581316  |
| 7                | 1                | 0              | -4.834750               | -2.210887 | 0.895058  |
| 8                | 1                | 0              | -2.522180               | -2.025684 | 0.032251  |
| 9                | 1                | 0              | -3.149370               | 2.158571  | -0.714952 |
| 10               | 1                | 0              | -5.450708               | 1.972799  | 0.150817  |
| 11               | 1                | 0              | -6.317095               | -0.216780 | 0.959069  |
| 12               | 7                | 0              | -1.404843               | 0.218127  | -0.976629 |
| 13               | 1                | 0              | -0.966182               | 1.100689  | -0.725631 |
| 14               | 8                | 0              | -0.521234               | -0.835826 | -0.576679 |
| 15               | 5                | 0              | 0.750569                | -0.459077 | -0.266810 |
| 16               | 6                | 0              | 2.978028                | -0.641677 | 0.125613  |
| 17               | 6                | 0              | 2.511675                | 0.856330  | 0.332552  |
| 18               | 8                | 0              | 1.709682                | -1.364396 | 0.094859  |
| 19               | 8                | 0              | 1.181317                | 0.847478  | -0.279032 |
| 20               | 6                | 0              | 3.360414                | 1.903676  | -0.377242 |
| 21               | 1                | 0              | 2.944822                | 2.898095  | -0.199295 |
| 22               | 1                | 0              | 4.385505                | 1.897989  | 0.003992  |
| 23               | 1                | 0              | 3.391202                | 1.741695  | -1.454335 |
| 24               | 6                | 0              | 2.318992                | 1.234872  | 1.803538  |

|    |   |   |          |           |           |
|----|---|---|----------|-----------|-----------|
| 25 | 1 | 0 | 1.817901 | 2.203552  | 1.861155  |
| 26 | 1 | 0 | 1.699921 | 0.505668  | 2.330555  |
| 27 | 1 | 0 | 3.274478 | 1.315876  | 2.326996  |
| 28 | 6 | 0 | 3.827546 | -1.212426 | 1.254878  |
| 29 | 1 | 0 | 4.763065 | -0.655811 | 1.361572  |
| 30 | 1 | 0 | 3.301367 | -1.193099 | 2.208919  |
| 31 | 1 | 0 | 4.080139 | -2.251775 | 1.034353  |
| 32 | 6 | 0 | 3.658963 | -0.882619 | -1.224971 |
| 33 | 1 | 0 | 4.650001 | -0.424383 | -1.266191 |
| 34 | 1 | 0 | 3.773989 | -1.957578 | -1.377389 |
| 35 | 1 | 0 | 3.063991 | -0.491451 | -2.053222 |

-----  
 --- End of file E xyz ---

#### 4. NMR spectra data

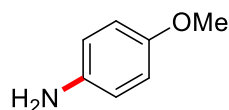

**4-Methoxyaniline (2a)**, white solid, 0.062 g, 84%.  $^1\text{H}$  NMR (400 MHz,  $\text{CDCl}_3$ , 20 °C)  $\delta$  6.78-6.72 (m, 2H), 6.68-6.61 (m, 2H), 3.75 (s, 3H), 3.41 (s, 2H).  $^{13}\text{C}$   $\{^1\text{H}\}$  NMR (101 MHz,  $\text{CDCl}_3$ , 20 °C)  $\delta$  152.9, 140.1, 116.5, 114.9, 55.8. These spectroscopic data correspond to reported data.<sup>4</sup>

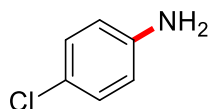

**4-Chloroaniline (2c)**, white solid, 0.056 g, 73%.  $^1\text{H}$  NMR (400 MHz,  $\text{CDCl}_3$ , 20 °C)  $\delta$  7.14-7.05 (m, 2H), 6.68-6.54 (m, 2H), 3.60 (s, 2H).  $^{13}\text{C}$   $\{^1\text{H}\}$  NMR (101 MHz,  $\text{CDCl}_3$ , 20 °C)  $\delta$  145.1, 129.2, 123.2, 116.3. These spectroscopic data correspond to reported data.<sup>5</sup>

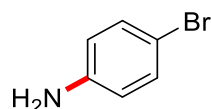

**4-Bromoaniline (2d)**, gray solid, 0.076 g, 74%.  $^1\text{H}$  NMR (400 MHz,  $\text{CDCl}_3$ , 20 °C)  $\delta$  7.22 (d,  $J = 8.6$  Hz, 2H), 6.54 (d,  $J = 8.6$  Hz, 2H), 3.65 (s, 2H).  $^{13}\text{C}$   $\{^1\text{H}\}$  NMR (101 MHz,  $\text{CDCl}_3$ , 20 °C)  $\delta$  145.5, 132.0, 116.8, 110.2. These spectroscopic data correspond to reported data.<sup>4</sup>

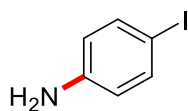

**4-Iodoaniline (2e)**, grayish-brown solid, 0.088 g, 67%.  $^1\text{H}$  NMR (400 MHz,  $\text{CDCl}_3$ , 20  $^\circ\text{C}$ )  $\delta$  7.41 (t,  $J = 5.7$  Hz, 2H), 6.47 (t,  $J = 5.7$  Hz, 2H), 3.62 (s, 2H).  $^{13}\text{C}$   $\{^1\text{H}\}$  NMR (101 MHz,  $\text{CDCl}_3$ , 20  $^\circ\text{C}$ )  $\delta$  146.2, 138.0, 117.4, 79.5. These spectroscopic data correspond to reported data.<sup>4</sup>

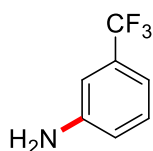

**3-(Trifluoromethyl)aniline (2f)**, colorless oil, 0.068 g, 70%.  $^1\text{H}$  NMR (400 MHz,  $\text{CDCl}_3$ , 20  $^\circ\text{C}$ )  $\delta$  7.22 (dd,  $J = 10.5$  Hz,  $J = 5.3$  Hz, 1H), 6.98 (d,  $J = 7.7$  Hz, 1H), 6.87 (s, 1H), 6.79 (dd,  $J = 8.0$  Hz,  $J = 2.2$  Hz, 1H), 3.80 (s, 2H).  $^{13}\text{C}$   $\{^1\text{H}\}$  NMR (101 MHz,  $\text{CDCl}_3$ , 20  $^\circ\text{C}$ )  $\delta$  146.9, 131.7 (q,  $J = 31.8$  Hz), 129.9, 124.4 (q,  $J = 272.2$  Hz), 118.1 (d,  $J = 1.2$  Hz), 115.1 (q,  $J = 4.0$  Hz), 111.4 (q,  $J = 3.9$  Hz).  $^{19}\text{F}$  NMR (377 MHz,  $\text{CDCl}_3$ , 20  $^\circ\text{C}$ )  $\delta$  -62.91. These spectroscopic data correspond to reported data.<sup>4</sup>

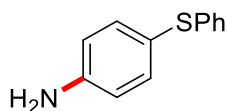

**4-(Phenylthio)aniline (2g)**, yellow solid, 0.078 g, 65%.  $^1\text{H}$  NMR (400 MHz,  $\text{CDCl}_3$ , 20  $^\circ\text{C}$ )  $\delta$  7.36-7.29 (m, 2H), 7.24-7.18 (m, 2H), 7.16-7.06 (m, 3H), 6.72-6.63 (m, 2H), 3.81 (s, 2H).  $^{13}\text{C}$   $\{^1\text{H}\}$  NMR (101 MHz,  $\text{CDCl}_3$ , 20  $^\circ\text{C}$ )  $\delta$  147.2, 139.8, 136.3, 128.9, 127.4, 125.4, 120.6, 116.0. These spectroscopic data correspond to reported data.<sup>6</sup>

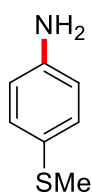

**4-(Methylthio)aniline (2h)**, colorless oil, 0.046 g, 55%.  $^1\text{H}$  NMR (400 MHz,  $\text{CDCl}_3$ , 20  $^\circ\text{C}$ )  $\delta$  7.18 (d,  $J = 8.1$  Hz, 2H), 6.63 (d,  $J = 8.1$  Hz, 2H), 3.67 (s, 2H), 2.41 (s, 3H).  $^{13}\text{C}$   $\{^1\text{H}\}$  NMR (101 MHz,  $\text{CDCl}_3$ , 20  $^\circ\text{C}$ )  $\delta$  145.2, 131.1, 115.8, 18.9. These spectroscopic data correspond to reported data.<sup>5</sup>

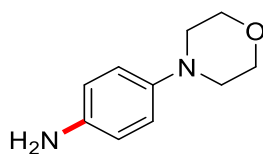

**4-Morpholinoaniline (2i)**, white solid, 0.079 g, 74%.  $^1\text{H}$  NMR (400 MHz,  $\text{CDCl}_3$ , 20

$^{\circ}\text{C}$ )  $\delta$  6.79 (d,  $J = 8.7$  Hz, 2H), 6.66 (d,  $J = 8.7$  Hz, 2H), 3.91-3.79 (m, 4H), 3.41 (s, 2H), 3.08-2.94 (m, 4H).  $^{13}\text{C}$   $\{^1\text{H}\}$  NMR (101 MHz,  $\text{CDCl}_3$ , 20  $^{\circ}\text{C}$ )  $\delta$  144.5, 140.4, 118.3, 116.3, 67.2, 51.2. These spectroscopic data correspond to reported data.<sup>5</sup>

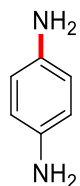

***p*-Phenylenediamine (2j)**, white solid, 0.042 g, 65%.  $^1\text{H}$  NMR (400 MHz,  $\text{CDCl}_3$ , 20  $^{\circ}\text{C}$ )  $\delta$  6.56 (s, 4H), 3.32 (s, 4H).  $^{13}\text{C}$   $\{^1\text{H}\}$  NMR (101 MHz,  $\text{CDCl}_3$ , 20  $^{\circ}\text{C}$ )  $\delta$  138.7, 116.8. These spectroscopic data correspond to reported data.<sup>4</sup>

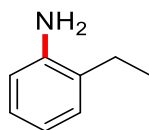

**2-Ethylaniline (2k)**, yellow oil, 0.058 g, 80%.  $^1\text{H}$  NMR (400 MHz,  $\text{CDCl}_3$ , 20  $^{\circ}\text{C}$ )  $\delta$  7.12 (dd,  $J = 17.3$  Hz,  $J = 7.8$  Hz, 2H), 6.82 (t,  $J = 7.4$  Hz, 1H), 6.73 (d,  $J = 7.8$  Hz, 1H), 3.65 (s, 2H), 2.57 (q,  $J = 7.5$  Hz, 2H), 1.32 (t,  $J = 7.5$  Hz, 3H).  $^{13}\text{C}$   $\{^1\text{H}\}$  NMR (101 MHz,  $\text{CDCl}_3$ , 20  $^{\circ}\text{C}$ )  $\delta$  144.1, 128.4, 128.1, 126.9, 118.9, 115.4, 24.1, 13.1. These spectroscopic data correspond to reported data.<sup>4</sup>

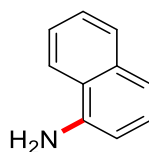

**1-Naphthylamine (2l)**, white solid, 0.069 g, 80%.  $^1\text{H}$  NMR (400 MHz,  $\text{CDCl}_3$ , 20  $^{\circ}\text{C}$ )  $\delta$  7.84 (ddd,  $J = 5.5$  Hz,  $J = 3.1$  Hz,  $J = 1.4$  Hz, 2H), 7.56-7.44 (m, 2H), 7.34 (qd,  $J = 8.1$  Hz,  $J = 7.0$  Hz, 2H), 6.80 (dd,  $J = 6.9$  Hz,  $J = 1.5$  Hz, 1H), 4.15 (s, 2H).  $^{13}\text{C}$   $\{^1\text{H}\}$  NMR (101 MHz,  $\text{CDCl}_3$ , 20  $^{\circ}\text{C}$ )  $\delta$  142.2, 134.5, 128.6, 126.4, 125.9, 125.0, 123.8, 120.9, 119.1, 109.8. These spectroscopic data correspond to reported data.<sup>4</sup>

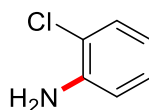

**2-Chloroaniline (2m)**, yellow oil, 0.058 g, 76%.  $^1\text{H}$  NMR (400 MHz,  $\text{CDCl}_3$ , 20  $^{\circ}\text{C}$ )  $\delta$  7.22 (dd,  $J = 8.0$  Hz,  $J = 1.2$  Hz, 1H), 7.07-6.98 (m, 1H), 6.72 (dd,  $J = 8.0$  Hz,  $J = 1.3$  Hz, 1H), 6.69-6.62 (m, 1H), 4.00 (s, 2H).  $^{13}\text{C}$   $\{^1\text{H}\}$  NMR (101 MHz,  $\text{CDCl}_3$ , 20  $^{\circ}\text{C}$ )  $\delta$  143.0, 129.5, 127.7, 119.3, 119.1, 116.0. These spectroscopic data correspond to reported data.<sup>7</sup>

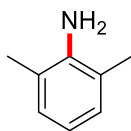

**2, 6-Dimethylaniline (2n)**, yellow oil, 0.063 g, 87%.  $^1\text{H}$  NMR (400 MHz,  $\text{CDCl}_3$ , 20  $^\circ\text{C}$ )  $\delta$  7.02 (d,  $J = 7.5$  Hz, 2H), 6.72 (t,  $J = 7.5$  Hz, 1H), 3.62 (s, 2H), 2.25 (s, 6H).  $^{13}\text{C}$   $\{^1\text{H}\}$  NMR (101 MHz,  $\text{CDCl}_3$ , 20  $^\circ\text{C}$ )  $\delta$  142.8, 128.3, 121.7, 118.0, 17.7. These spectroscopic data correspond to reported data.<sup>4</sup>

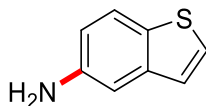

**Benzo[b]thiophen-5-amine (2o)**, white solid, 0.064 g, 71%.  $^1\text{H}$  NMR (400 MHz,  $\text{CDCl}_3$ , 20  $^\circ\text{C}$ )  $\delta$  7.64 (d,  $J = 8.5$  Hz, 1H), 7.38 (d,  $J = 5.4$  Hz, 1H), 7.15 (d,  $J = 5.4$  Hz, 1H), 7.10 (s, 1H), 6.82-6.73 (m, 1H).  $^{13}\text{C}$   $\{^1\text{H}\}$  NMR (101 MHz,  $\text{CDCl}_3$ , 20  $^\circ\text{C}$ )  $\delta$  143.6, 140.9, 130.5, 127.2, 123.1, 123.0, 115.0, 108.4. These spectroscopic data correspond to reported data.<sup>5</sup>

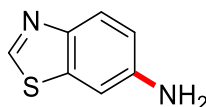

**Benzo[d]thiazol-6-amine (2p)**, white solid, 0.055 g, 61%.  $^1\text{H}$  NMR (400 MHz,  $\text{DMSO-}d_6$ , 20  $^\circ\text{C}$ )  $\delta$  8.87 (s, 1H), 7.72 (d,  $J = 8.7$  Hz, 1H), 7.13 (d,  $J = 1.7$  Hz, 1H), 6.81 (dd,  $J = 8.7$  Hz,  $J = 1.9$  Hz, 1H), 5.41 (s, 2H).  $^{13}\text{C}$   $\{^1\text{H}\}$  NMR (101 MHz,  $\text{DMSO-}d_6$ , 20  $^\circ\text{C}$ )  $\delta$  149.1, 147.3, 144.8, 135.2, 123.1, 114.9, 103.8. These spectroscopic data correspond to reported data.<sup>5</sup>

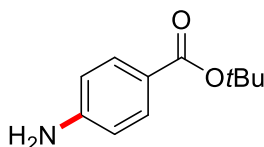

***t*-Butyl-4-aminobenzoate (2q)**, white solid, 0.11 g, 99%.  $^1\text{H}$  NMR (400 MHz,  $\text{CDCl}_3$ , 20  $^\circ\text{C}$ )  $\delta$  7.80 (d,  $J = 8.6$  Hz, 2H), 6.66-6.57 (m, 2H), 4.02 (s, 2H), 1.56 (s, 9H).  $^{13}\text{C}$   $\{^1\text{H}\}$  NMR (101 MHz,  $\text{CDCl}_3$ , 20  $^\circ\text{C}$ )  $\delta$  166.1, 150.5, 131.5, 121.8, 113.8, 80.2, 28.4. These spectroscopic data correspond to reported data.<sup>8</sup>

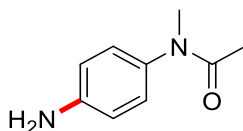

**N-(4-aminophenyl)-N-methylacetamide (2r)**, yellow solid, 0.060 g, 61%.  $^1\text{H}$  NMR (400 MHz,  $\text{CDCl}_3$ , 20  $^\circ\text{C}$ )  $\delta$  6.92 (d,  $J = 8.5$  Hz, 2H), 6.66 (d,  $J = 8.5$  Hz, 2H), 3.83 (s, 2H), 3.18 (s, 3H), 1.83 (s, 3H).  $^{13}\text{C}$   $\{^1\text{H}\}$  NMR (101 MHz,  $\text{CDCl}_3$ , 20  $^\circ\text{C}$ )  $\delta$  171.4, 146.1,

135.5, 128.0, 115.7, 37.4, 29.8, 22.4. These spectroscopic data correspond to reported data.<sup>9</sup>

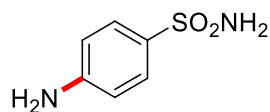

**4-Aminobenzenesulfonamide (2s)**, white solid, 0.083 g, 80%. <sup>1</sup>H NMR (400 MHz, DMSO-*d*<sub>6</sub>, 20 °C) δ 7.45 (d, *J* = 8.6 Hz, 2H), 6.88 (s, 2H), 6.58 (d, *J* = 8.6 Hz, 2H), 5.80 (s, 2H). <sup>13</sup>C{<sup>1</sup>H} NMR (101 MHz, DMSO-*d*<sub>6</sub>, 20 °C) δ 151.9, 130.0, 127.4, 112.4. These spectroscopic data correspond to reported data.<sup>10</sup>

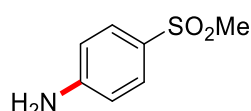

**4-(Methylsulfonyl)aniline (2t)**, yellow solid, 0.077 g, 75%. <sup>1</sup>H NMR (400 MHz, DMSO-*d*<sub>6</sub>, 20 °C) δ 7.50 (d, *J* = 8.7 Hz, 2H), 6.64 (d, *J* = 8.7 Hz, 2H), 6.09 (s, 2H), 3.02 (s, 3H). <sup>13</sup>C{<sup>1</sup>H} NMR (101 MHz, DMSO-*d*<sub>6</sub>, 20 °C) δ 153.5, 128.8, 125.8, 112.7, 44.5. These spectroscopic data correspond to reported data.<sup>11</sup>

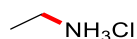

**Ethylamine hydrochloride (5a)**, white solid, 0.039 g, 80%. <sup>1</sup>H NMR (400 MHz, DMSO-*d*<sub>6</sub>, 20 °C) δ 7.84 (s, 3H), 2.77 (dd, *J* = 14.0 Hz, *J* = 6.9 Hz, 2H), 1.15 (t, *J* = 7.1 Hz, 3H). <sup>13</sup>C{<sup>1</sup>H} NMR (101 MHz, DMSO-*d*<sub>6</sub>, 20 °C) δ 34.0, 12.5. These spectroscopic data correspond to reported data.<sup>12</sup>

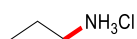

***n*-Propylamine hydrochloride (5b)**, white solid, 0.051 g, 88%. <sup>1</sup>H NMR (400 MHz, D<sub>2</sub>O, 20 °C) δ 2.96 (t, *J* = 7.4 Hz, 2H), 1.67 (dq, *J* = 14.7 Hz, *J* = 7.3 Hz, 2H), 0.97 (t, *J* = 7.4 Hz, 3H). <sup>13</sup>C {<sup>1</sup>H} NMR (101 MHz, D<sub>2</sub>O, 20 °C) δ 41.1, 20.2, 10.1. These spectroscopic data correspond to reported data.<sup>12</sup>

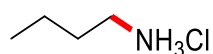

***n*-Butylamine hydrochloride (5c)**, white solid, 0.059 g, 90%. <sup>1</sup>H NMR (400 MHz, DMSO-*d*<sub>6</sub>, 20 °C) δ 7.99 (s, 3H), 2.73 (t, *J* = 7.5 Hz, 2H), 1.59-1.46 (m, 2H), 1.31 (dq, *J* = 14.5 Hz, *J* = 7.1 Hz, 2H), 0.86 (t, *J* = 7.2 Hz, 3H). <sup>13</sup>C{<sup>1</sup>H} NMR (101 MHz, DMSO-*d*<sub>6</sub>, 20 °C) δ 38.4, 29.0, 19.2, 13.5. These spectroscopic data correspond to reported data.<sup>12</sup>

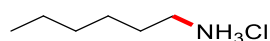

**Hexylamine hydrochloride (5d)**, white solid, 0.077 g, 93%. <sup>1</sup>H NMR (400 MHz, DMSO-*d*<sub>6</sub>, 20 °C) δ 8.22 (s, 3H), 2.69 (t, *J* = 7.5 Hz, 2H), 1.63-1.46 (m, 2H), 1.28 (dd, *J* = 14.5 Hz, *J* = 7.7 Hz, 6H), 0.85 (t, *J* = 6.7 Hz, 3H). <sup>13</sup>C{<sup>1</sup>H} NMR (101 MHz, DMSO-*d*<sub>6</sub>, 20 °C) δ 30.8, 26.8, 25.6, 22.0, 13.9. These spectroscopic data correspond to reported

data.<sup>12</sup>

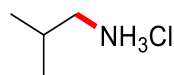

**Isobutylamine hydrochloride (5e)**, white solid, 0.055 g, 83%. <sup>1</sup>H NMR (400 MHz, DMSO-*d*<sub>6</sub>, 20 °C) δ 8.11 (s, 3H), 2.59 (s, 2H), 1.93-1.83 (m, 1H), 0.91 (d, *J* = 6.7 Hz, 6H). <sup>13</sup>C{<sup>1</sup>H} NMR (101 MHz, DMSO-*d*<sub>6</sub>, 20 °C) δ 45.6, 26.3, 19.8. These spectroscopic data correspond to reported data.<sup>12</sup>

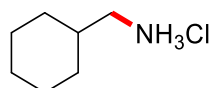

**Cyclohexanemethylamine hydrochloride (5f)**, white solid, 0.079 g, 88%. <sup>1</sup>H NMR (400 MHz, DMSO-*d*<sub>6</sub>, 20 °C) δ 8.08 (s, 3H), 2.60 (s, 2H), 1.70 (dd, *J* = 24.2 Hz, *J* = 12.6 Hz, 4H), 1.65-1.47 (m, 2H), 1.24-1.05 (m, 3H), 1.02-0.74 (m, 2H). <sup>13</sup>C{<sup>1</sup>H} NMR (101 MHz, DMSO-*d*<sub>6</sub>, 20 °C) δ 44.3, 35.4, 29.8, 25.6, 25.0. These spectroscopic data correspond to reported data.<sup>12</sup>

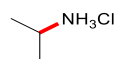

***i*-Propylamine hydrochloride (5g)**, white solid, 0.056 g, 97%. <sup>1</sup>H NMR (400 MHz, D<sub>2</sub>O, 20 °C) δ 3.49 (s, 1H), 1.30 (s, 6H). <sup>13</sup>C {<sup>1</sup>H} NMR (101 MHz, D<sub>2</sub>O, 20 °C) δ 44.0, 19.8. These spectroscopic data correspond to reported data.<sup>5</sup>

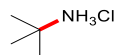

***t*-Butylamine hydrochloride (5h)**, white solid, 0.059 g, 89%. <sup>1</sup>H NMR (400 MHz, D<sub>2</sub>O, 20 °C) δ 1.38(s, 9 H). <sup>13</sup>C {<sup>1</sup>H} NMR (101 MHz, D<sub>2</sub>O, 20 °C) δ 52.0, 26.6. These spectroscopic data correspond to reported data.<sup>5</sup>

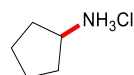

**Cyclopentylamine hydrochloride (5i)**, white solid, 0.064 g, 87%. <sup>1</sup>H NMR (400 MHz, D<sub>2</sub>O, 20 °C) δ 3.66 (s, 1H), 2.06 (s, 2H), 1.69 (d, *J* = 43.7 Hz, 6H). <sup>13</sup>C {<sup>1</sup>H} NMR (101 MHz, D<sub>2</sub>O, 20 °C) δ 52.2, 30.6, 23.5. These spectroscopic data correspond to reported data.<sup>5</sup>

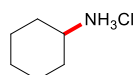

**Cyclohexylamine hydrochloride (5j)**, white solid, 0.073 g, 90%. <sup>1</sup>H NMR (400 MHz, D<sub>2</sub>O, 20 °C) δ 3.16 (td, *J* = 10.6 Hz, *J* = 5.2 Hz, 1H), 2.00 (d, *J* = 7.5 Hz, 2H), 1.81 (d, *J* = 4.9 Hz, 2H), 1.66 (d, *J* = 12.2 Hz, 1H), 1.44-1.26 (m, 4H), 1.25-1.10 (m, 1H). <sup>13</sup>C {<sup>1</sup>H} NMR (101 MHz, D<sub>2</sub>O, 20 °C) δ 50.4, 30.3, 24.3, 23.8. These spectroscopic data correspond to reported data.<sup>5</sup>



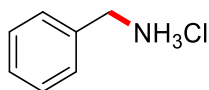

**Benzylamine hydrochloride (5k)**, white solid, 0.085 g, 99%.  $^1\text{H}$  NMR (400 MHz,  $\text{D}_2\text{O}$ , 20 °C)  $\delta$  7.54-7.42 (m, 5H), 4.19 (s, 2H).  $^{13}\text{C}\{^1\text{H}\}$  NMR (101 MHz,  $\text{D}_2\text{O}$ , 20 °C)  $\delta$  132.6, 129.2, 128.8, 43.1. These spectroscopic data correspond to reported data.<sup>13</sup>

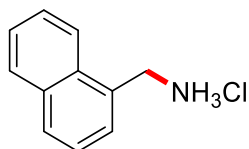

**Naphthalen-1-ylmethanamine hydrochloride (5l)**, white solid, 0.092 g, 79%.  $^1\text{H}$  NMR (400 MHz,  $\text{DMSO-}d_6$ , 20 °C)  $\delta$  8.52 (s, 3H), 8.15 (d,  $J$  = 8.2 Hz, 1H), 8.00 (t,  $J$  = 9.1 Hz, 2H), 7.69-7.51 (m, 4H), 4.52 (d,  $J$  = 5.6 Hz, 2H).  $^{13}\text{C}\{^1\text{H}\}$  NMR (101 MHz,  $\text{DMSO-}d_6$ , 20 °C)  $\delta$  133.2, 130.7, 130.2, 128.9, 128.7, 127.3, 126.8, 126.2, 125.4, 123.5. These spectroscopic data correspond to reported data.<sup>12</sup>

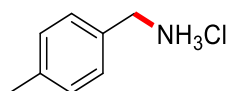

**4-Methylbenzylamine hydrochloride (5m)**, white solid, 0.093 g, 98%.  $^1\text{H}$  NMR (400 MHz,  $\text{DMSO-}d_6$ , 20 °C)  $\delta$  8.38 (s, 3H), 7.37 (d,  $J$  = 8.0 Hz, 2H), 7.22 (d,  $J$  = 7.8 Hz, 2H), 3.95 (q,  $J$  = 5.7 Hz, 2H), 2.31 (s, 3H).  $^{13}\text{C}\{^1\text{H}\}$  NMR (101 MHz,  $\text{DMSO-}d_6$ , 20 °C)  $\delta$  137.8, 131.0, 129.1, 128.9, 41.9, 20.7. These spectroscopic data correspond to reported data.<sup>13</sup>

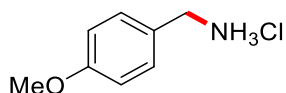

**4-Methoxybenzylamine hydrochloride (5n)**, white solid, 0.10g, 99%.  $^1\text{H}$  NMR (400 MHz,  $\text{DMSO-}d_6$ , 20 °C)  $\delta$  8.29 (s, 3H), 7.41 (d,  $J$  = 8.6 Hz, 2H), 6.97 (d,  $J$  = 8.6 Hz, 2H), 3.93 (q,  $J$  = 5.7 Hz, 2H), 3.76 (s, 3H).  $^{13}\text{C}\{^1\text{H}\}$  NMR (101 MHz,  $\text{DMSO-}d_6$ , 20 °C)  $\delta$  159.4, 130.5, 125.9, 113.9, 55.2, 41.7. These spectroscopic data correspond to reported data.<sup>13</sup>

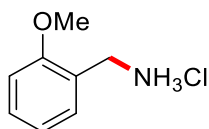

***o*-Anisidine hydrochloride (5o)**, white solid, 0.085 g, 82%.  $^1\text{H}$  NMR (400 MHz,  $\text{DMSO-}d_6$ , 20 °C)  $\delta$  8.33 (s, 3H), 7.39 (dd,  $J$  = 11.6 Hz,  $J$  = 7.6 Hz, 2H), 7.07 (d,  $J$  = 8.2 Hz, 1H), 6.98 (t,  $J$  = 7.4 Hz, 1H), 3.95 (q,  $J$  = 5.6 Hz, 2H), 3.83 (s, 3H).  $^{13}\text{C}\{^1\text{H}\}$  NMR (101 MHz,  $\text{DMSO-}d_6$ , 20 °C)  $\delta$  157.2, 130.3 (d,  $J$  = 3.8 Hz), 121.7, 120.3, 110.9, 55.5, 37.6. These spectroscopic data correspond to reported data.<sup>12</sup>

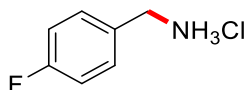

**4-Fluorobenzylamine hydrochloride (5p)**, white solid, 0.084 g, 87%.  $^1\text{H}$  NMR (400 MHz, DMSO- $d_6$ , 20 °C)  $\delta$  8.52 (s, 3H), 7.56 (dd,  $J$  = 8.3 Hz,  $J$  = 5.7 Hz, 2H), 7.25 (t,  $J$  = 8.9 Hz, 2H), 4.00 (s, 2H).  $^{19}\text{F}$  NMR (377 MHz, DMSO- $d_6$ , 20 °C)  $\delta$  -113.69.  $^{13}\text{C}\{^1\text{H}\}$  NMR (101 MHz, DMSO- $d_6$ , 20 °C)  $\delta$  163.3, 160.8, 131.3 (d,  $J$  = 8.4 Hz), 130.4 (d,  $J$  = 3.1 Hz), 115.4, 115.2, 41.4. These spectroscopic data correspond to reported data.<sup>12</sup>

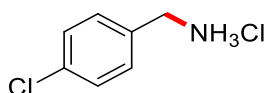

**4-Chlorobenzylamine hydrochloride (5q)**, white solid, 0.085 g, 80%.  $^1\text{H}$  NMR (400 MHz, DMSO- $d_6$ , 20 °C)  $\delta$  8.60 (s, 3H), 7.55 (d,  $J$  = 7.9 Hz, 2H), 7.47 (d,  $J$  = 7.9 Hz, 2H), 4.00 (s, 2H).  $^{13}\text{C}\{^1\text{H}\}$  NMR (101 MHz, DMSO- $d_6$ , 20 °C)  $\delta$  133.2, 133.1, 131.0, 128.5, 41.4. These spectroscopic data correspond to reported data.<sup>12</sup>

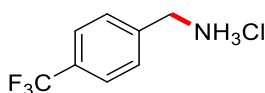

**[4-(Trifluoromethyl)phenyl]methanamine hydrochloride (5r)**, white solid, 0.10 g, 79%.  $^1\text{H}$  NMR (400 MHz, DMSO- $d_6$ , 20 °C)  $\delta$  8.89 (s, 3H), 7.75 (q,  $J$  = 8.2 Hz, 4H), 4.10 (s, 2H).  $^{13}\text{C}\{^1\text{H}\}$  NMR (101 MHz, DMSO- $d_6$ , 20 °C)  $\delta$  138.9, 130.0, 129.0 (q,  $J$  = 31.8 Hz), 125.4 (d,  $J$  = 3.7 Hz), 124.3 (d,  $J$  = 273.7 Hz), 41.7.  $^{19}\text{F}$  NMR (377 MHz, DMSO- $d_6$ , 20 °C)  $\delta$  -61.17. These spectroscopic data correspond to reported data.<sup>13</sup>

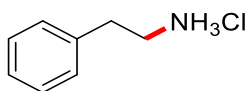

**2-Phenylethylamine hydrochloride (5s)**, white solid, 0.069 g, 73%.  $^1\text{H}$  NMR (400 MHz, D $_2$ O, 20 °C)  $\delta$  7.38 (dt,  $J$  = 15.0 Hz,  $J$  = 7.1 Hz, 5H), 3.27 (t,  $J$  = 7.2 Hz, 2H), 3.05- 2.96 (m, 2H).  $^{13}\text{C}\{^1\text{H}\}$  NMR (101 MHz, D $_2$ O, 20 °C)  $\delta$  136.6, 129.0, 128.9, 127.3, 40.6, 32.7. These spectroscopic data correspond to reported data.<sup>12</sup>

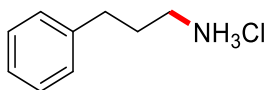

**Phenylethylamine hydrochloride (5t)**, white solid, 0.087 g, 84%.  $^1\text{H}$  NMR (400 MHz, DMSO- $d_6$ , 20 °C)  $\delta$  8.03 (s, 3H), 7.30 (t,  $J$  = 7.4 Hz, 2H), 7.25-7.13 (m, 2H), 2.76 (dd,  $J$  = 13.4 Hz,  $J$  = 6.4 Hz, 2H), 2.64 (t,  $J$  = 7.7 Hz, 2H), 1.93-1.72 (m, 2H).  $^{13}\text{C}\{^1\text{H}\}$  NMR (101 MHz, DMSO- $d_6$ , 20 °C)  $\delta$  140.9, 128.4, 128.2, 126.0, 38.3, 31.8, 28.7. These spectroscopic data correspond to reported data.<sup>12</sup>

## 5. References

- [1] (a) D. Peng, M. Zhang and Z. Huang, *Chem. Eur. J.*, 2015, **21**, 14737; (b) W. Yao, J. Wang, A. Zhong, J. Li and J. Yang, *Org. Lett.*, 2020, **22**, 8086.
- [2] (a) M. G. Manas, L. S. Sharninghausen, D. Balcells and R. H. Crabtree, *New J. Chem.*, 2014, **38**, 1694; (b) D. Bedi, A. Brar and M. Findlater, *Green Chem.*, 2020, **22**, 1125.
- [3] (a) J. Xiao, Y. He, F. Ye and S. Zhu, *Chem*, 2018, **4**, 1645; (b) S. Park, I. S. Lee and J. Park, *Org. Biomol. Chem.*, 2013, **11**, 395.
- [4] V. Zubar, A. Dewanji and M. Rueping, *Org. Lett.*, 2021, **23**, 2742.
- [5] L. Zhao, C. Hu, X. Cong, G. Deng, L. L. Liu, M. Luo and X. Zeng, *J. Am. Chem. Soc.*, 2021, **143**, 1618.
- [6] A. C. Jones, W. I. Nicholson, H. R. Smallman and D. L. Browne, *Org. Lett.*, 2020, **22**, 8746.
- [7] H. R. Dasgupta, S. Mukherjee and P. Ghosh, *Tetrahedron Lett.*, 2019, **60**, 151028.
- [8] N. R. Lee, A. A. Bikovtseva, M. Cortes-Clerget, F. Gallou and B. H. Lipshutz, *Org. Lett.*, 2017, **19**, 6518.
- [9] H.-G. Cheng, M. Pu, G. Kundu and F. Schoenebeck, *Org. Lett.*, 2020, **22**, 4581.
- [10] G. Fernández, J. Sort and R. Pleixats, *ChemistrySelect*, 2018, **3**, 8597.
- [11] D. Han, S. Li, S. Xia, M. Su and J. Jin, *Chem. Eur. J.* 2020, **26**, 12349.
- [12] C. Bäumler, C. Bauer and R. Kempe, *ChemSusChem*, 2020, **13**, 3110.
- [13] M. Bhunia, S. R. Sahoo, A. Das, J. Ahmed, S. P. and S. K. Mandal, *Chem. Sci.*, 2020, **11**, 1848.

## 6. NMR spectra

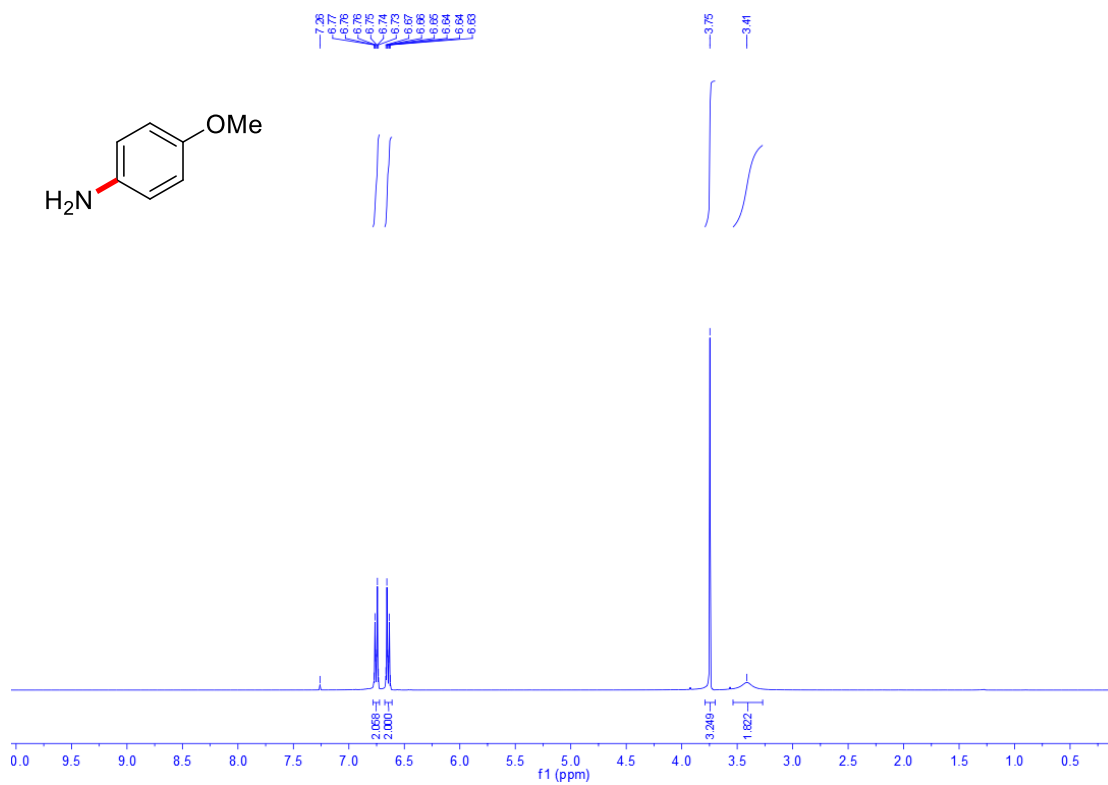

Figure S5. <sup>1</sup>H NMR (400 MHz, CDCl<sub>3</sub>, 20 °C) of 2a

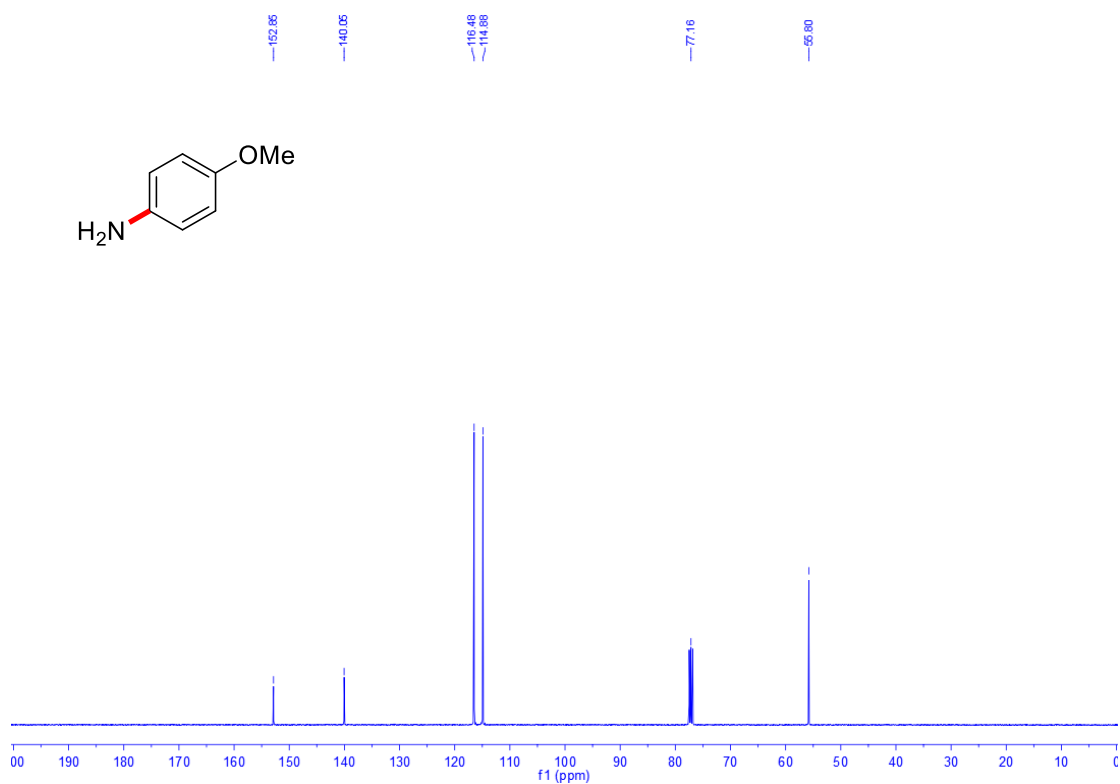

Figure S6. <sup>13</sup>C{<sup>1</sup>H} (101 MHz, CDCl<sub>3</sub>, 20 °C) of 2a

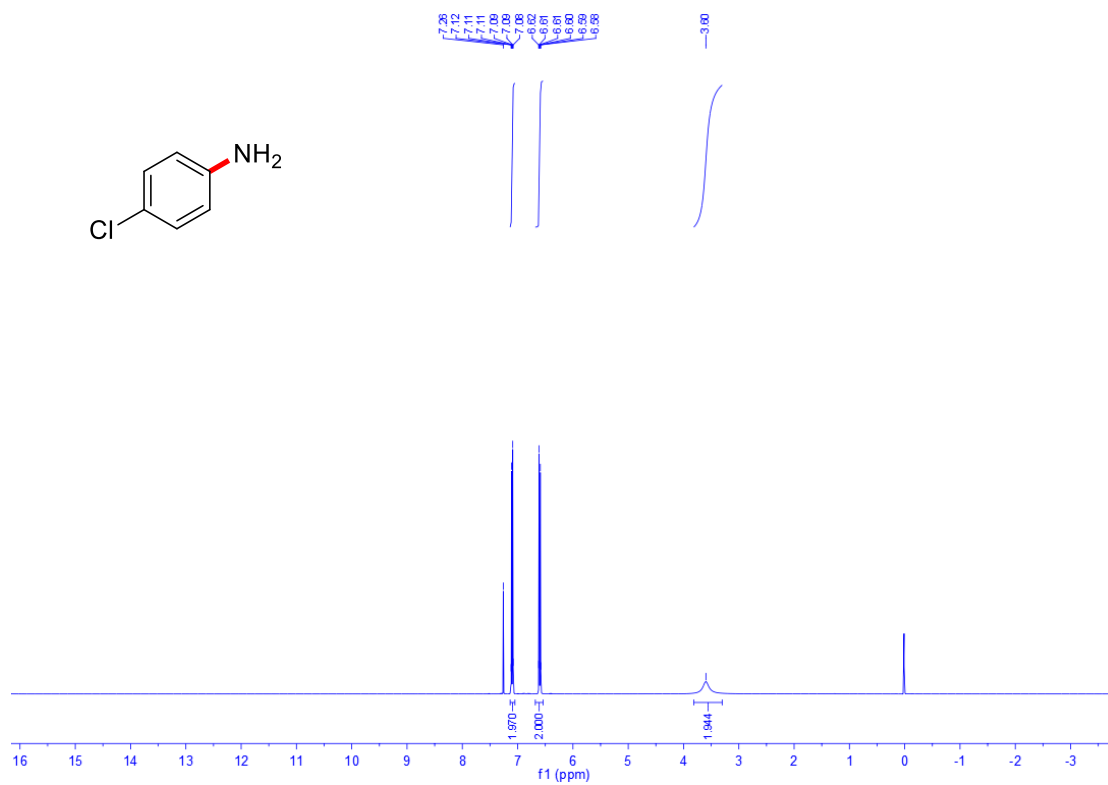

**Figure S7.**  $^1\text{H NMR}$  (400 MHz,  $\text{CDCl}_3$ , 20 °C) of **2c**

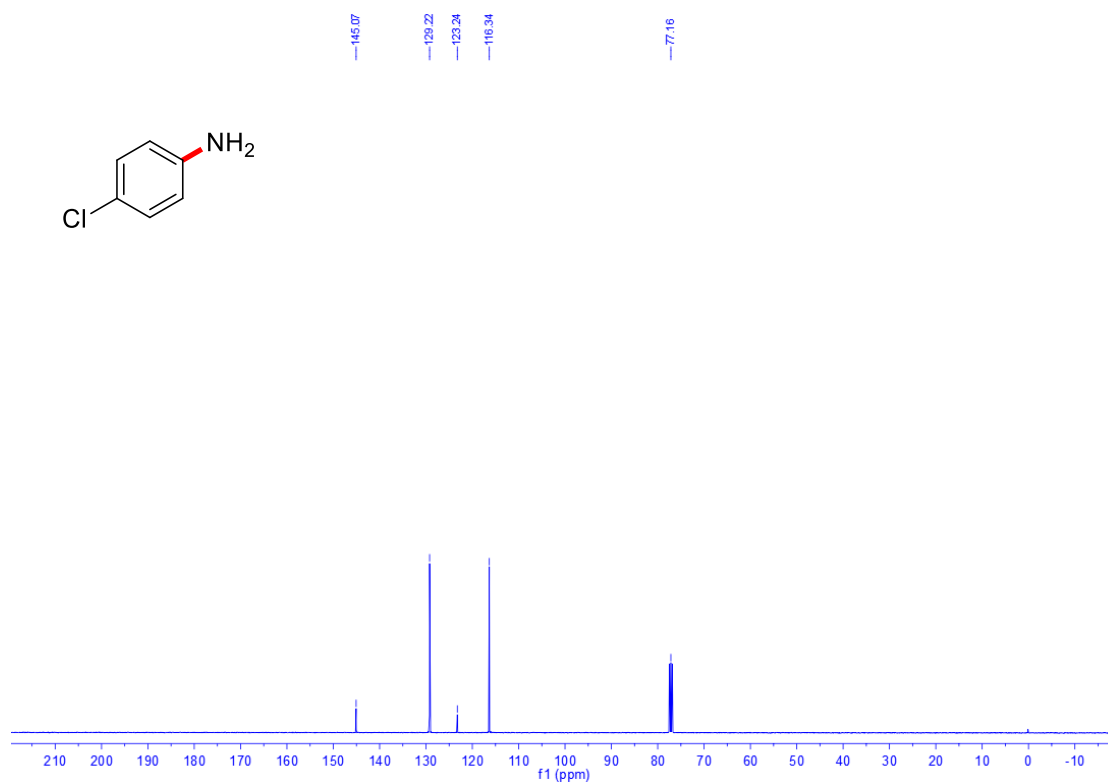

**Figure S8.**  $^{13}\text{C}\{^1\text{H}\}$  (101 MHz,  $\text{CDCl}_3$ , 20 °C) of **2c**

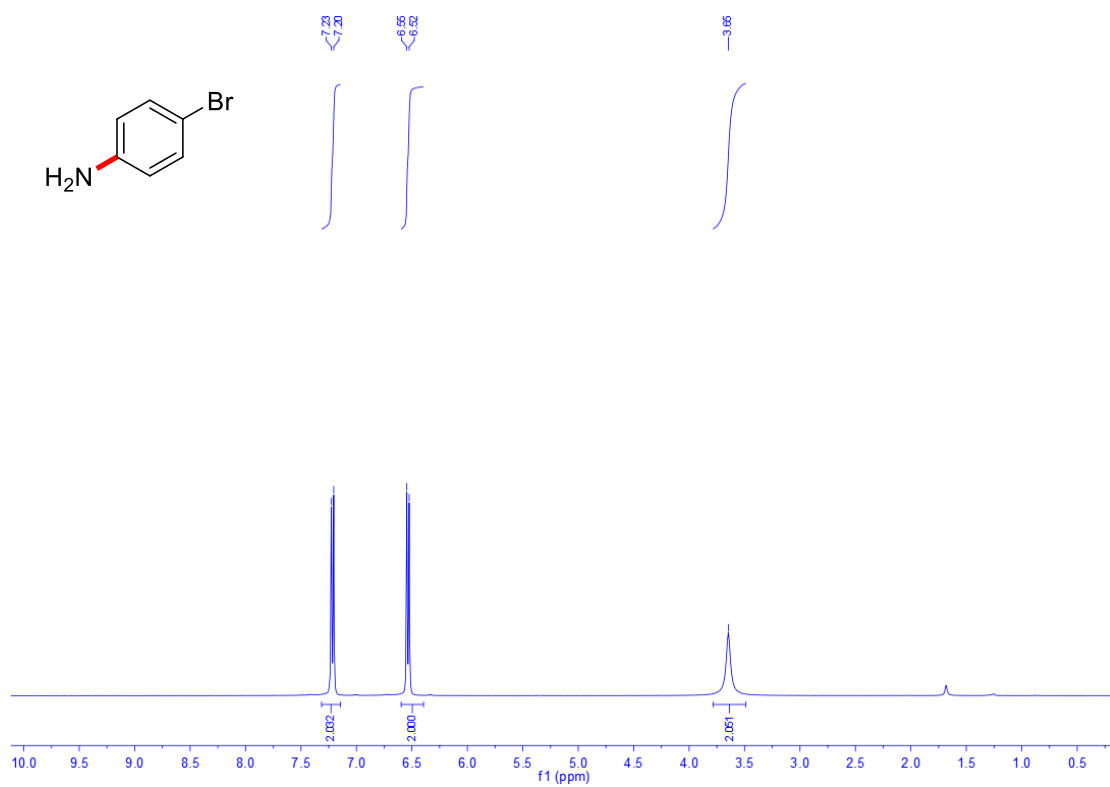

**Figure S9.**  $^1\text{H}$  NMR (400 MHz,  $\text{CDCl}_3$ , 20 °C) of **2d**

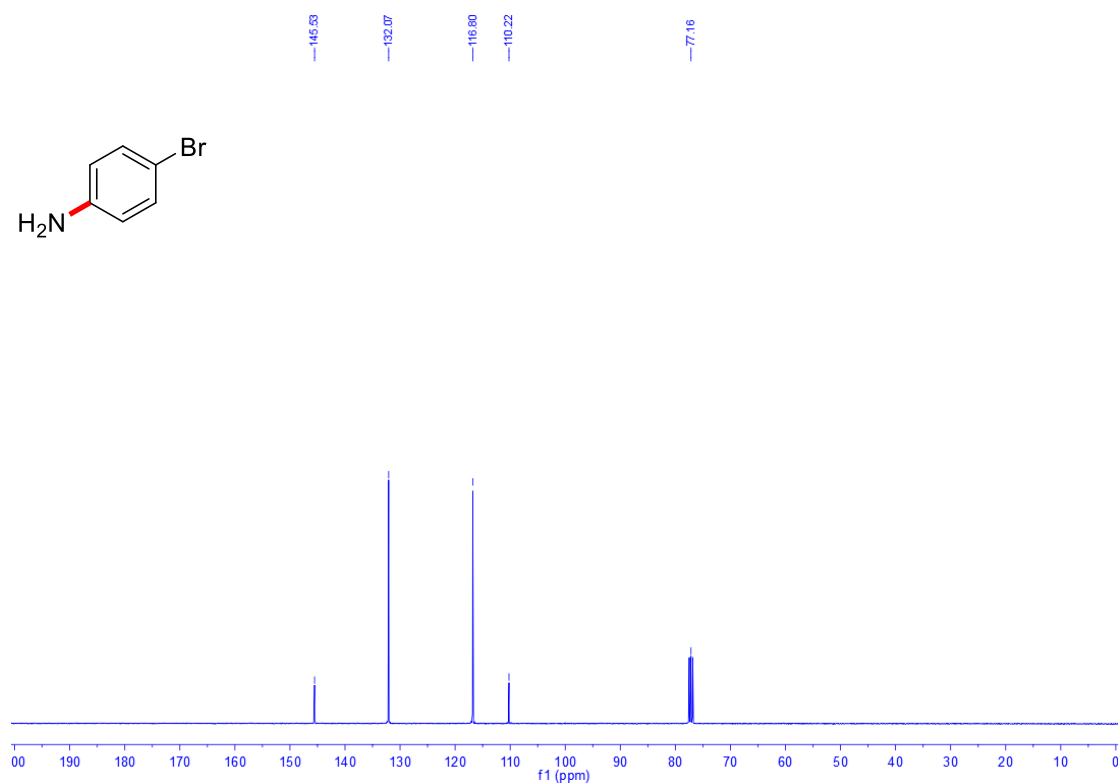

**Figure S10.**  $^{13}\text{C}\{^1\text{H}\}$  (101 MHz,  $\text{CDCl}_3$ , 20 °C) of **2d**

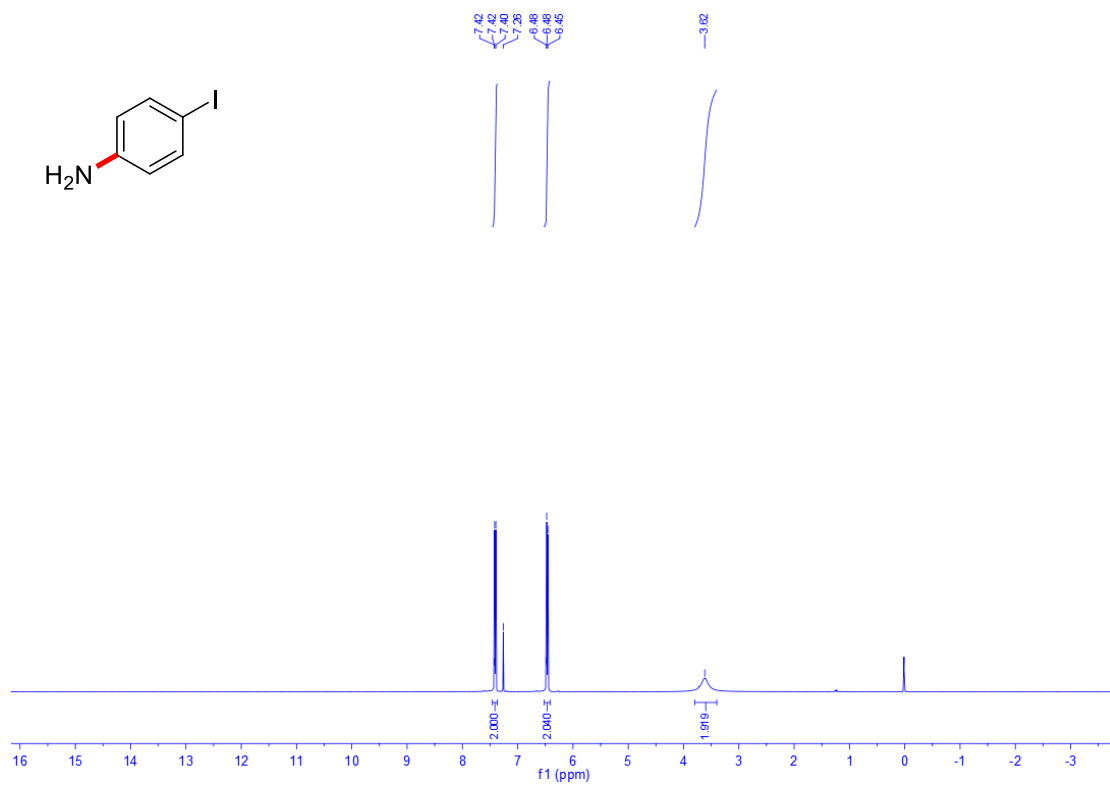

**Figure S11.**  $^1\text{H NMR}$  (400 MHz,  $\text{CDCl}_3$ , 20 °C) of **2e**

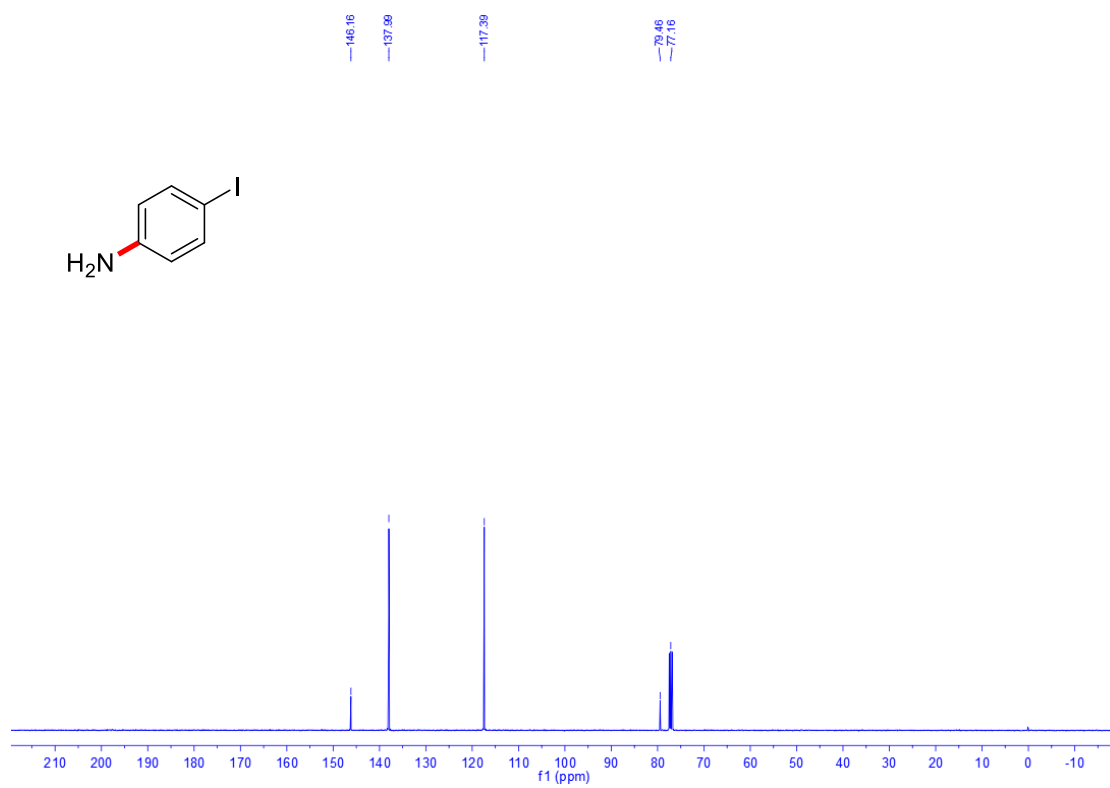

**Figure S12.**  $^{13}\text{C}\{^1\text{H}\}$  (101 MHz,  $\text{CDCl}_3$ , 20 °C) of **2e**

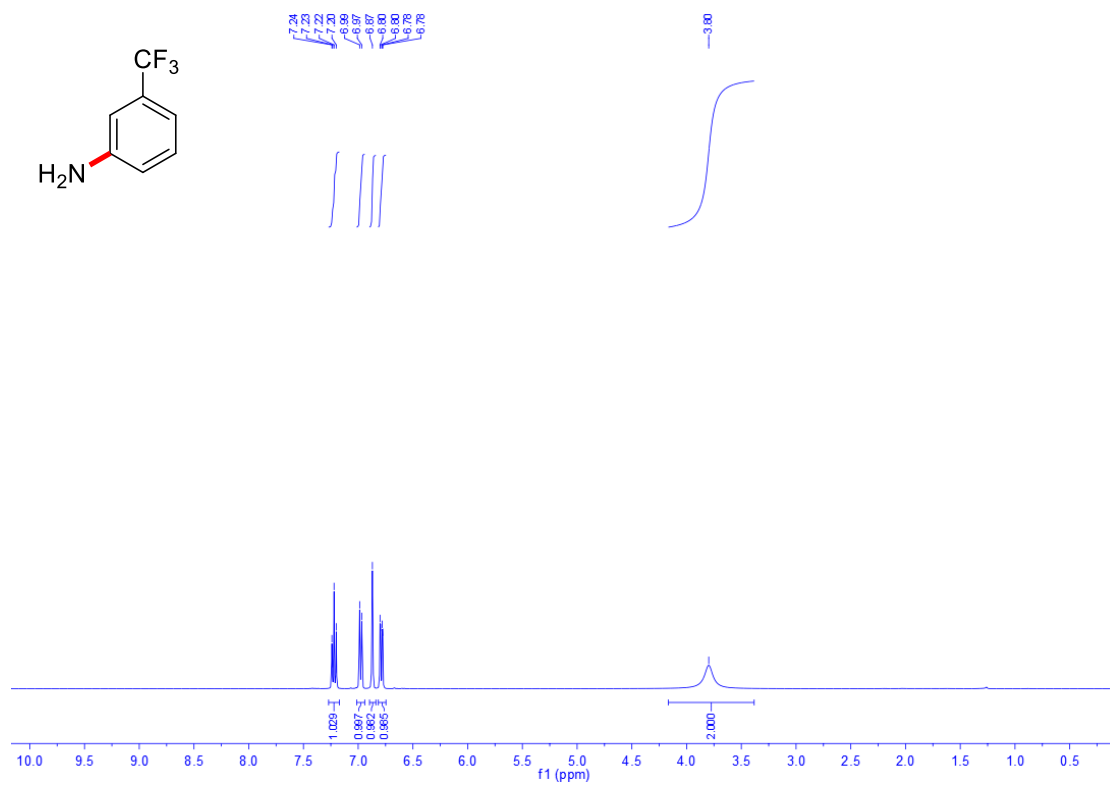

**Figure S13.**  $^1\text{H NMR}$  (400 MHz,  $\text{CDCl}_3$ , 20 °C) of 2f

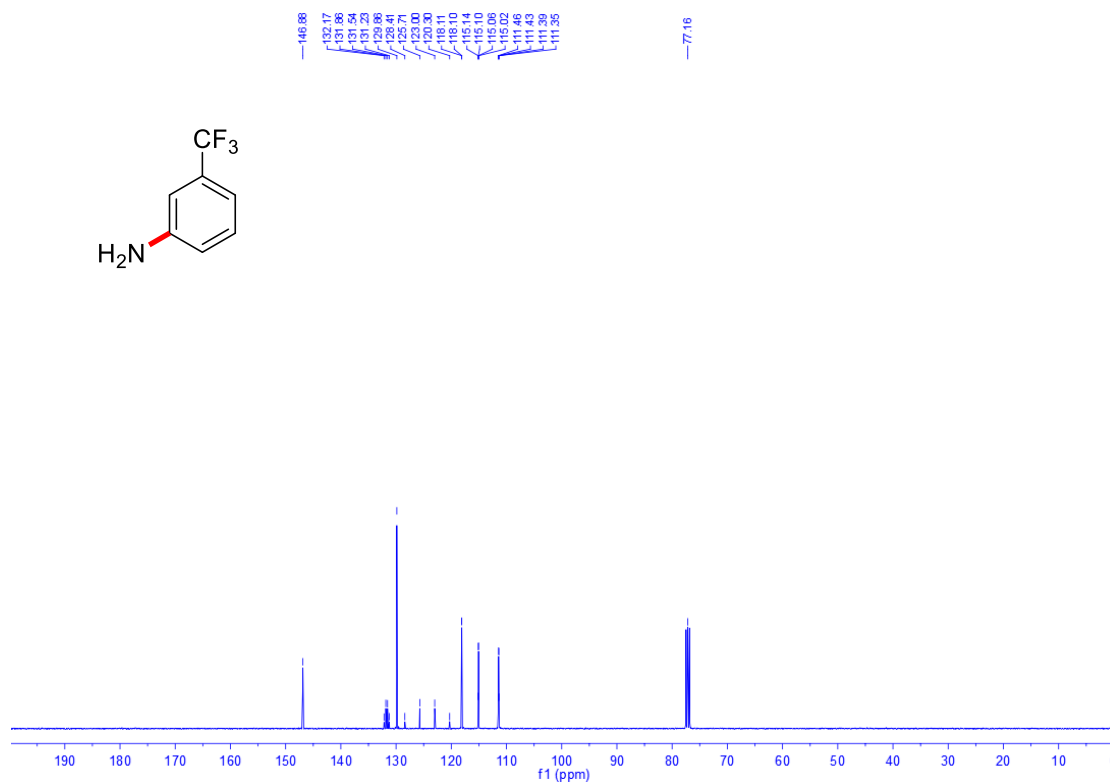

**Figure S14.**  $^{13}\text{C}\{^1\text{H}\}$  (101 MHz,  $\text{CDCl}_3$ , 20 °C) of 2f



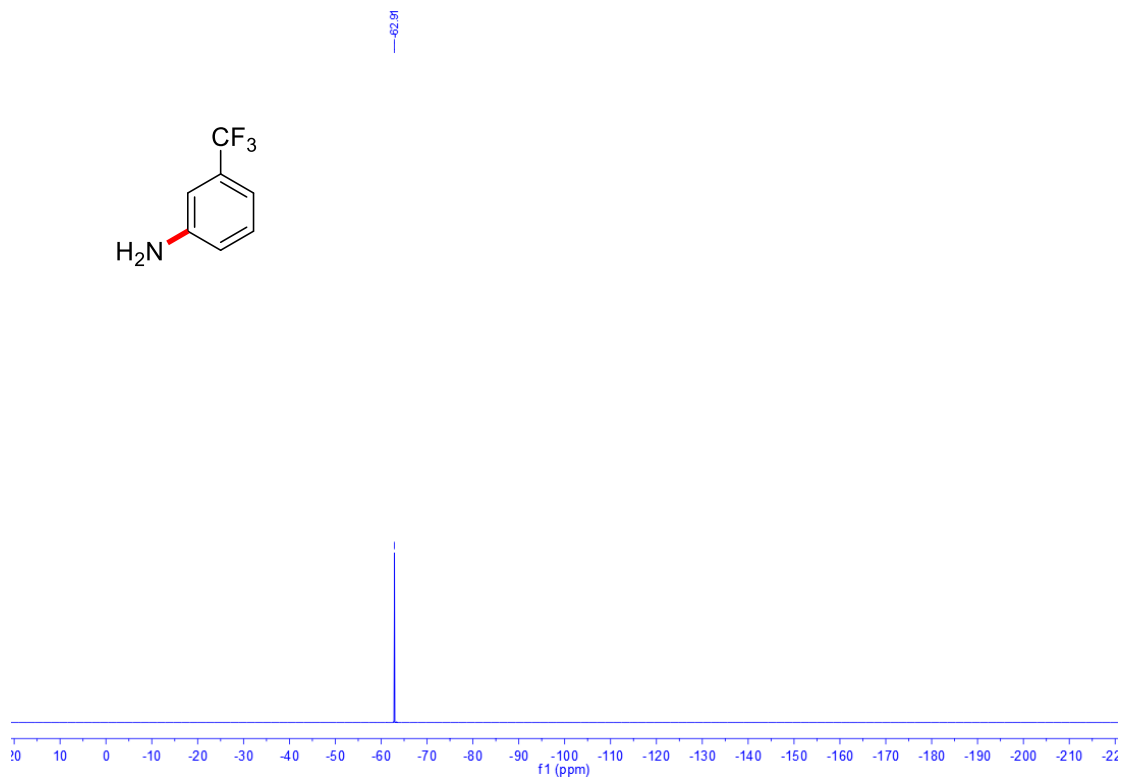

**Figure S15.**  $^{19}\text{F}$  NMR (377 MHz,  $\text{CDCl}_3$ , 20 °C) of 2f

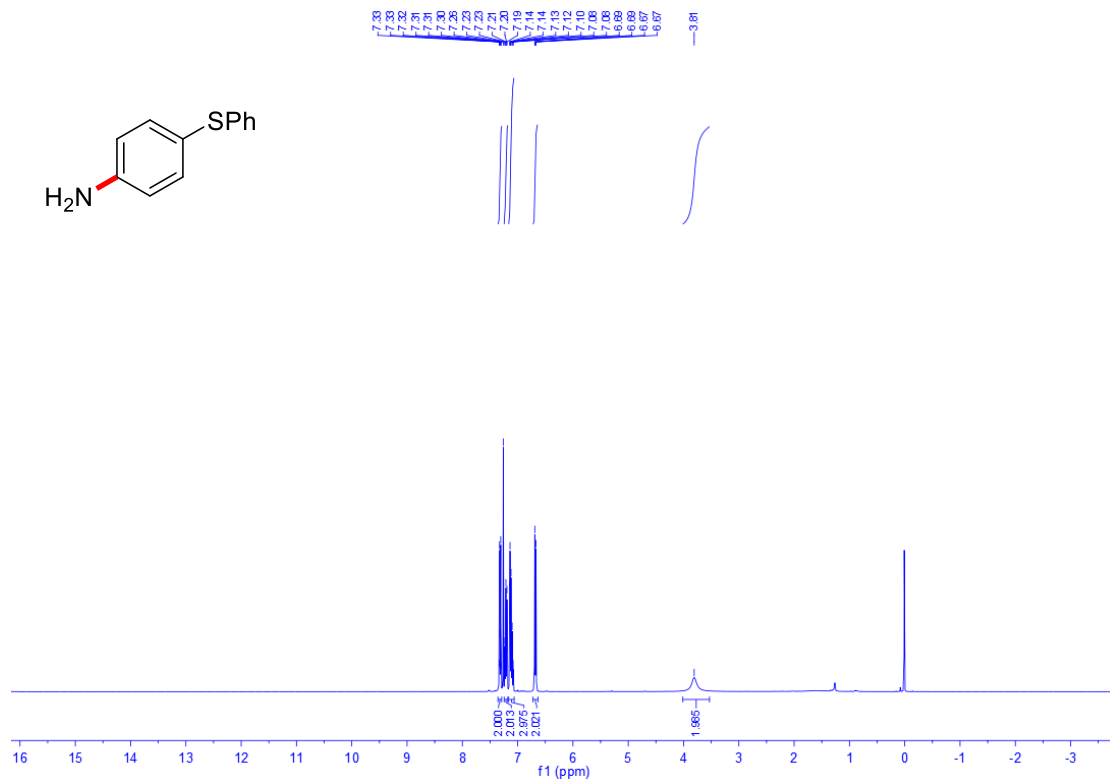

**Figure S16.**  $^1\text{H}$  NMR (400 MHz,  $\text{CDCl}_3$ , 20 °C) of 2g

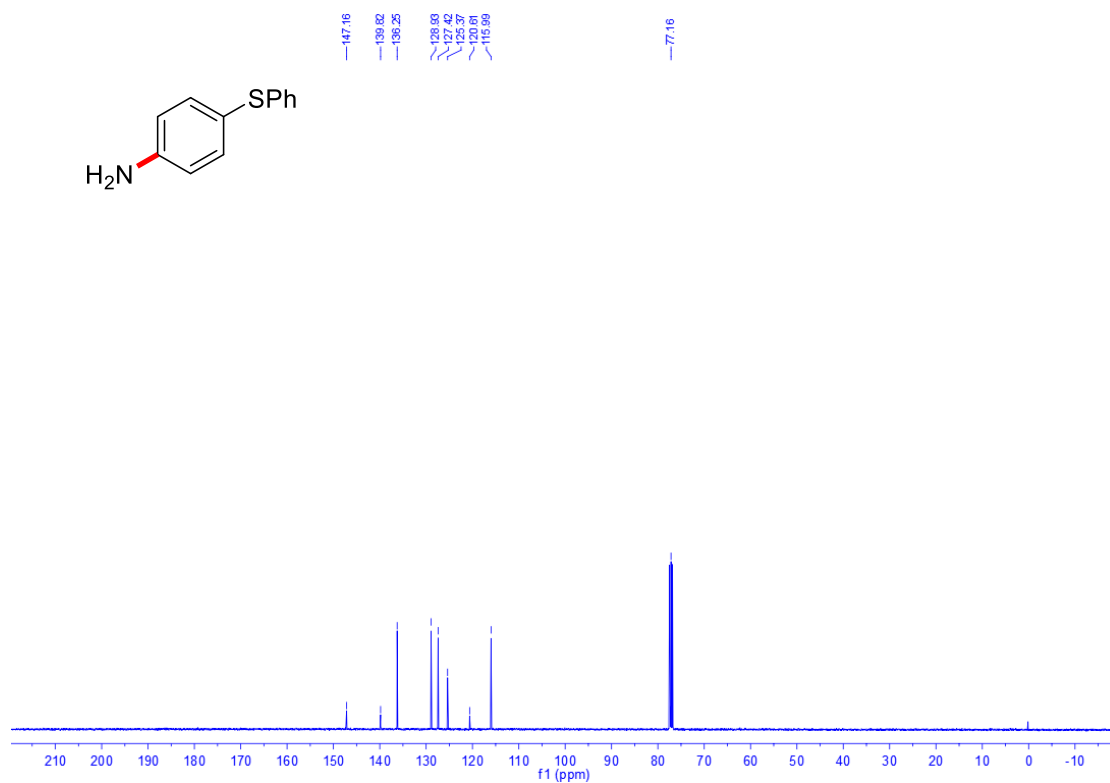

**Figure S17.**  $^{13}\text{C}\{^1\text{H}\}$  (101 MHz,  $\text{CDCl}_3$ , 20 °C) of **2g**

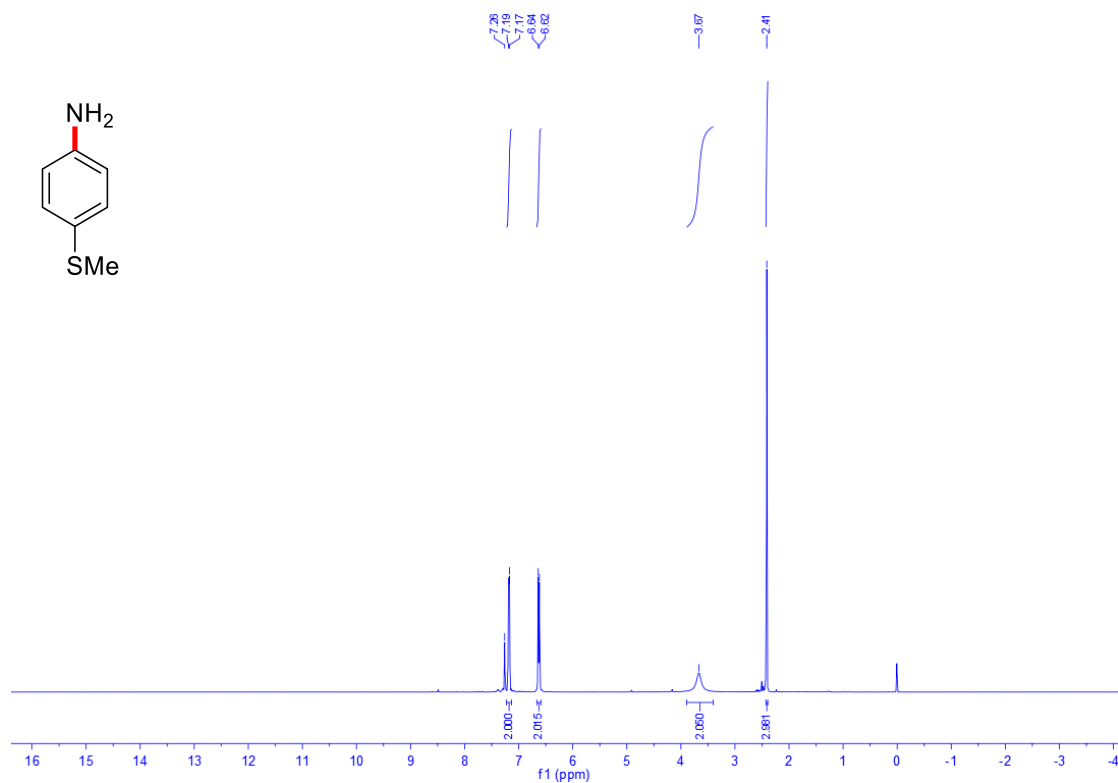

**Figure S18.**  $^1\text{H}$  NMR (400 MHz,  $\text{CDCl}_3$ , 20 °C) of **2h**

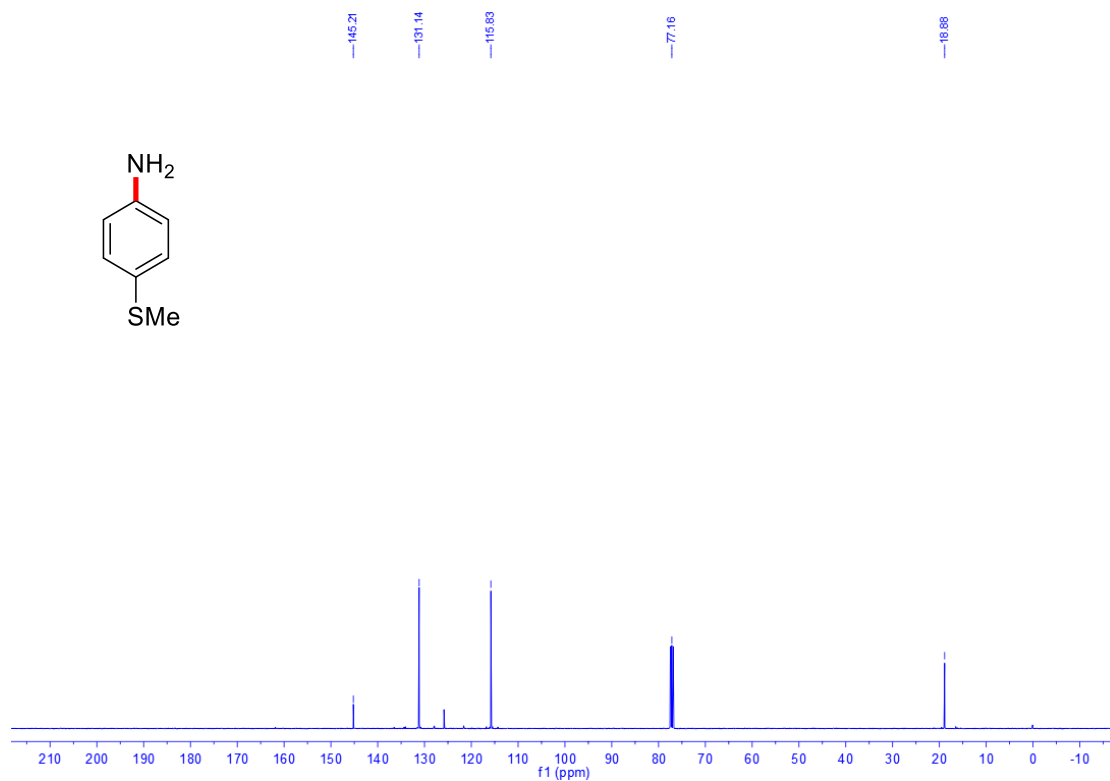

Figure S19.  $^{13}\text{C}\{^1\text{H}\}$  (101 MHz,  $\text{CDCl}_3$ , 20 °C) of **2h**

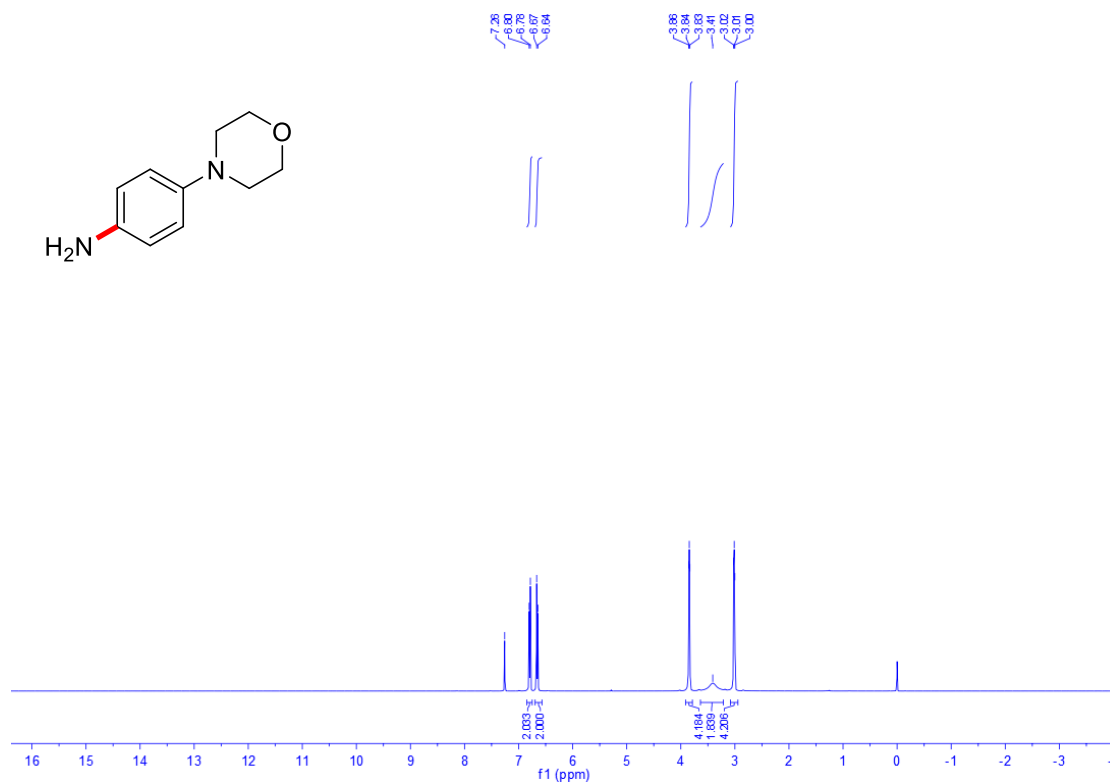

Figure S20.  $^1\text{H}$  NMR (400 MHz,  $\text{CDCl}_3$ , 20 °C) of **2i**

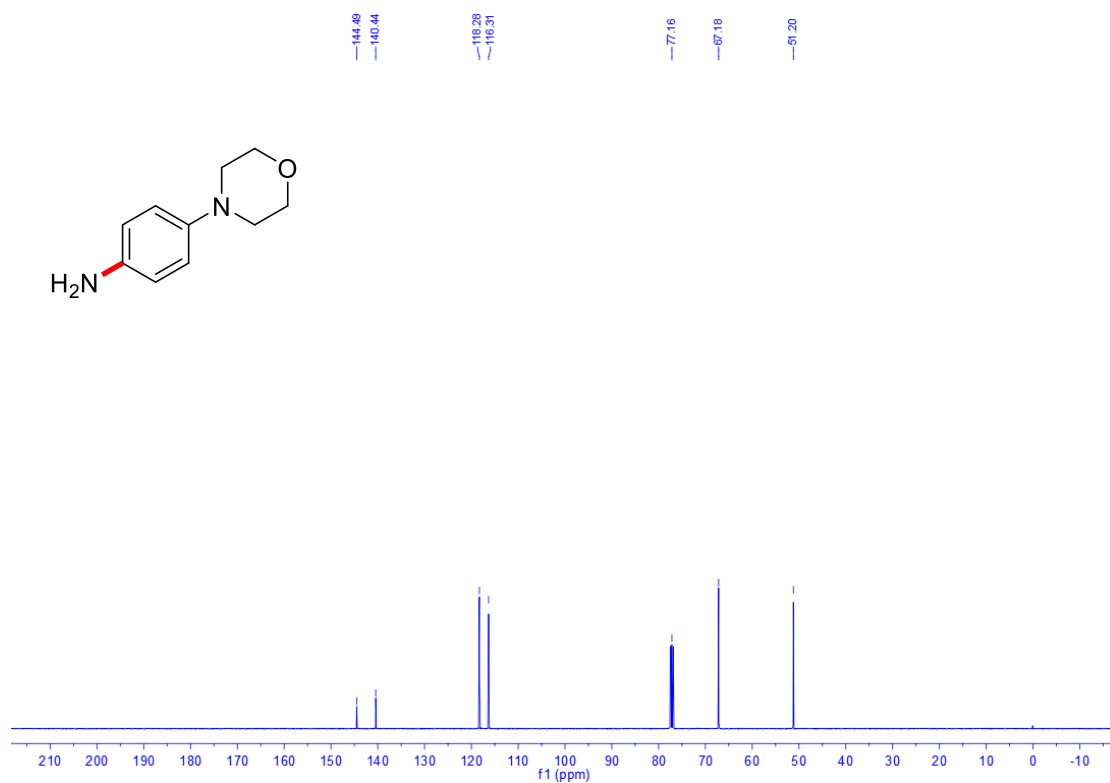

**Figure S21.**  $^{13}\text{C}\{^1\text{H}\}$  (101 MHz,  $\text{CDCl}_3$ , 20 °C) of **2i**

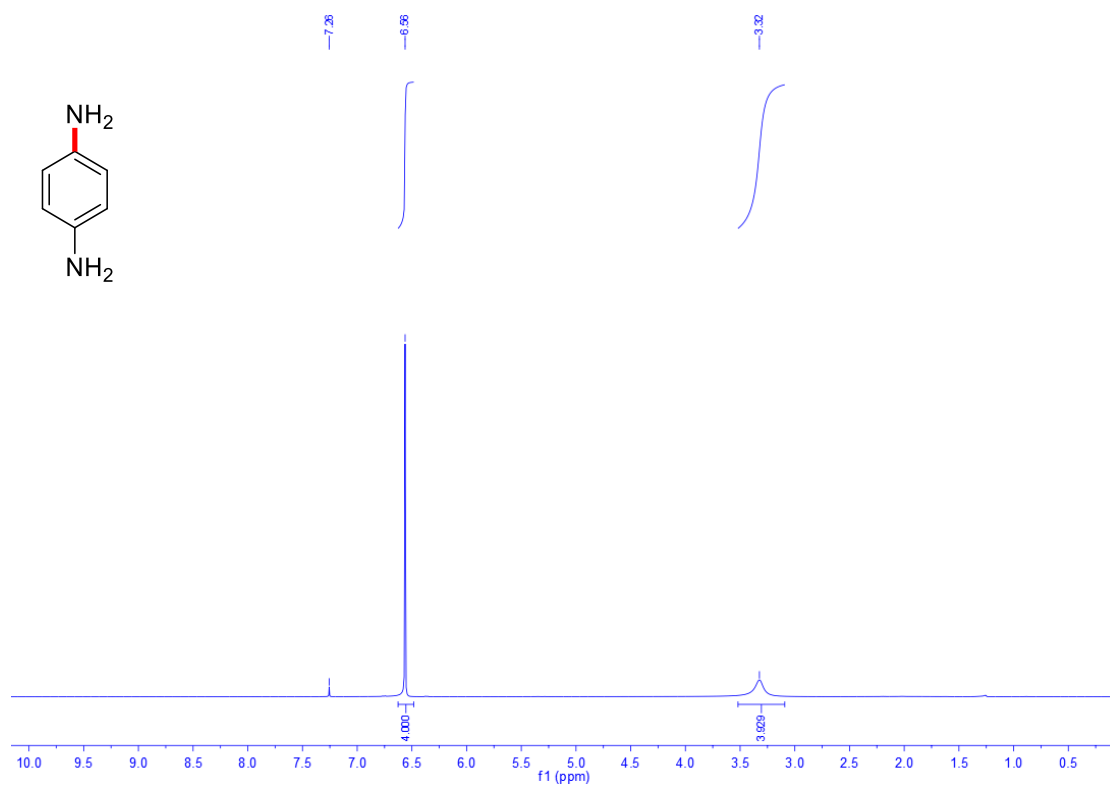

**Figure S22.**  $^1\text{H}$  NMR (400 MHz,  $\text{CDCl}_3$ , 20 °C) of **2j**

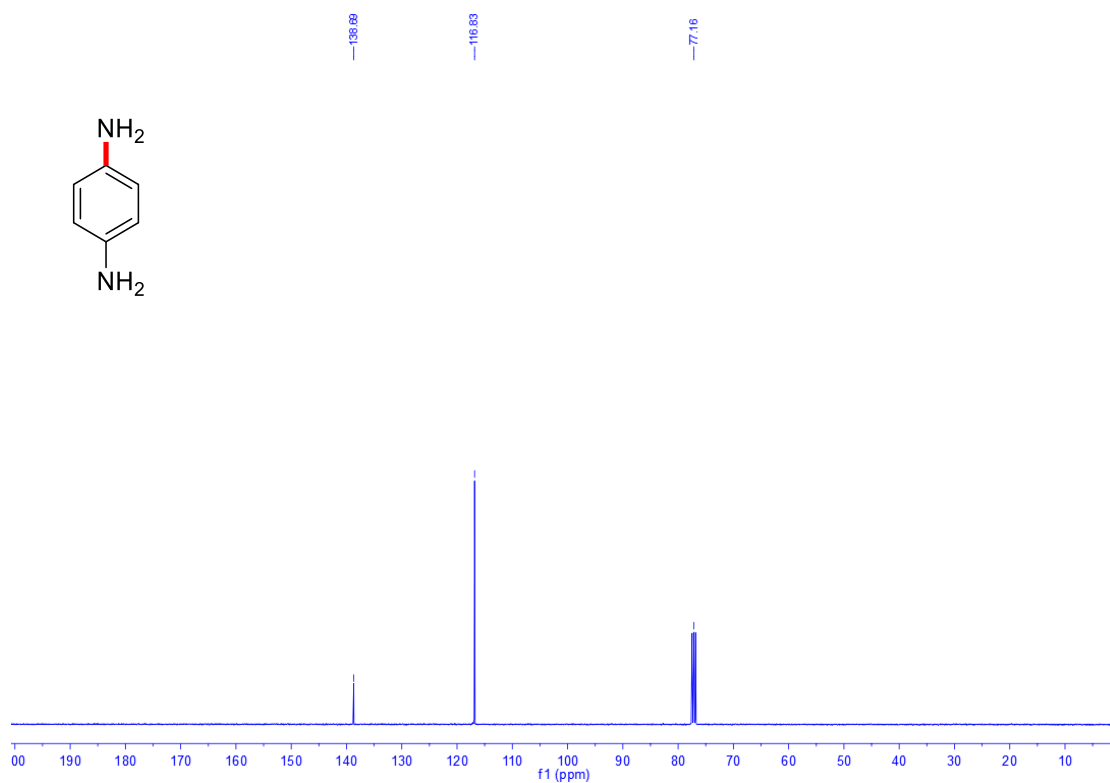

**Figure S23.**  $^{13}\text{C}\{^1\text{H}\}$  (101 MHz,  $\text{CDCl}_3$ , 20 °C) of **2j**

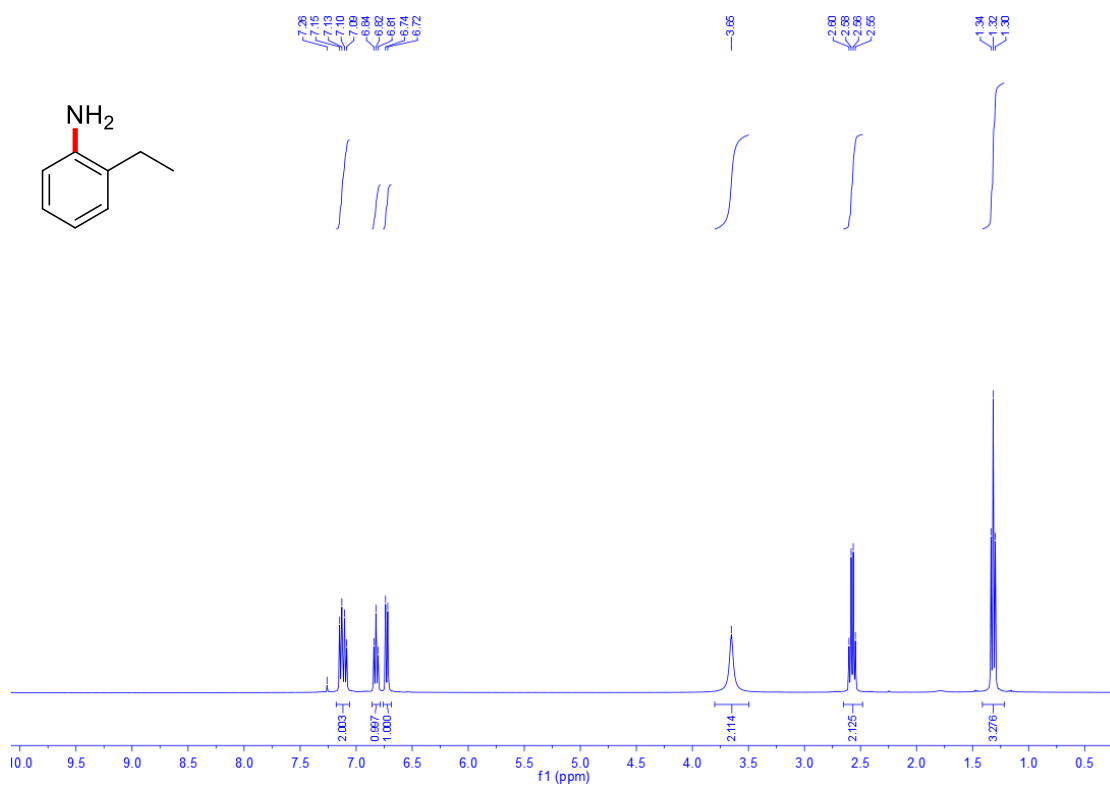

**Figure S24.**  $^1\text{H}$  NMR (400 MHz,  $\text{CDCl}_3$ , 20 °C) of **2k**

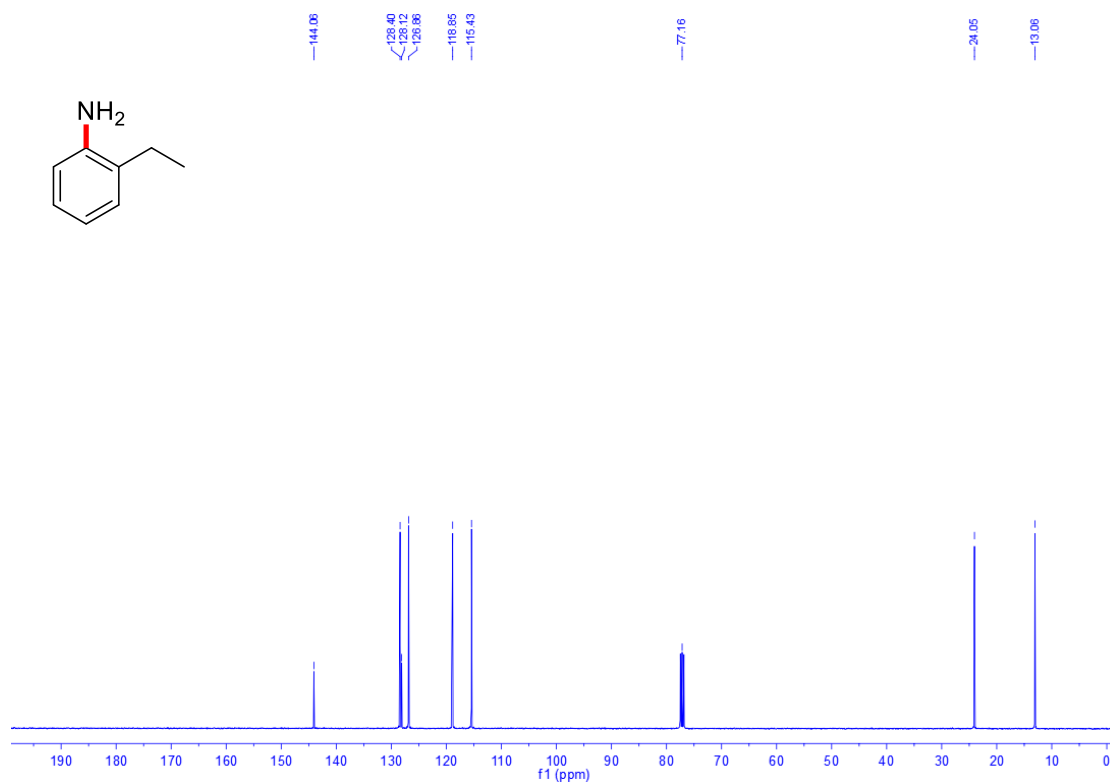

Figure S25.  $^{13}\text{C}\{^1\text{H}\}$  (101 MHz,  $\text{CDCl}_3$ , 20 °C) of **2k**

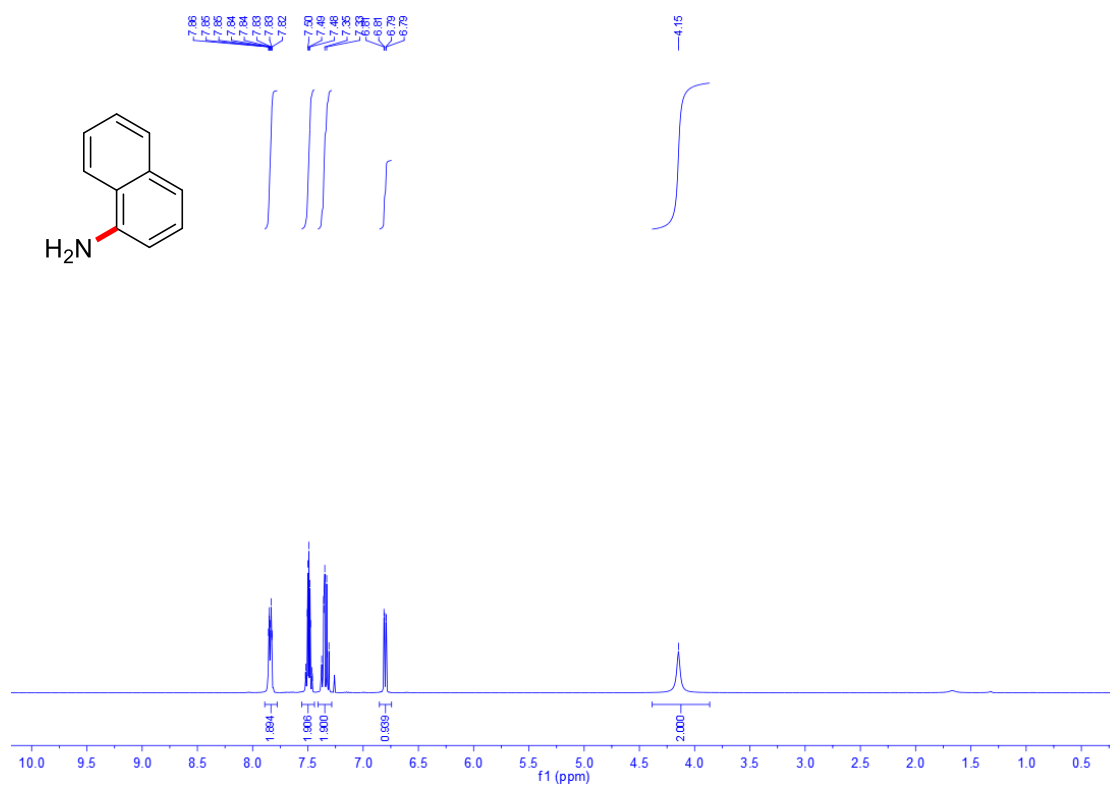

Figure S26.  $^1\text{H}$  NMR (400 MHz,  $\text{CDCl}_3$ , 20 °C) of **2l**

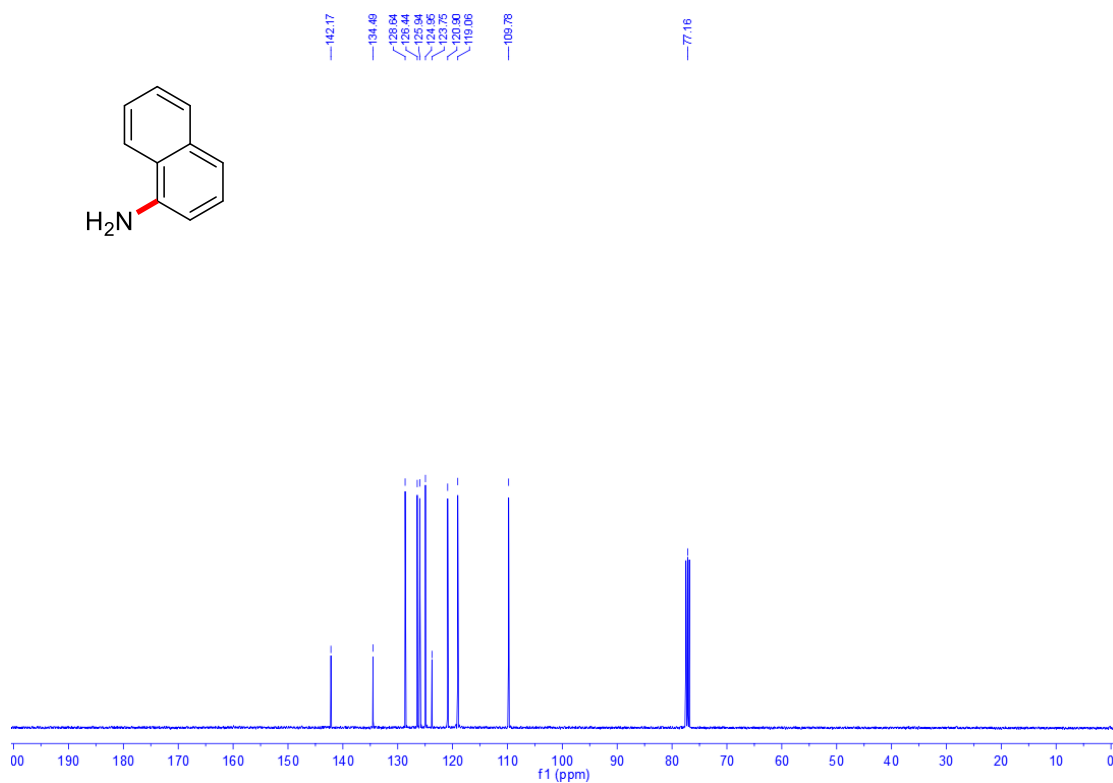

**Figure S27.**  $^{13}\text{C}\{^1\text{H}\}$  (101 MHz,  $\text{CDCl}_3$ , 20 °C) of **21**

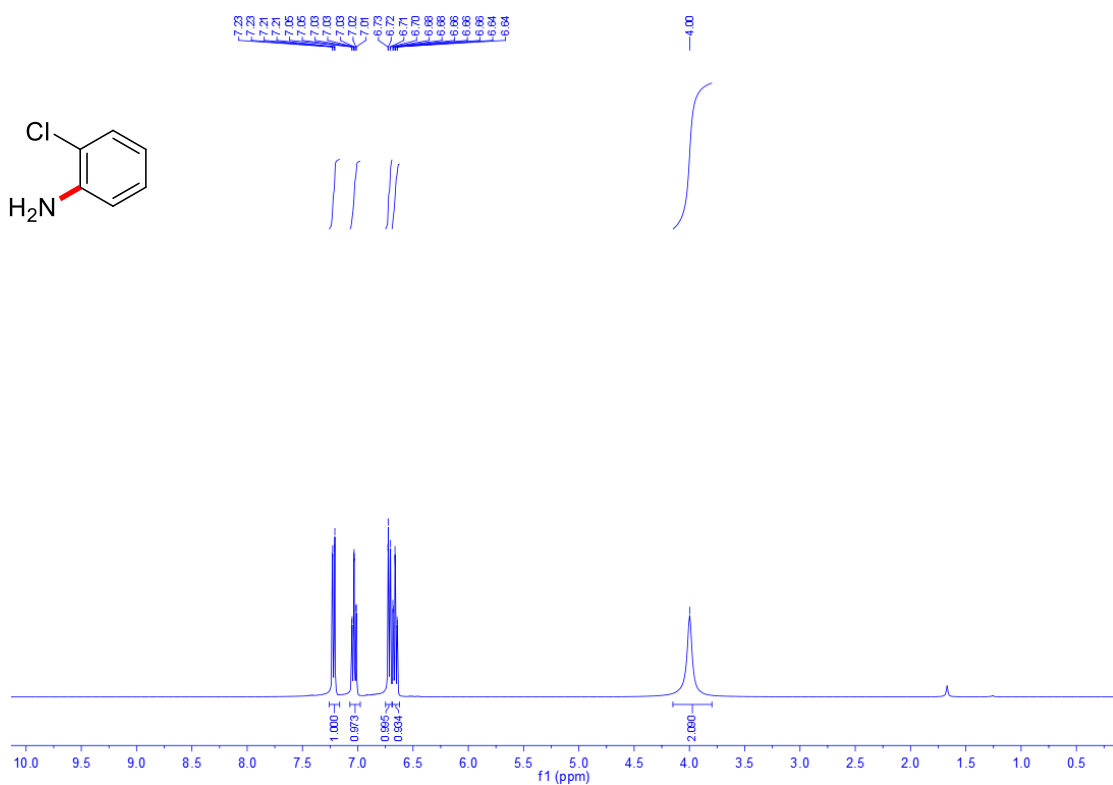

**Figure S28.**  $^1\text{H}$  NMR (400 MHz,  $\text{CDCl}_3$ , 20 °C) of **2m**

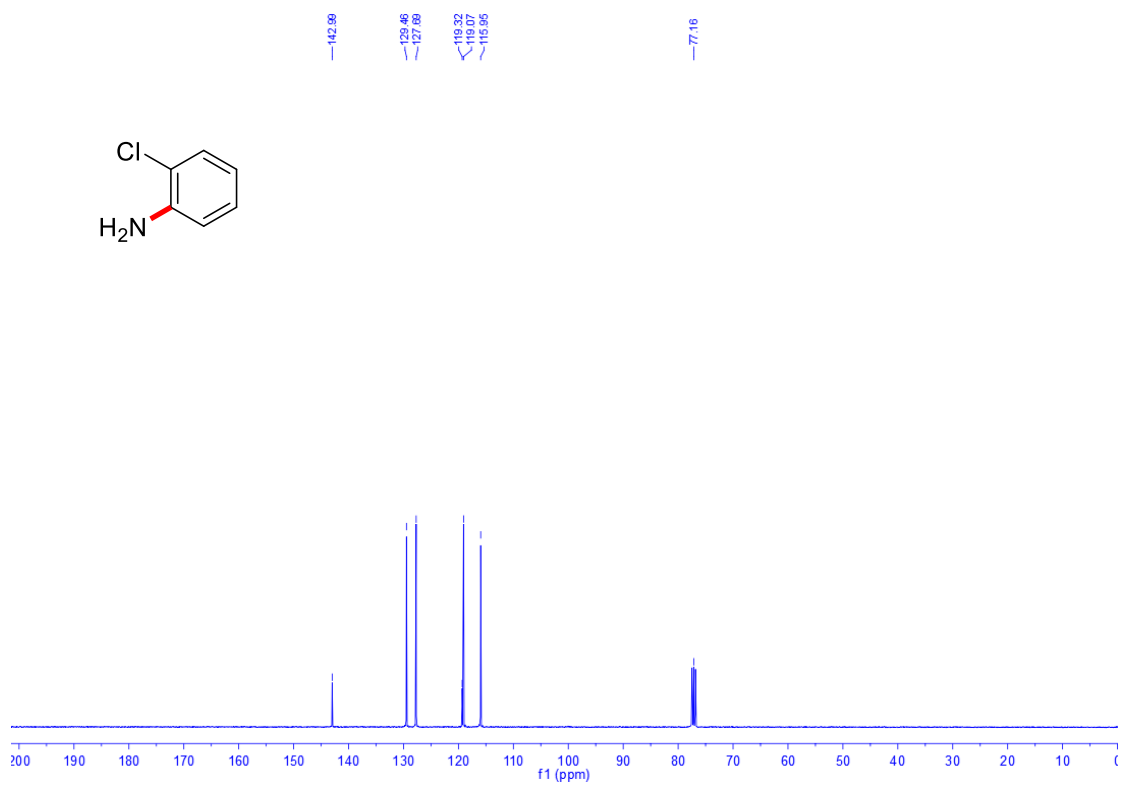

Figure S29.  $^{13}\text{C}\{^1\text{H}\}$  (101 MHz,  $\text{CDCl}_3$ , 20 °C) of **2m**

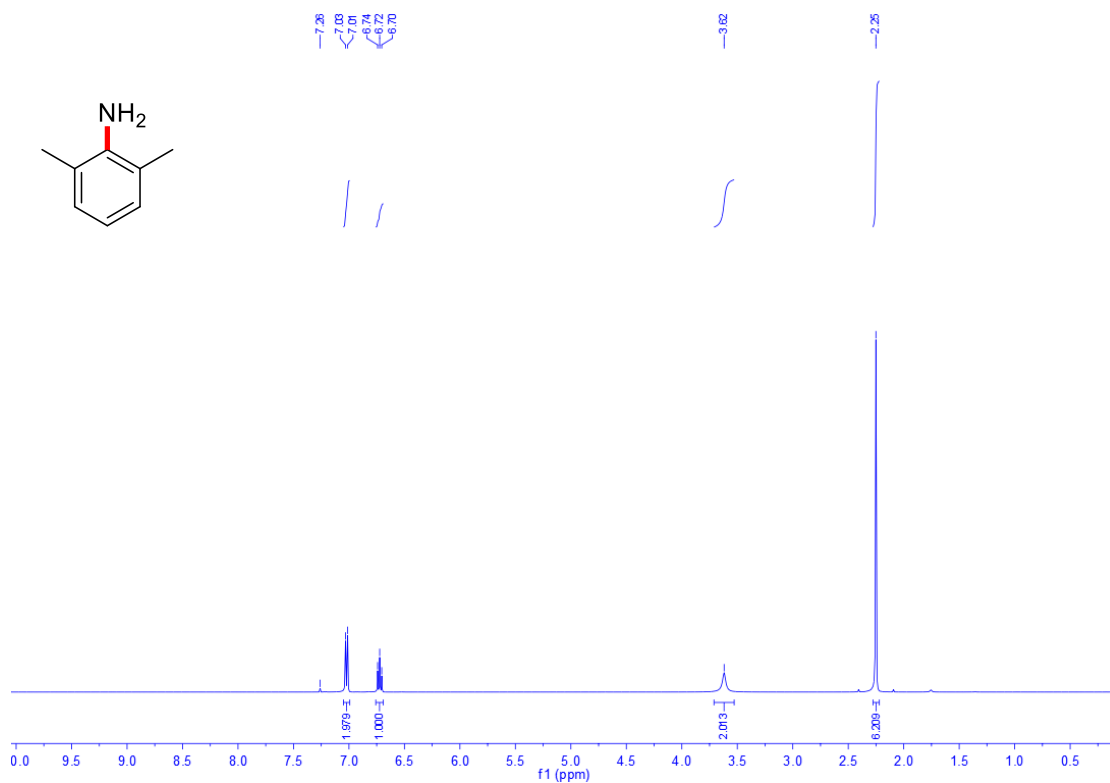

Figure S30.  $^1\text{H}$  NMR (400 MHz,  $\text{CDCl}_3$ , 20 °C) of **2n**



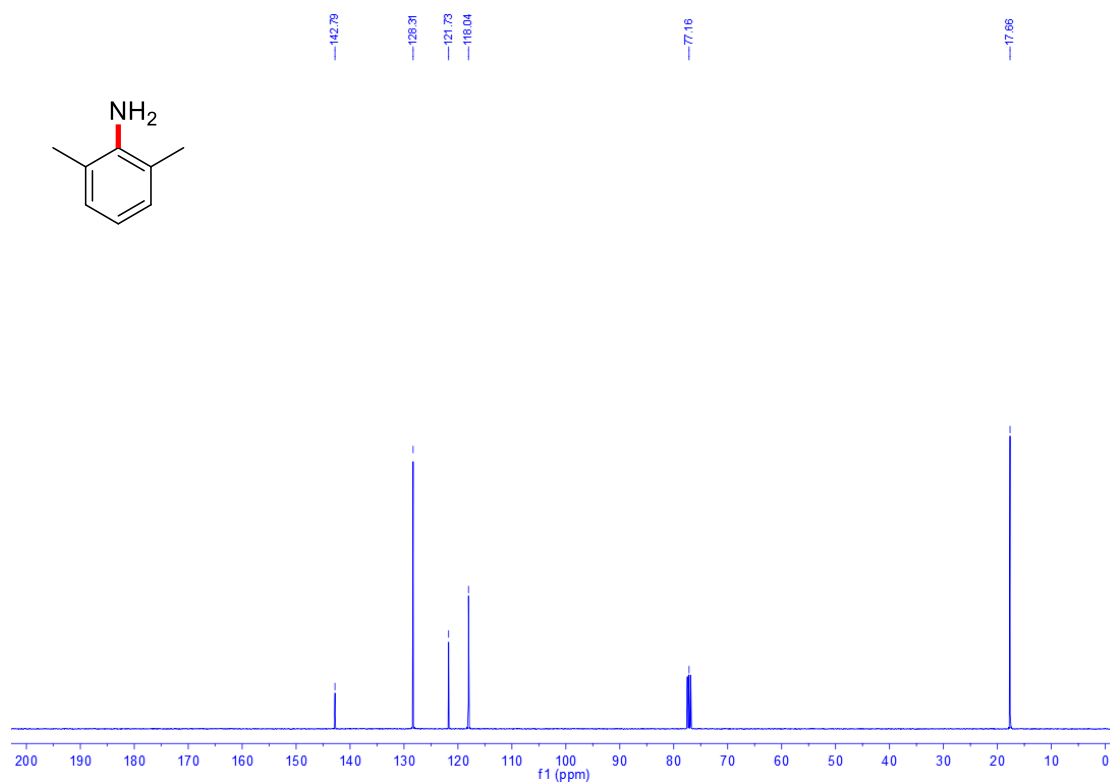

**Figure S31.**  $^{13}\text{C}\{^1\text{H}\}$  (101 MHz,  $\text{CDCl}_3$ , 20 °C) of **2n**

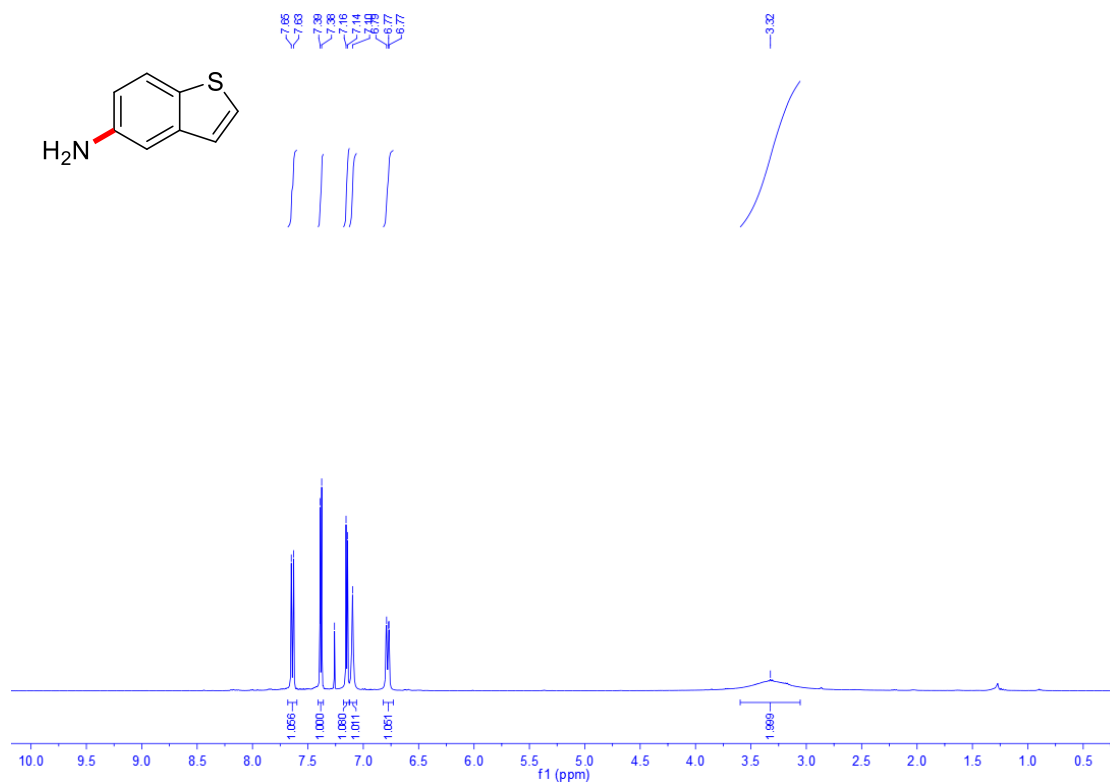

**Figure S32.**  $^1\text{H}$  NMR (400 MHz,  $\text{CDCl}_3$ , 20 °C) of **2o**

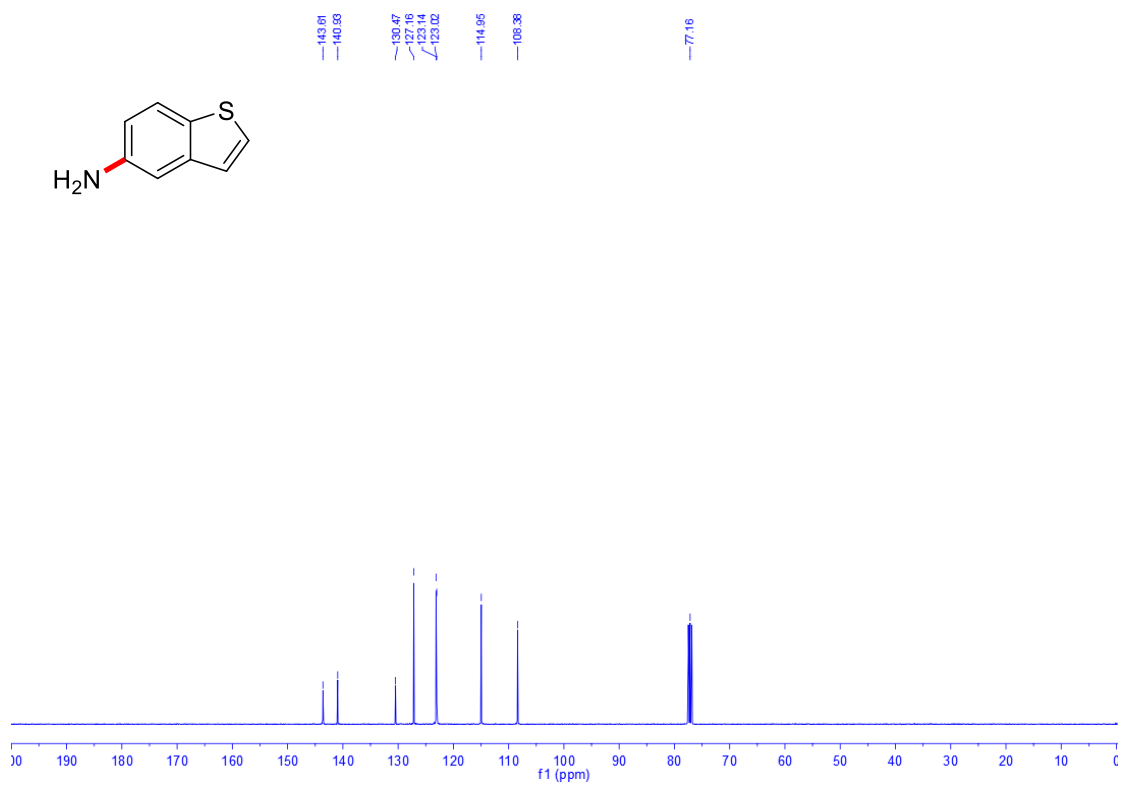

Figure S33.  $^{13}\text{C}\{^1\text{H}\}$  (101 MHz,  $\text{CDCl}_3$ , 20 °C) of 2o

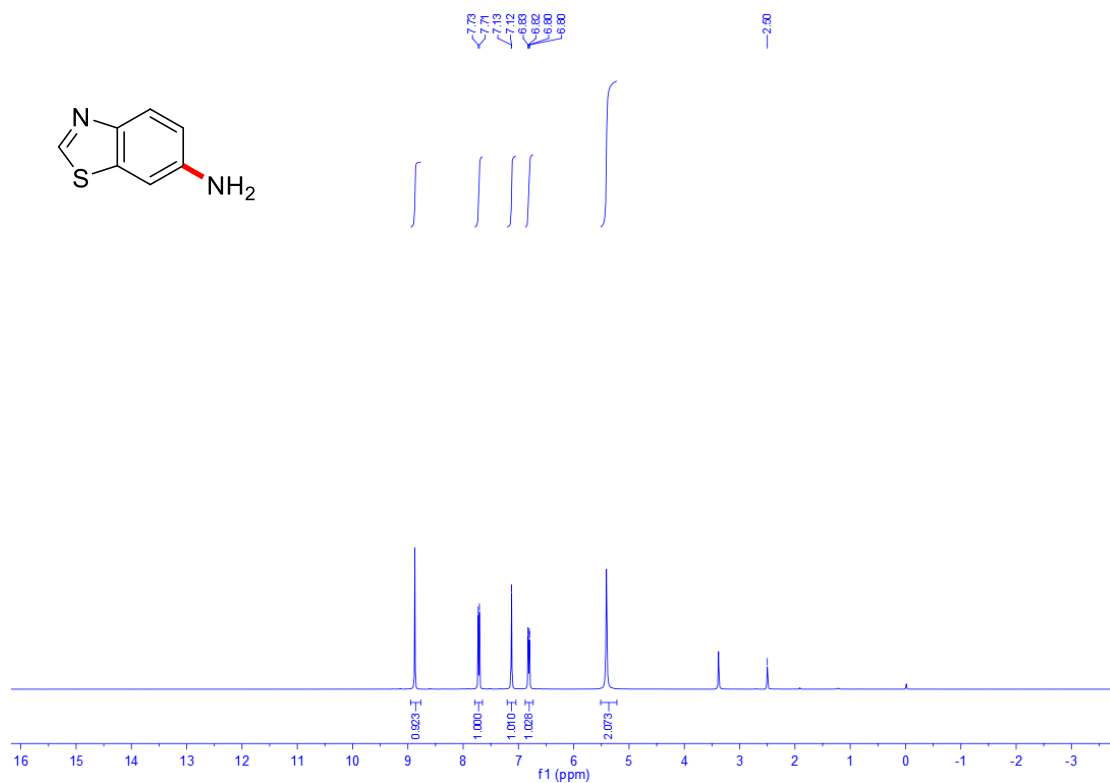

Figure S34.  $^1\text{H}$  NMR (400 MHz,  $\text{DMSO}-d_6$ , 20 °C) of 2p

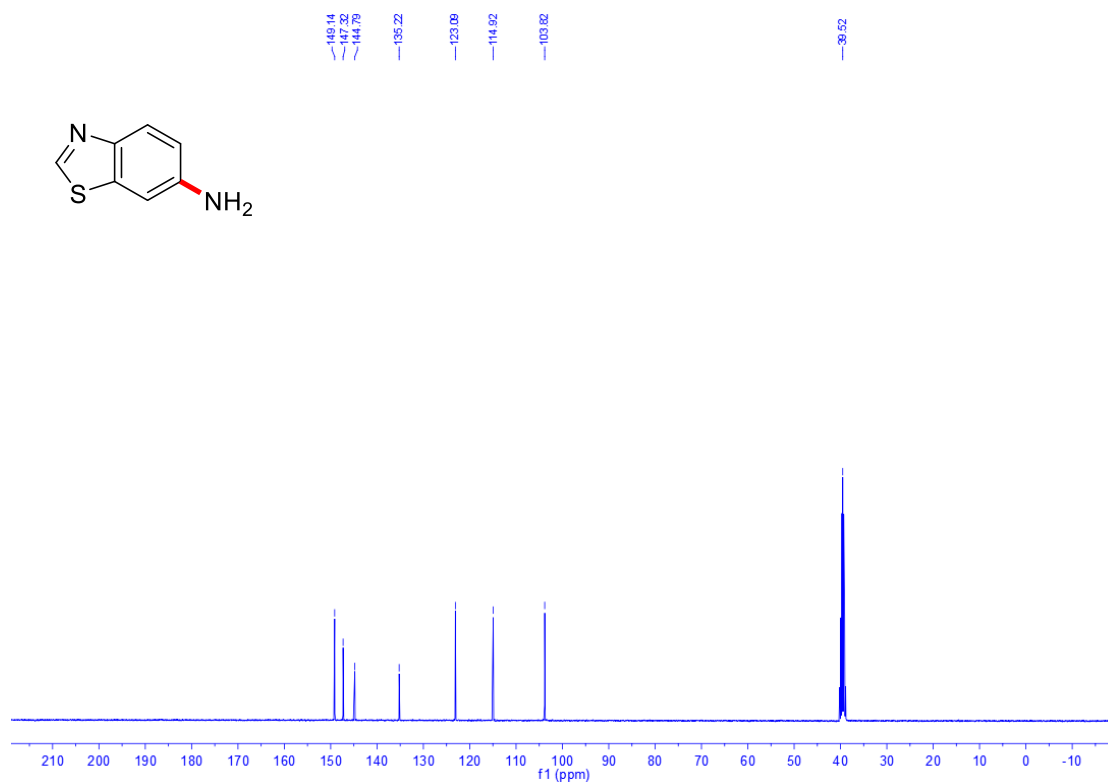

Figure S35.  $^{13}\text{C}\{^1\text{H}\}$  (101 MHz,  $\text{DMSO-}d_6$ , 20 °C) of **2p**

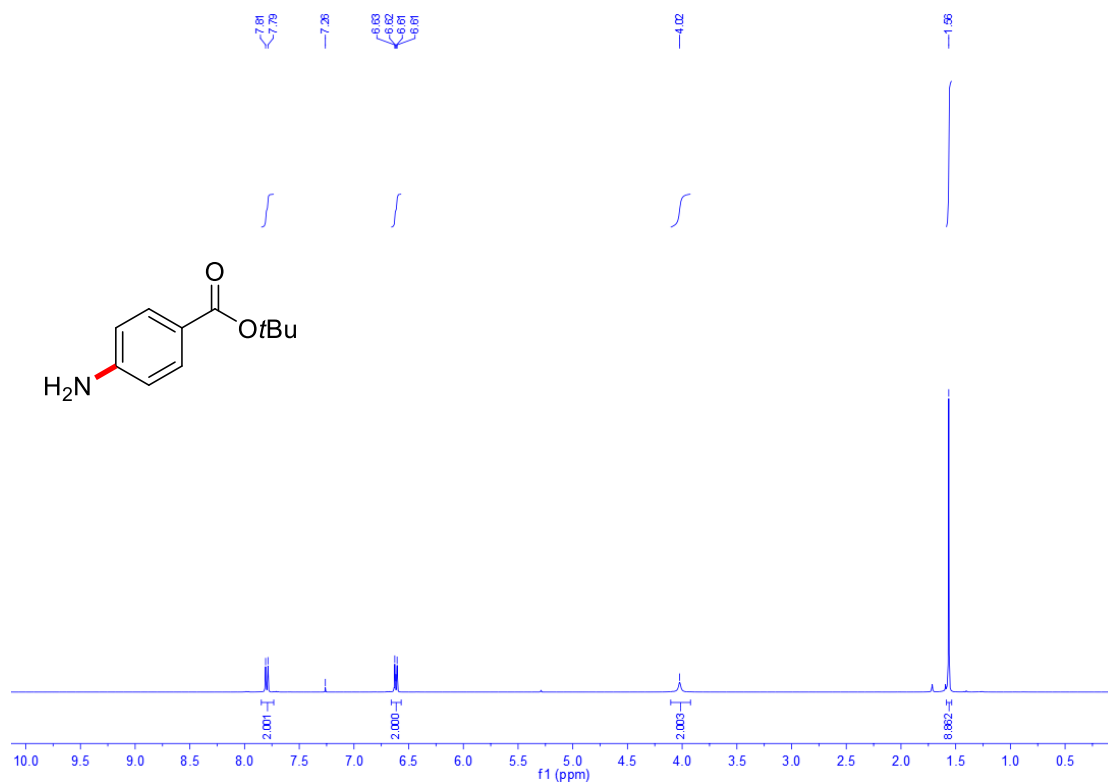

Figure S36.  $^1\text{H}$  NMR (400 MHz,  $\text{CDCl}_3$ , 20 °C) of **2q**

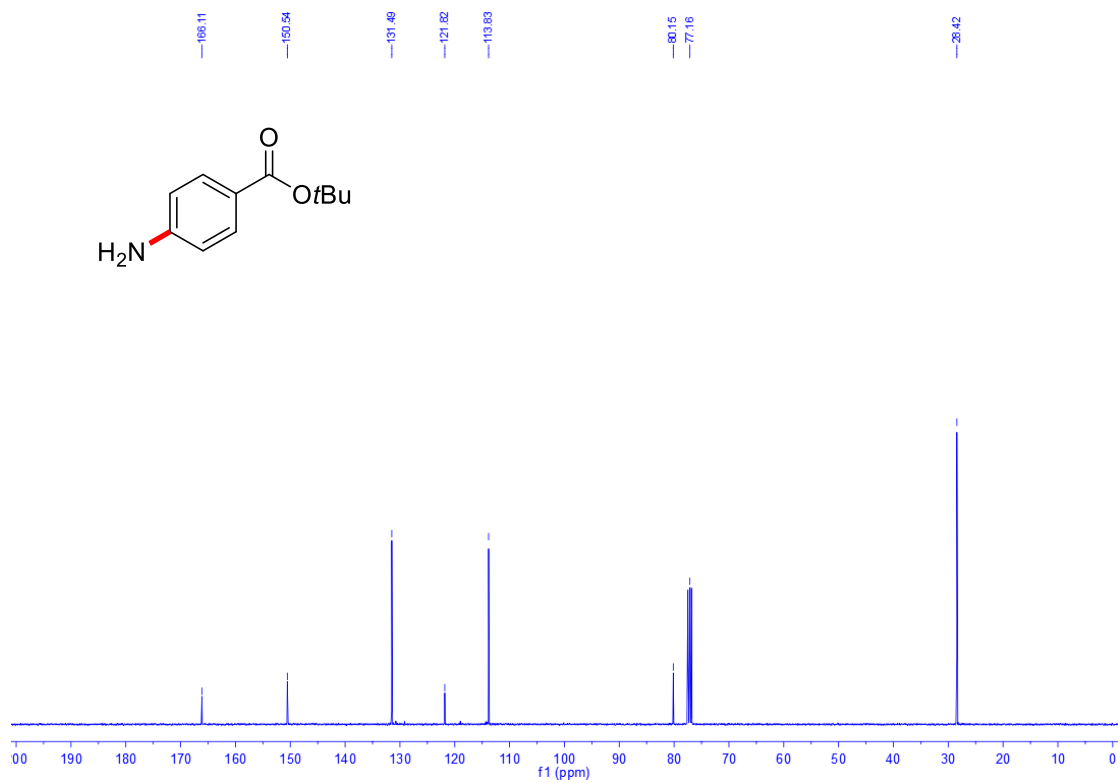

**Figure S37.**  $^{13}\text{C}\{^1\text{H}\}$  (101 MHz,  $\text{CDCl}_3$ , 20 °C) of **2q**

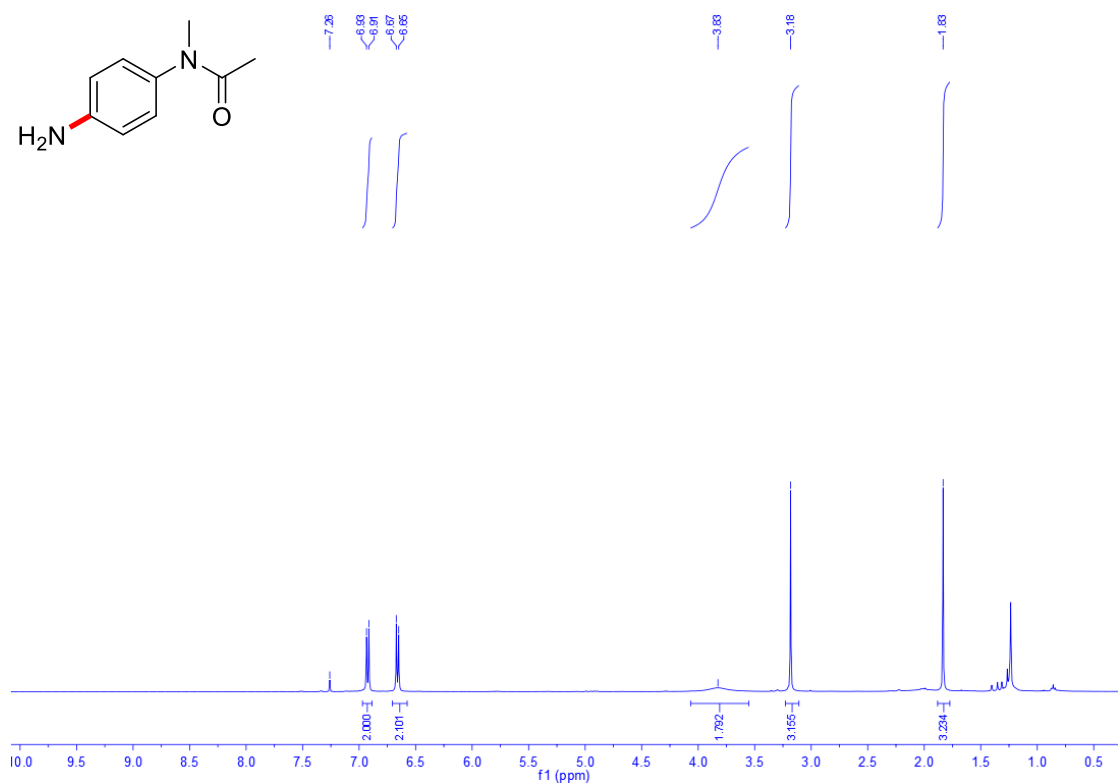

**Figure S38.**  $^1\text{H}$  NMR (400 MHz,  $\text{CDCl}_3$ , 20 °C) of **2r**

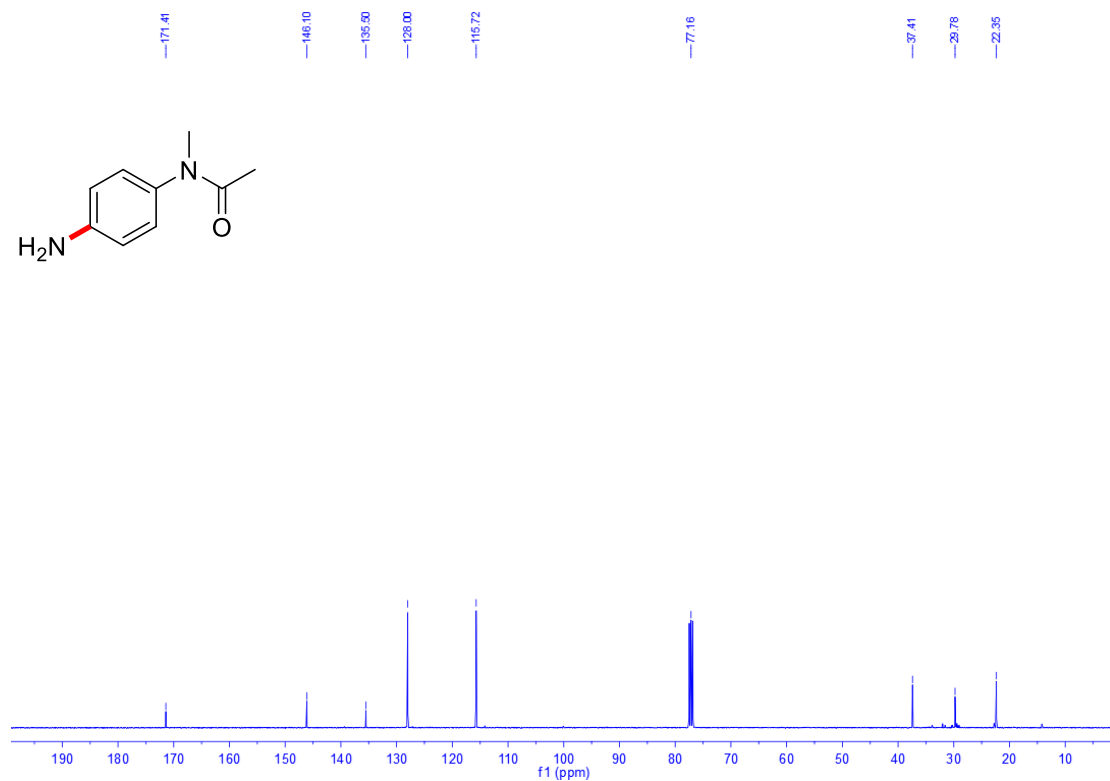

**Figure S39.**  $^{13}\text{C}\{^1\text{H}\}$  (101 MHz,  $\text{CDCl}_3$ , 20 °C) of **2r**

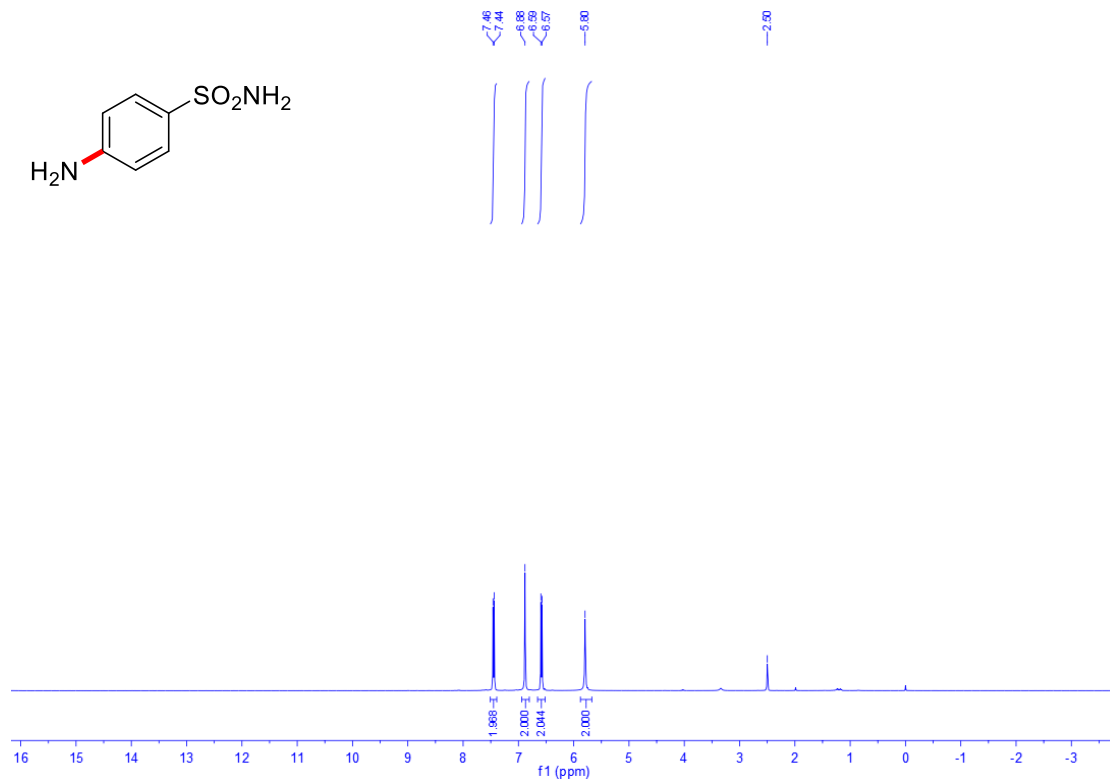

**Figure S40.**  $^1\text{H}$  NMR (400 MHz,  $\text{DMSO}-d_6$ , 20 °C) of **2s**

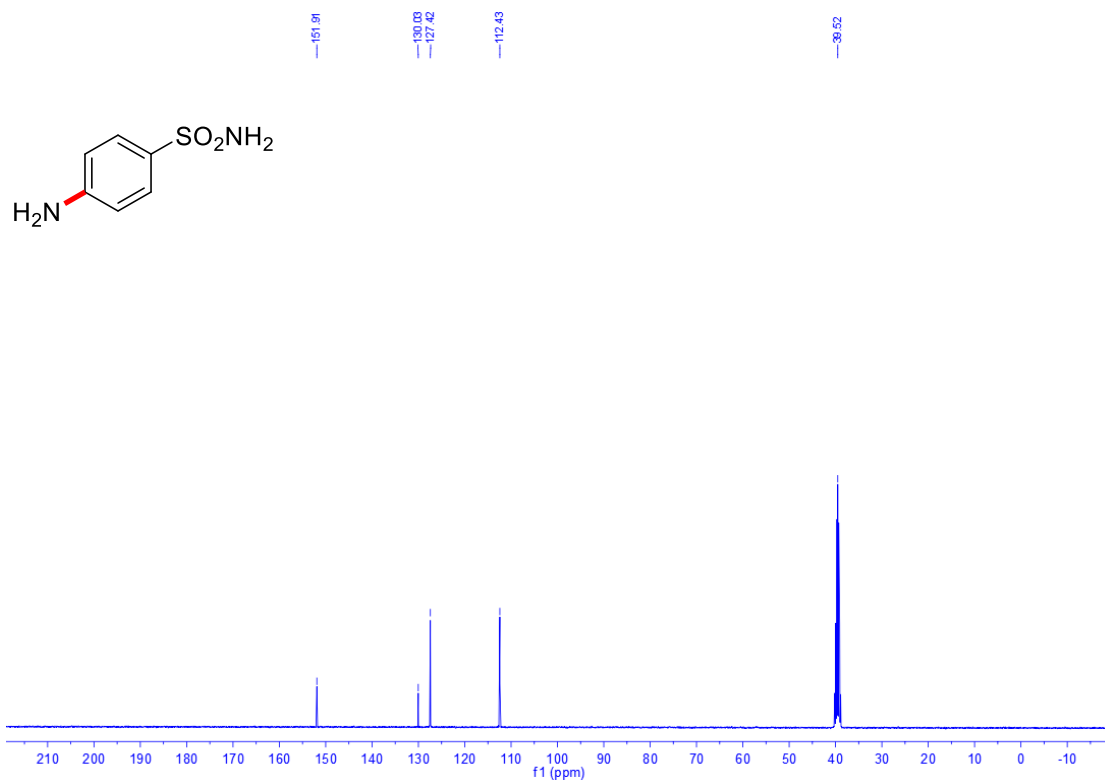

Figure S41.  $^{13}\text{C}\{^1\text{H}\}$  (101 MHz,  $\text{DMSO-}d_6$ , 20 °C) of **2s**

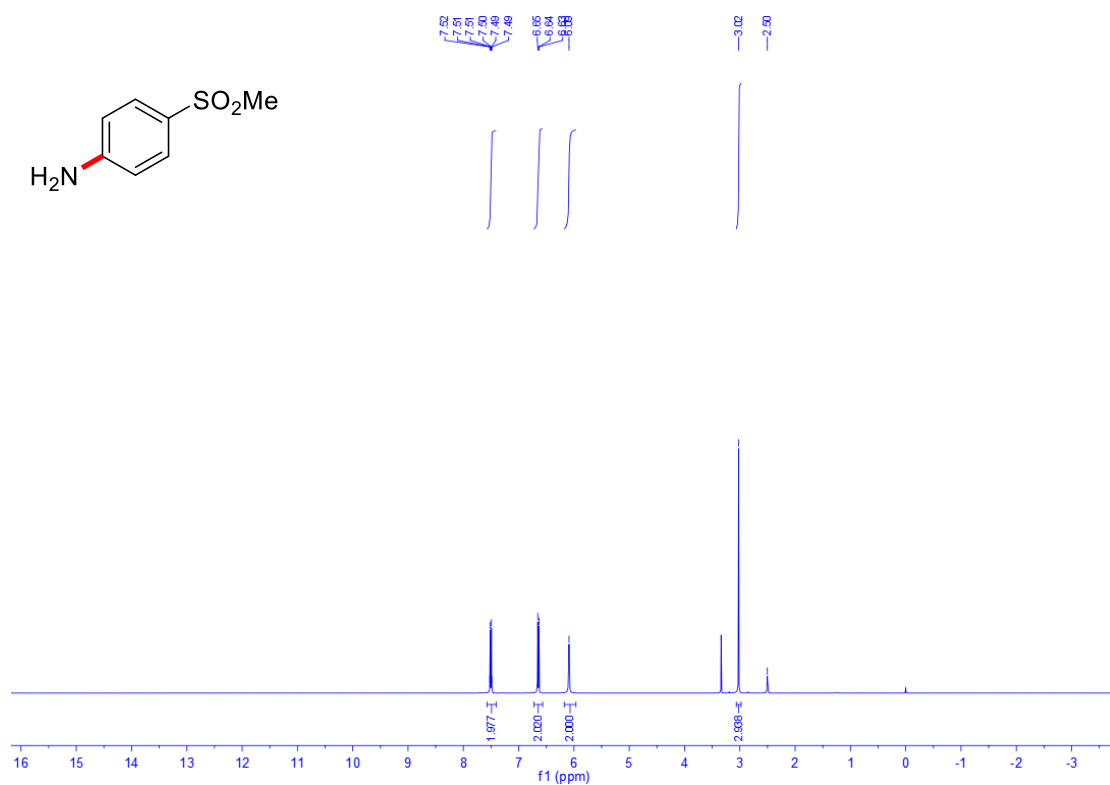

Figure S42.  $^1\text{H}$  NMR (400 MHz,  $\text{DMSO-}d_6$ , 20 °C) of **2t**

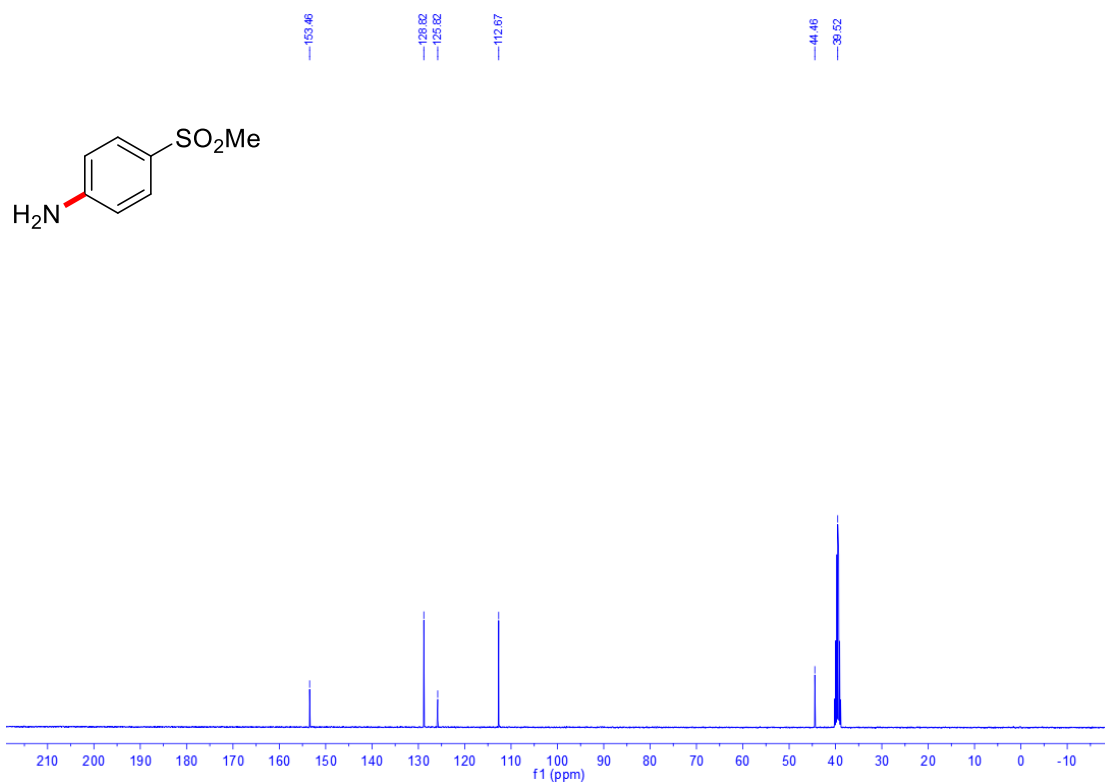

Figure S43.  $^{13}\text{C}\{^1\text{H}\}$  (101 MHz,  $\text{DMSO-}d_6$ , 20 °C) of **2t**

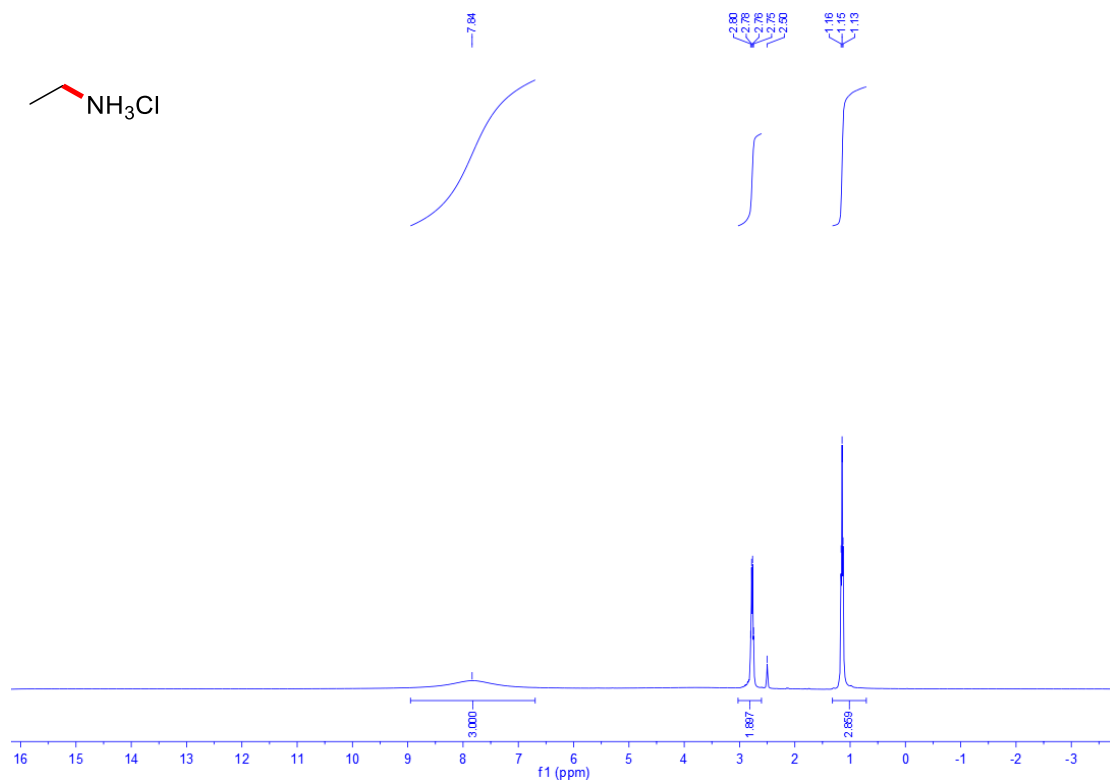

Figure S44.  $^1\text{H}$  NMR (400 MHz,  $\text{DMSO-}d_6$ , 20 °C) of **5a**

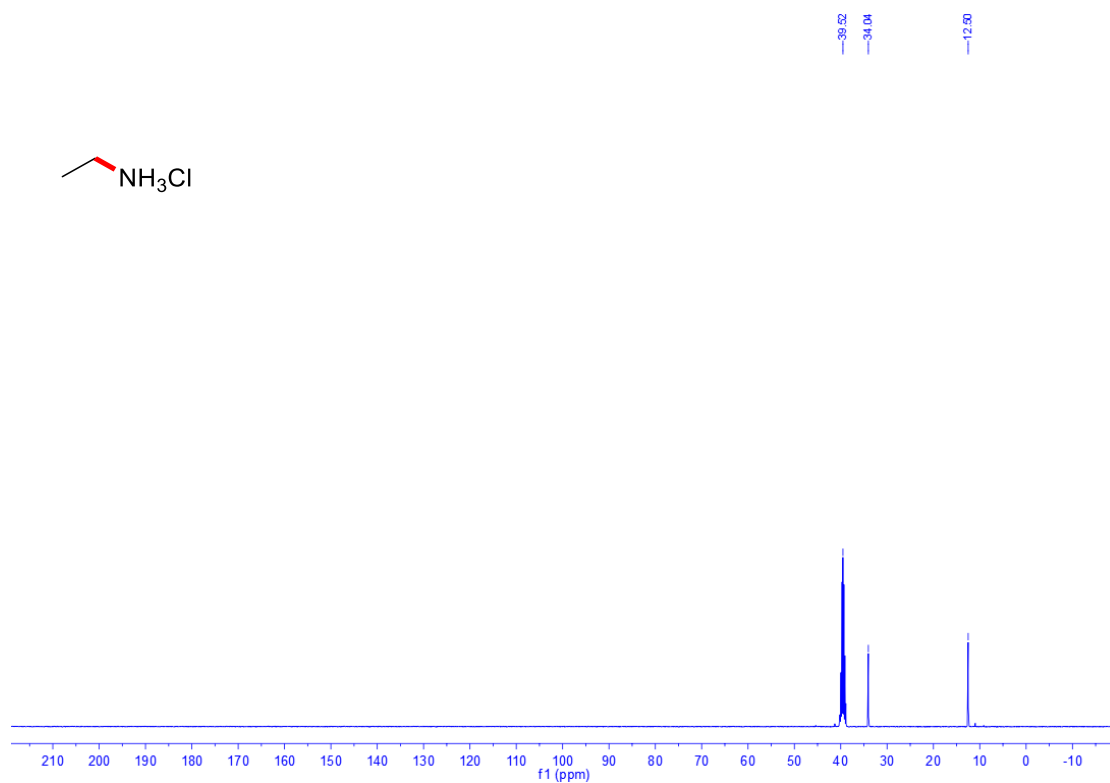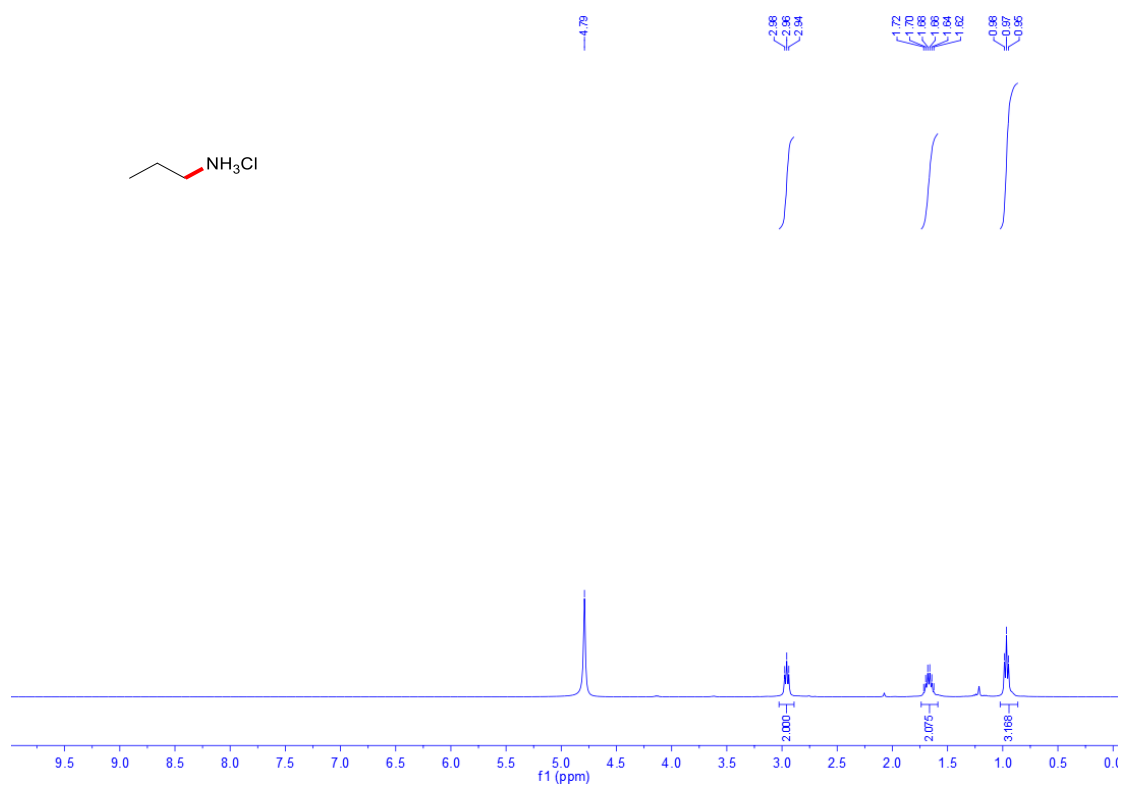



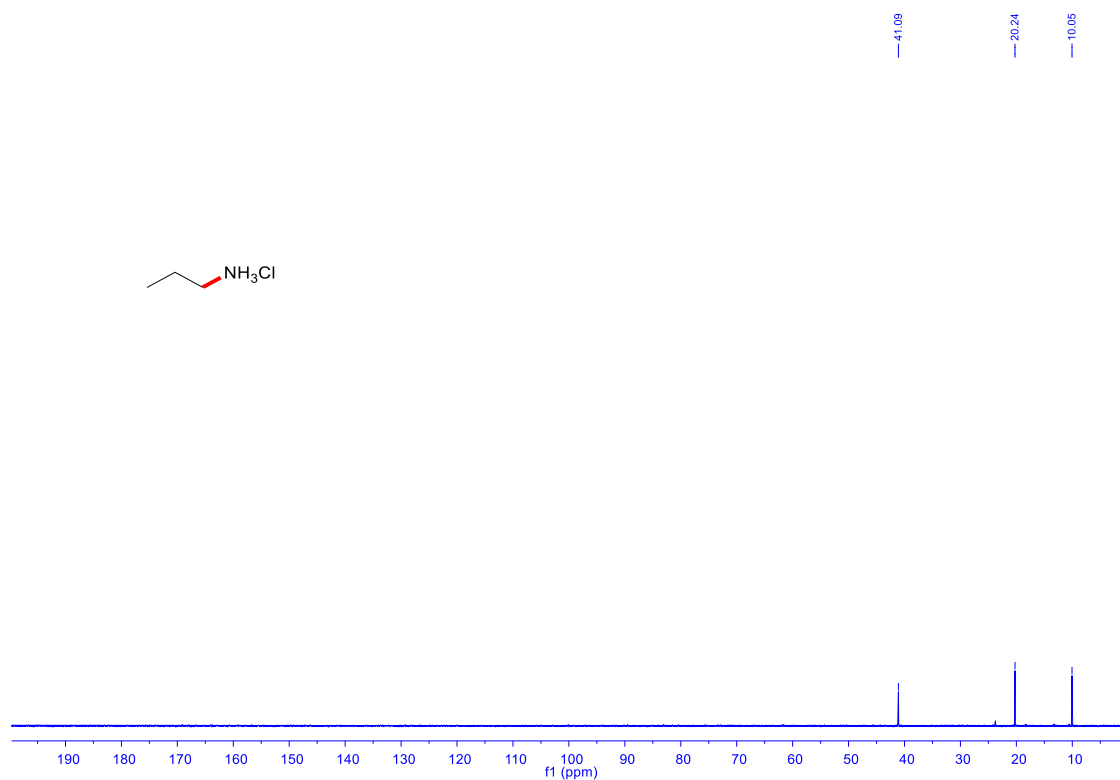

Figure S47.  $^{13}\text{C}\{^1\text{H}\}$  (101 MHz,  $\text{D}_2\text{O}$ , 20 °C) of **5b**

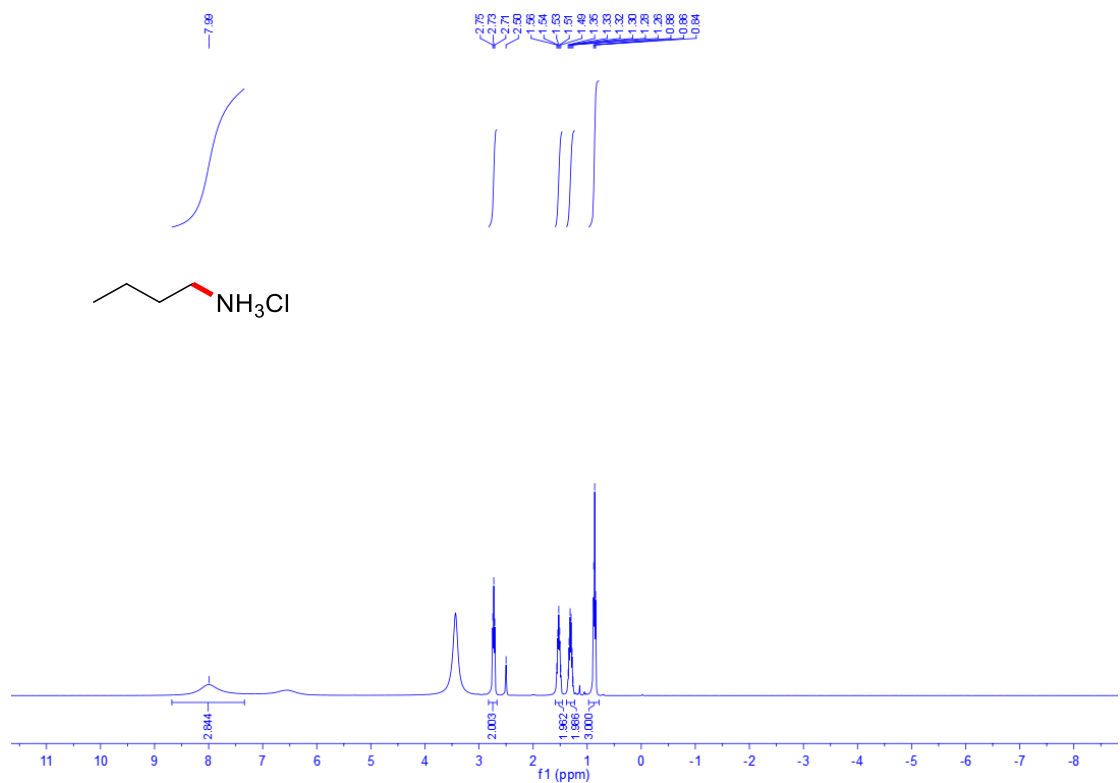

Figure S48.  $^1\text{H}$  NMR (400 MHz,  $\text{DMSO}-d_6$ , 20 °C) of **5c**

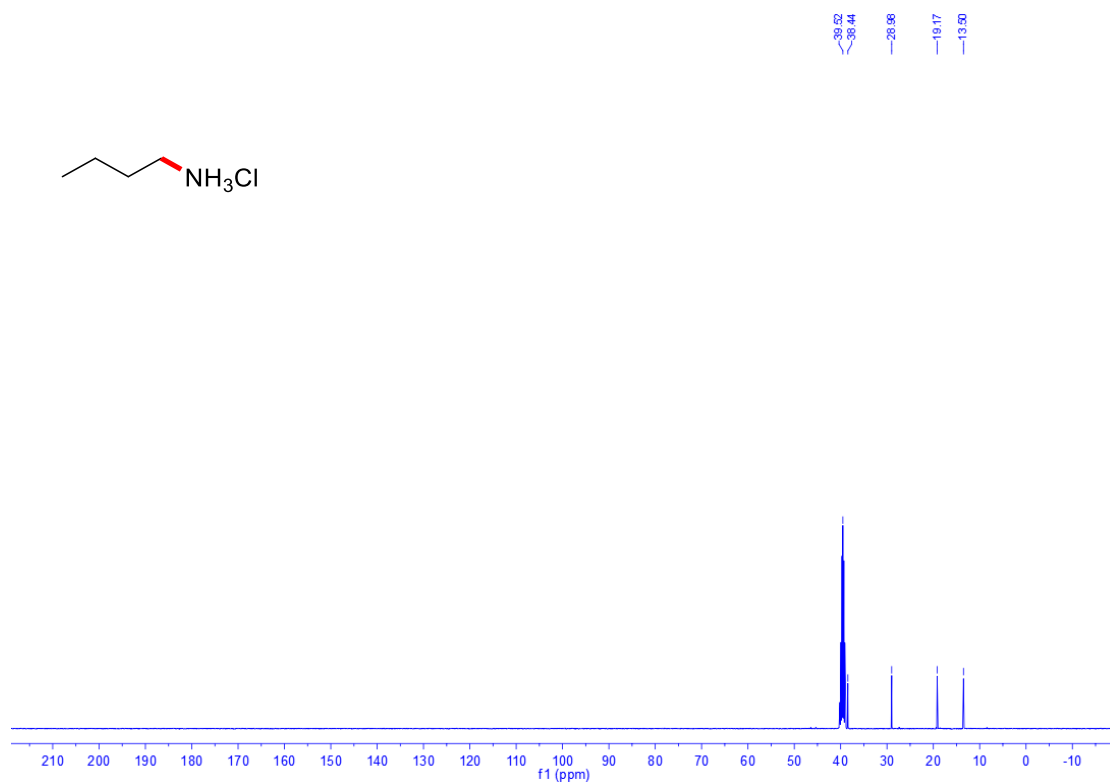

Figure S49.  $^{13}\text{C}\{^1\text{H}\}$  (101 MHz, DMSO- $d_6$ , 20 °C) of 5c

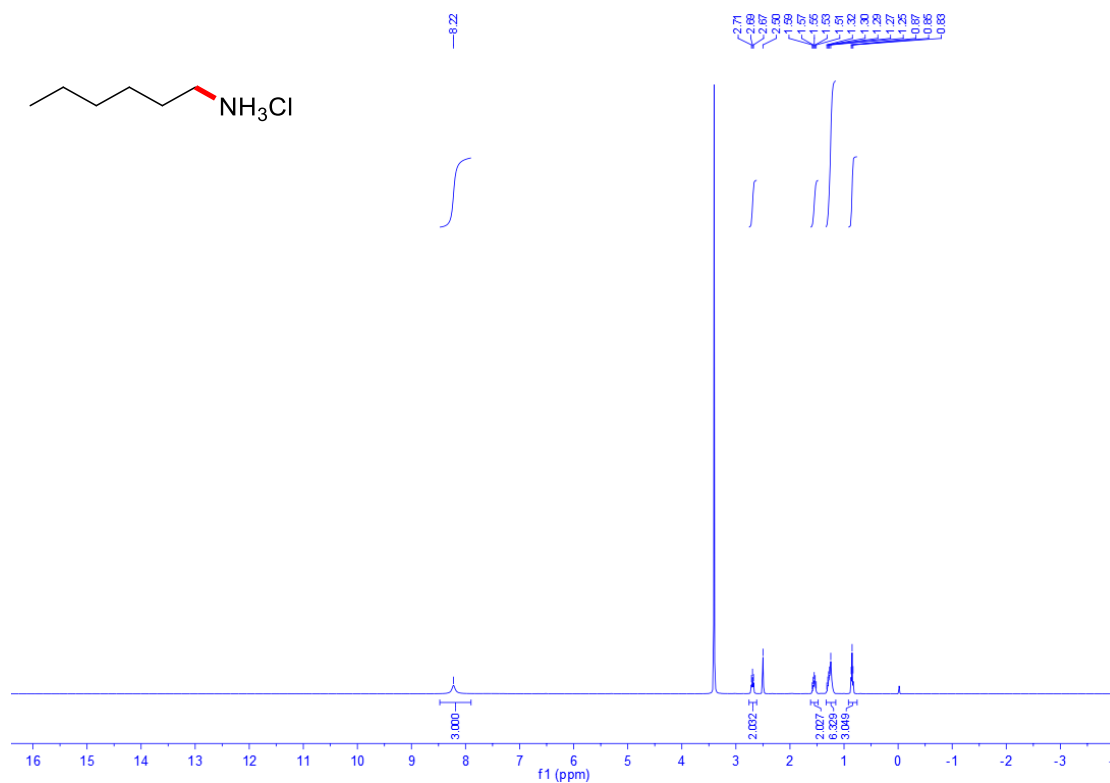

Figure S50.  $^1\text{H}$  NMR (400 MHz, DMSO- $d_6$ , 20 °C) of 5d

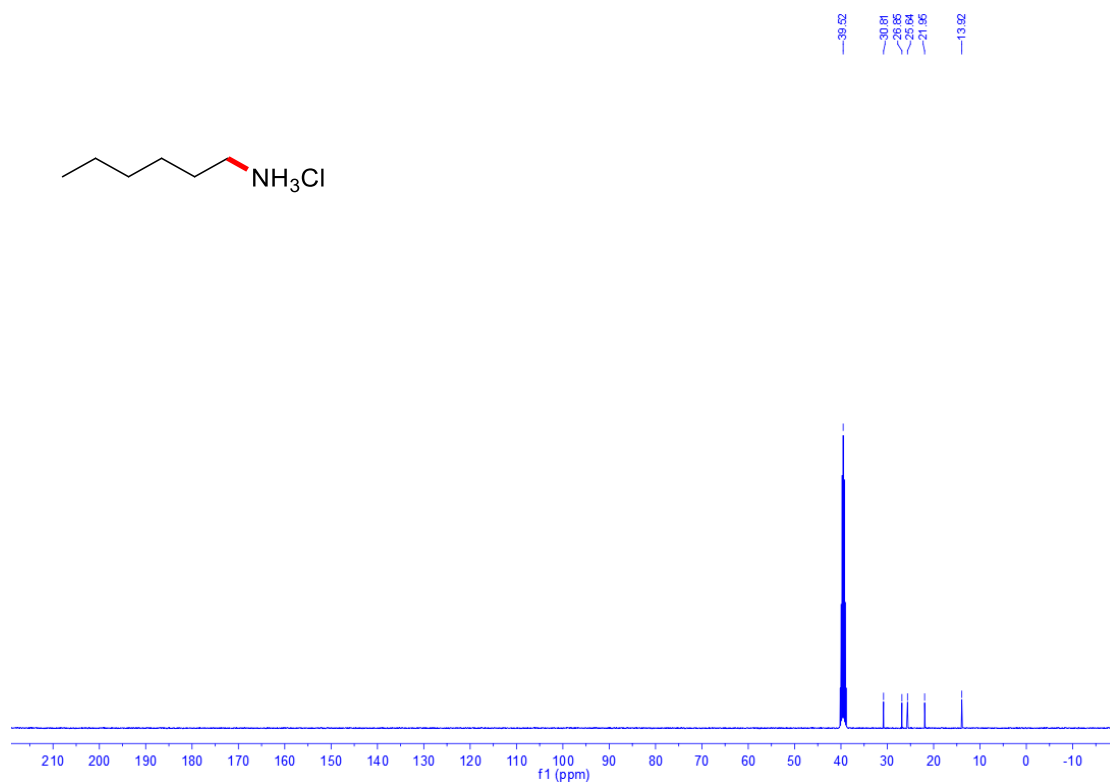

**Figure S51.**  $^{13}\text{C}\{^1\text{H}\}$  (101 MHz, DMSO- $d_6$ , 20 °C) of **5d**

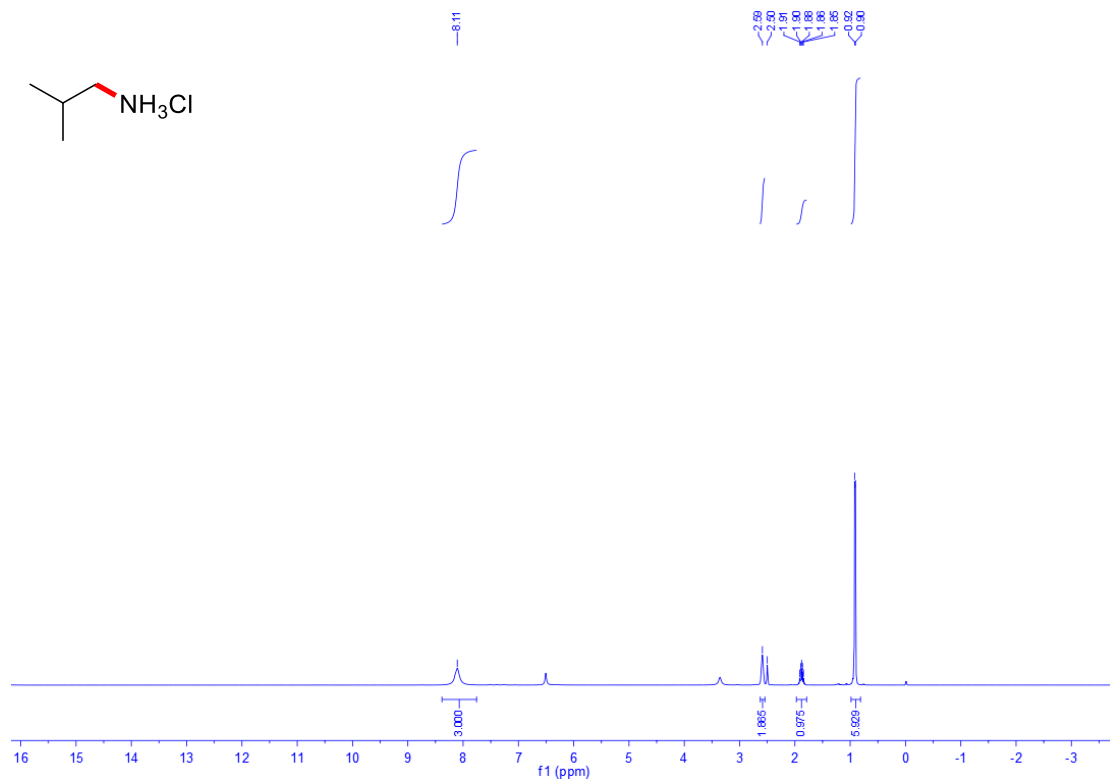

**Figure S52.**  $^1\text{H}$  NMR (400 MHz, DMSO- $d_6$ , 20 °C) of **5e**

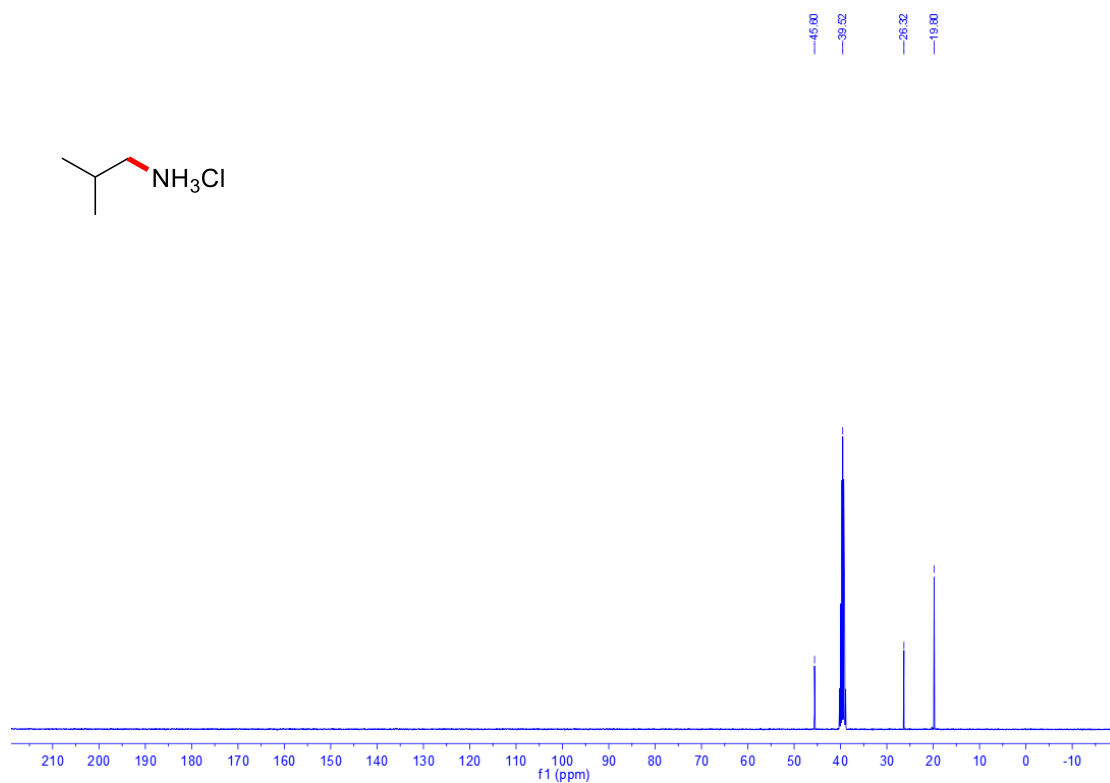

Figure S53.  $^{13}\text{C}\{^1\text{H}\}$  (101 MHz,  $\text{DMSO-}d_6$ , 20 °C) of **5e**

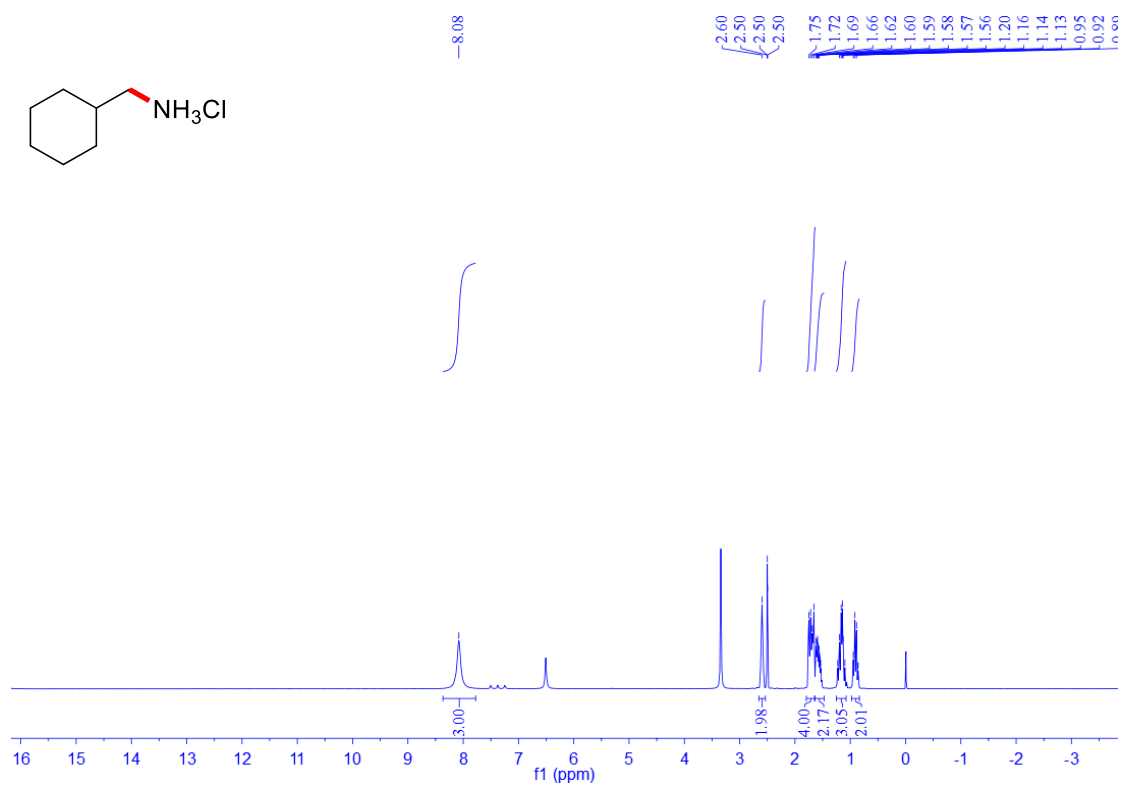

Figure S54.  $^1\text{H}$  NMR (400 MHz,  $\text{DMSO-}d_6$ , 20 °C) of **5f**

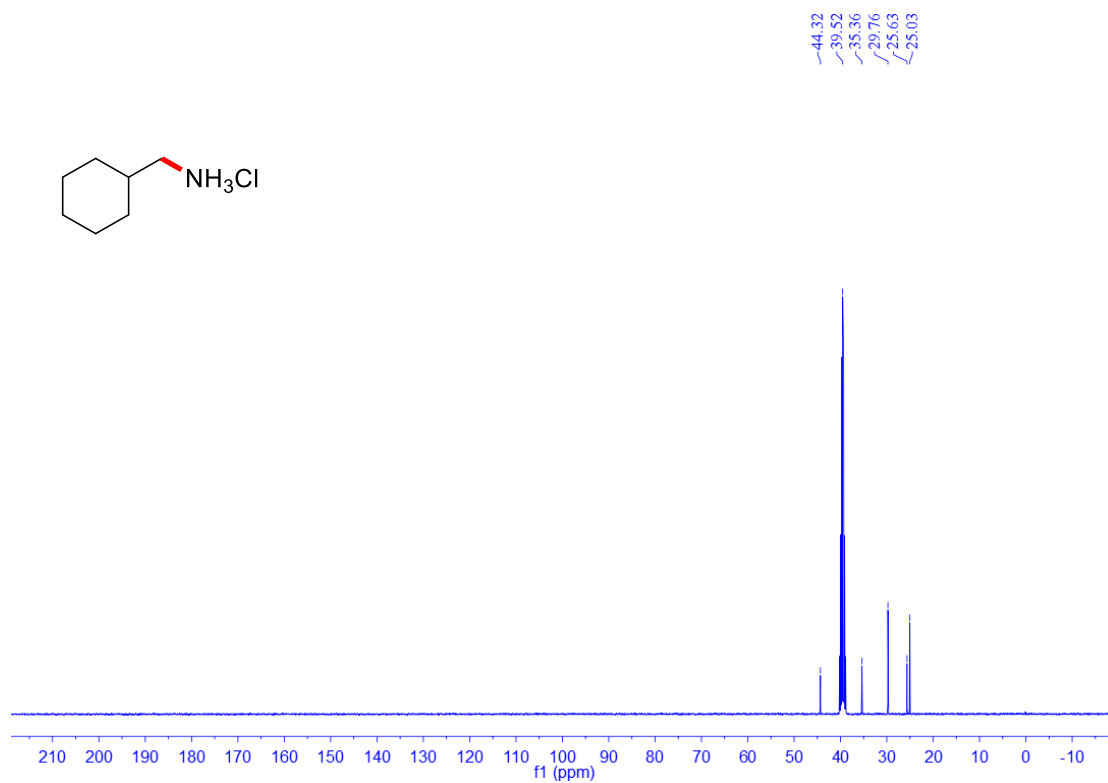

**Figure S55.**  $^{13}\text{C}\{^1\text{H}\}$  (101 MHz,  $\text{DMSO-}d_6$ , 20 °C) of **5f**

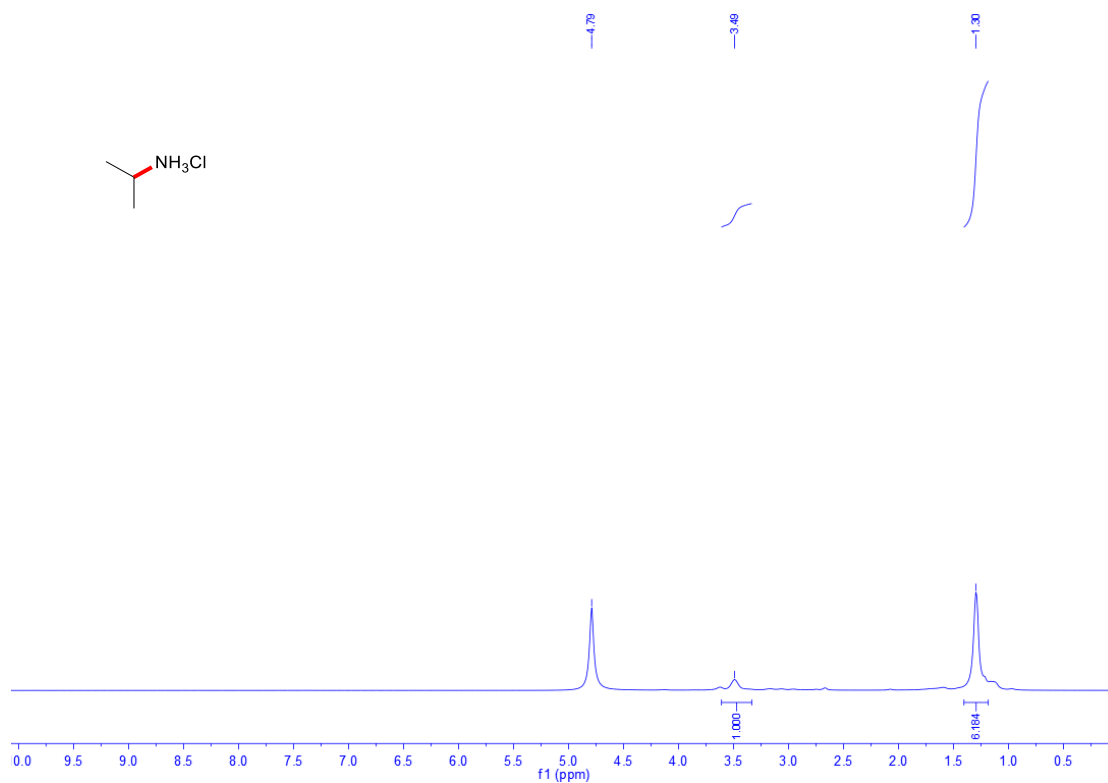

**Figure S56.**  $^1\text{H}$  NMR (400 MHz,  $\text{D}_2\text{O}$ , 20 °C) of **5g**

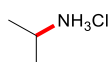

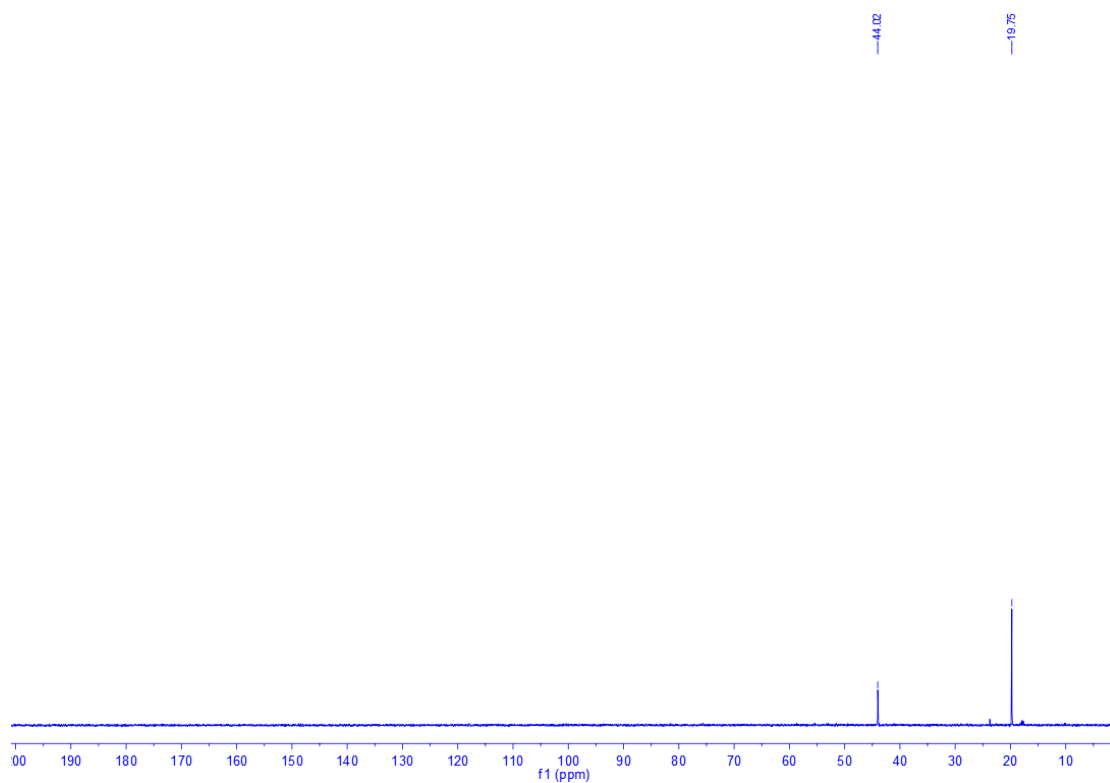

**Figure S57.**  $^{13}\text{C}\{^1\text{H}\}$  (101 MHz,  $\text{D}_2\text{O}$ , 20 °C) of **5g**

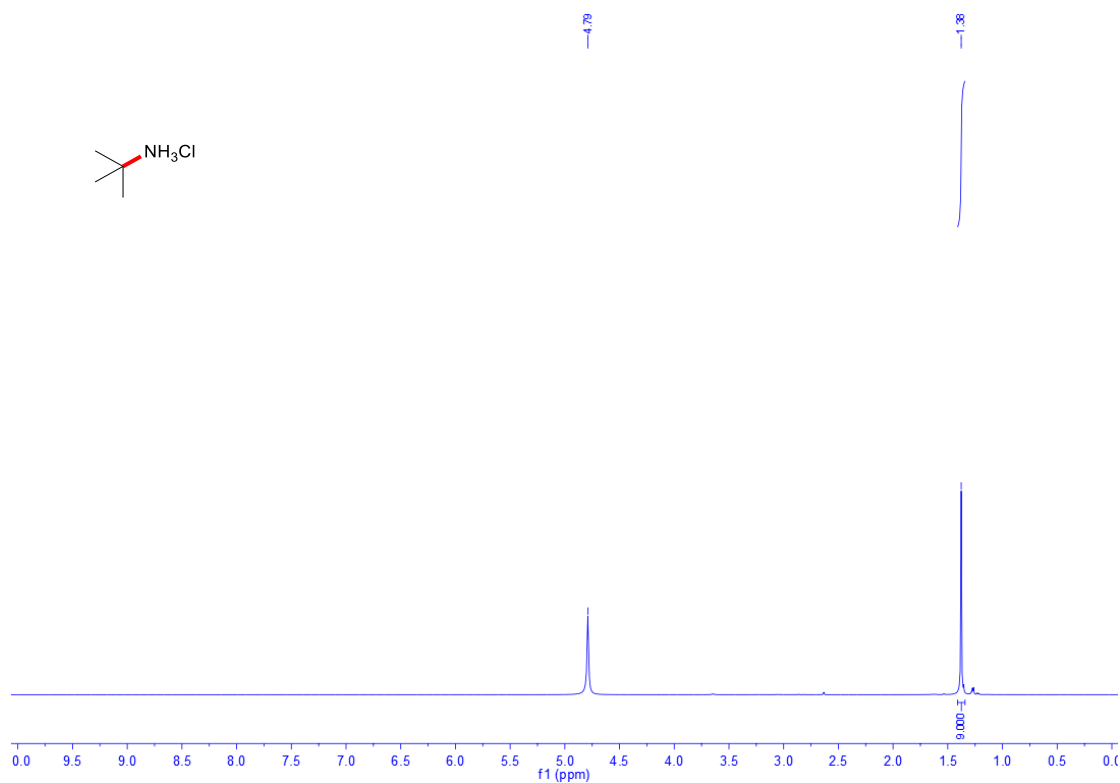

**Figure S58.**  $^1\text{H}$  NMR (400 MHz,  $\text{D}_2\text{O}$ , 20 °C) of **5h**

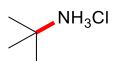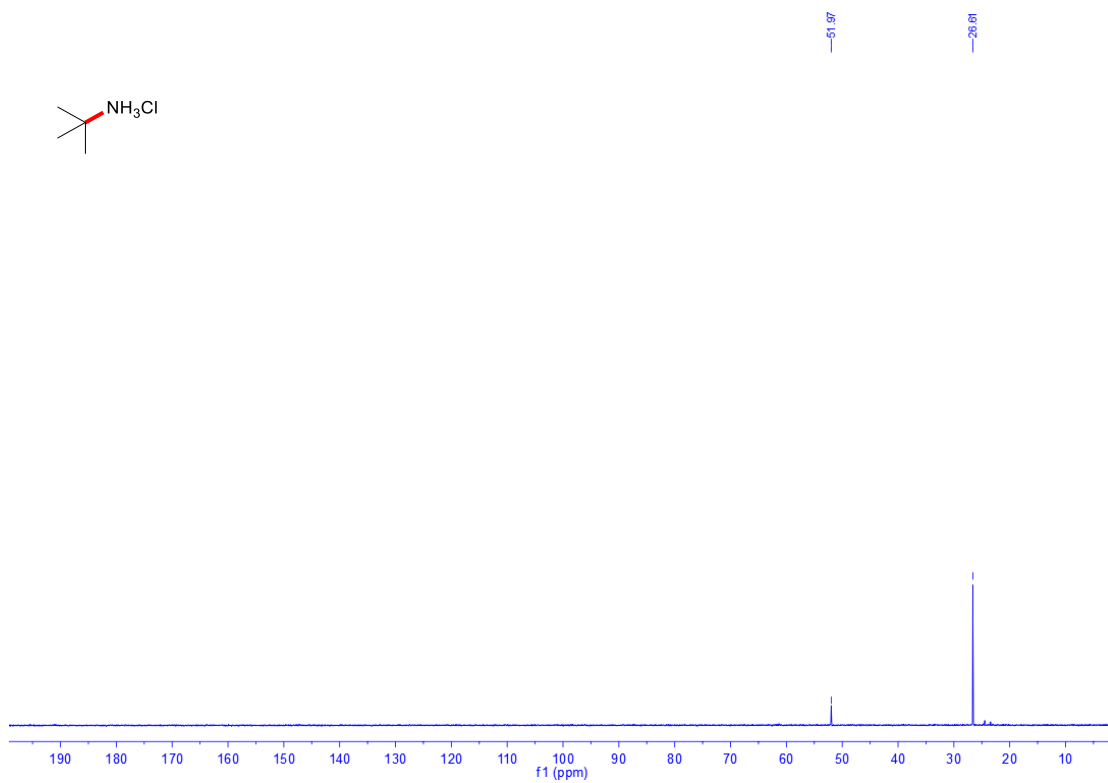

**Figure S59.**  $^{13}\text{C}\{^1\text{H}\}$  (101 MHz,  $\text{D}_2\text{O}$ , 20 °C) of **5h**

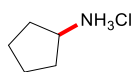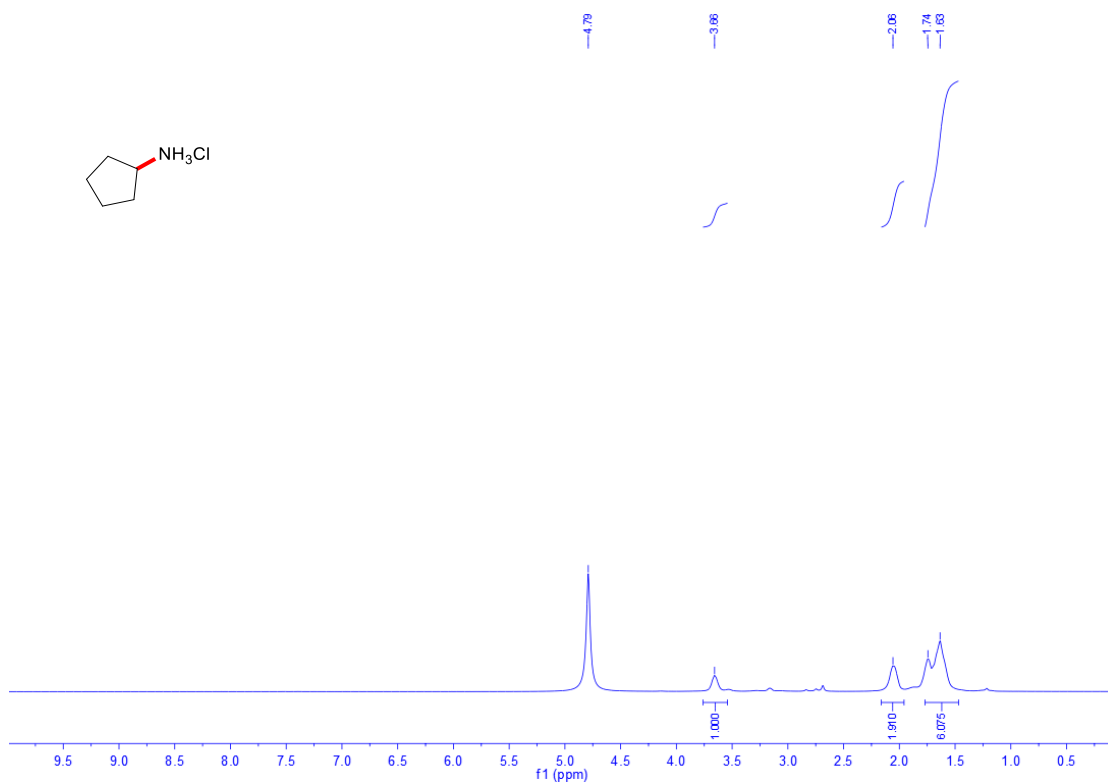

**Figure S60.**  $^1\text{H}$  NMR (400 MHz,  $\text{D}_2\text{O}$ , 20 °C) of **5i**

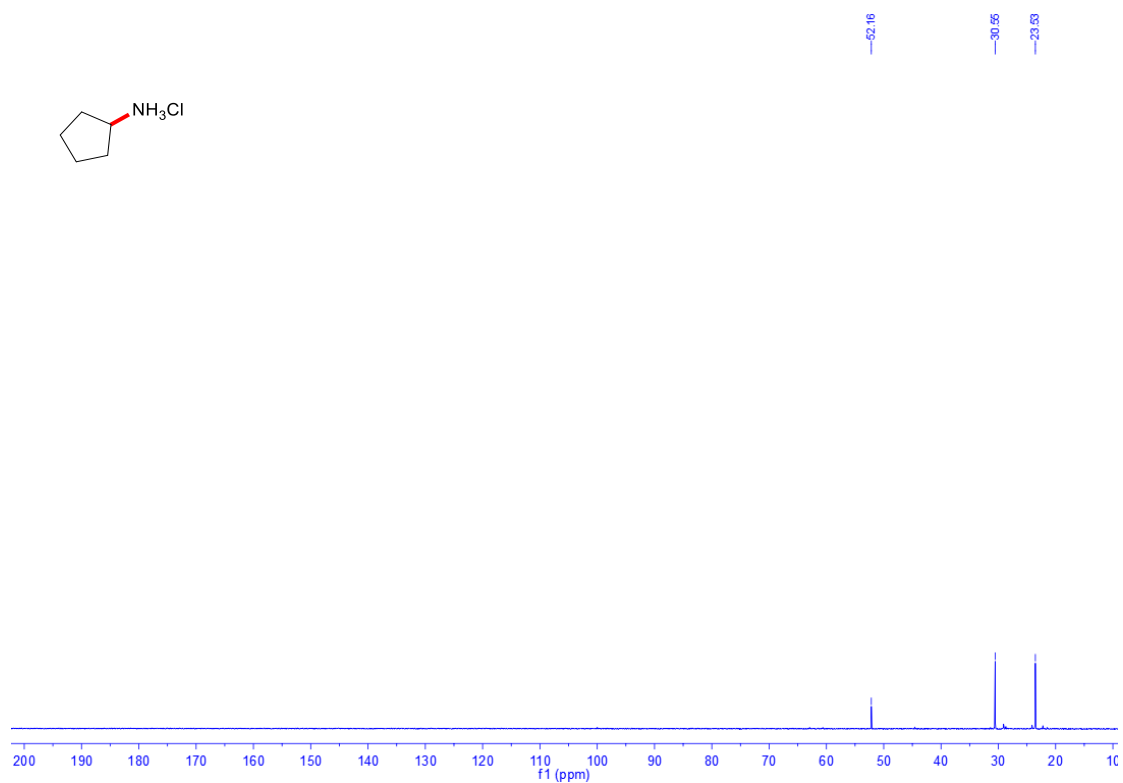

Figure S61.  $^{13}\text{C}\{^1\text{H}\}$  (101 MHz,  $\text{D}_2\text{O}$ , 20 °C) of **5i**

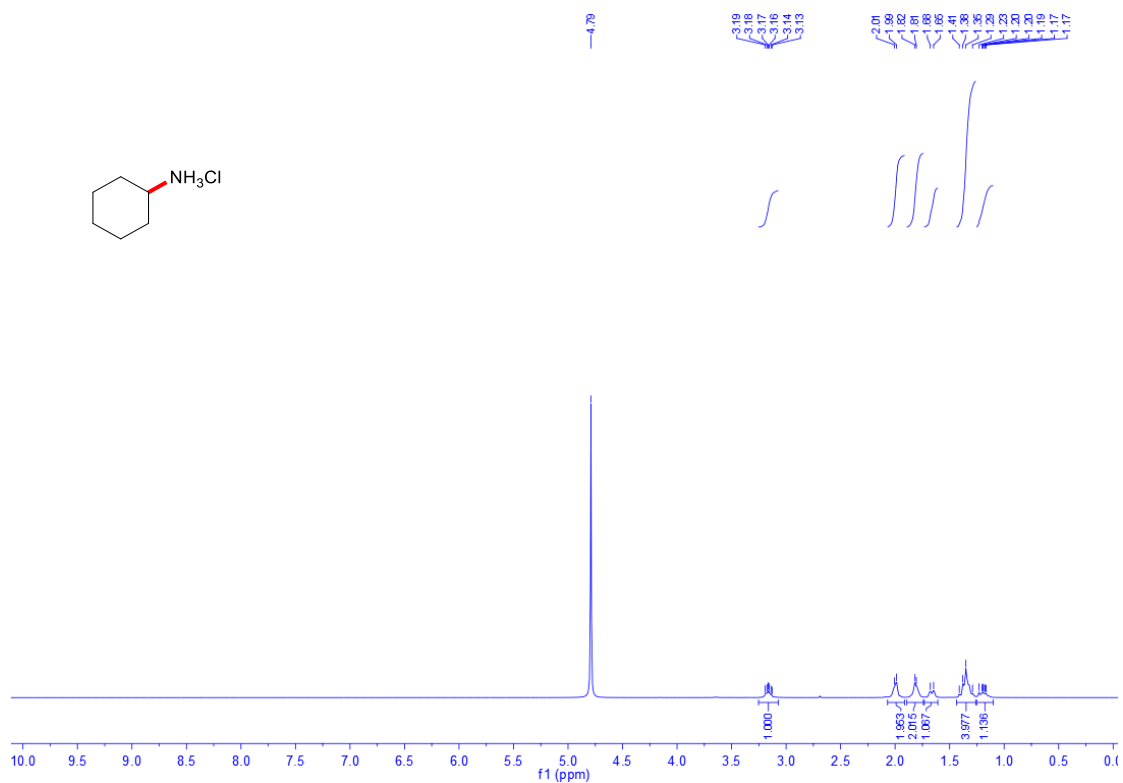

Figure S62.  $^1\text{H}$  NMR (400 MHz,  $\text{D}_2\text{O}$ , 20 °C) of **5j**



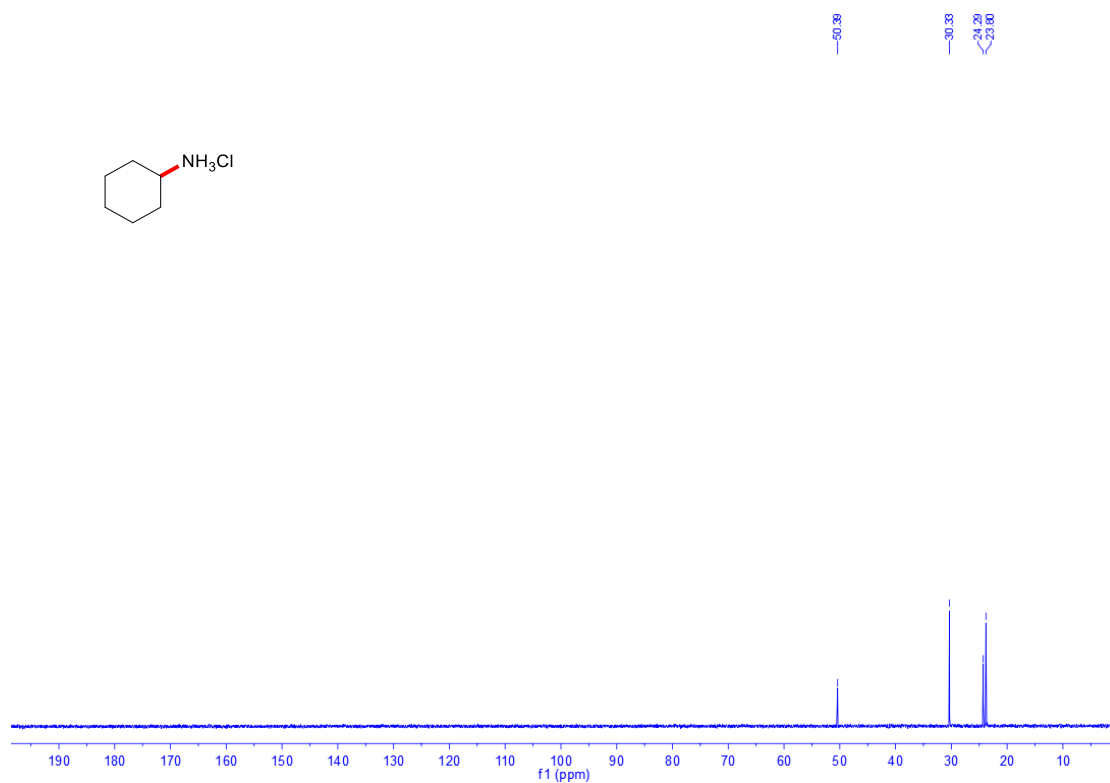

Figure S63.  $^{13}\text{C}\{^1\text{H}\}$  (101 MHz,  $\text{D}_2\text{O}$ , 20 °C) of **5j**

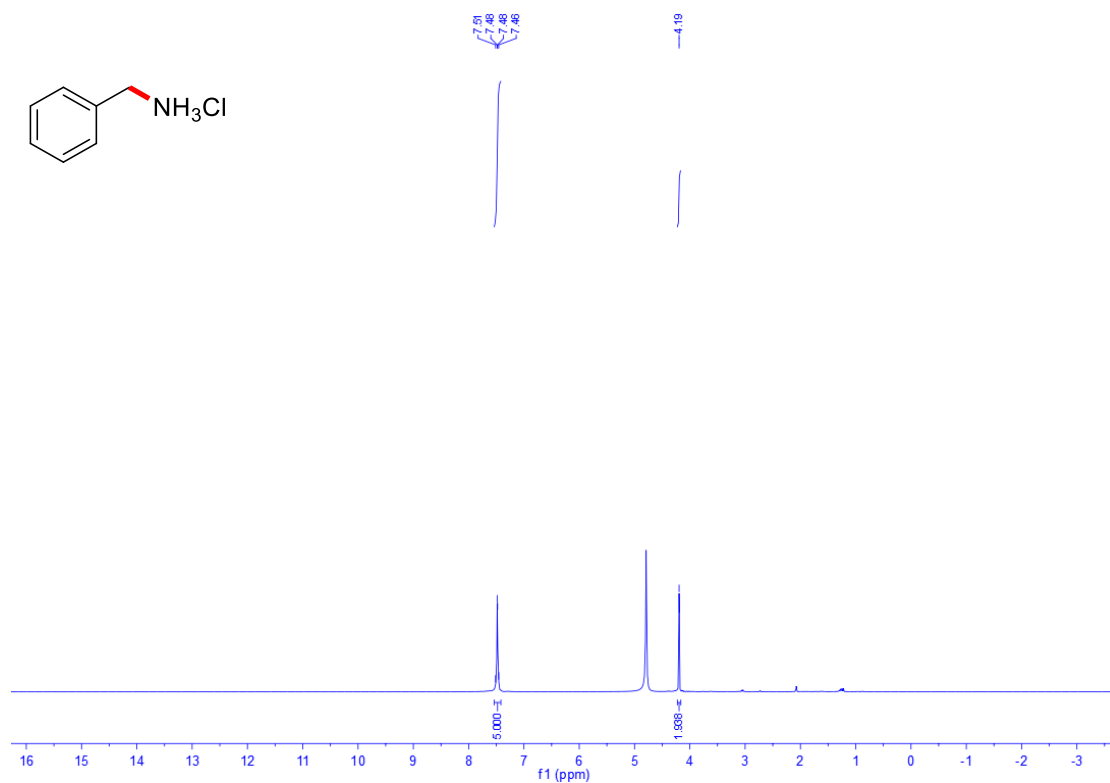

Figure S64.  $^1\text{H}$  NMR (400 MHz,  $\text{D}_2\text{O}$ , 20 °C) of **5k**

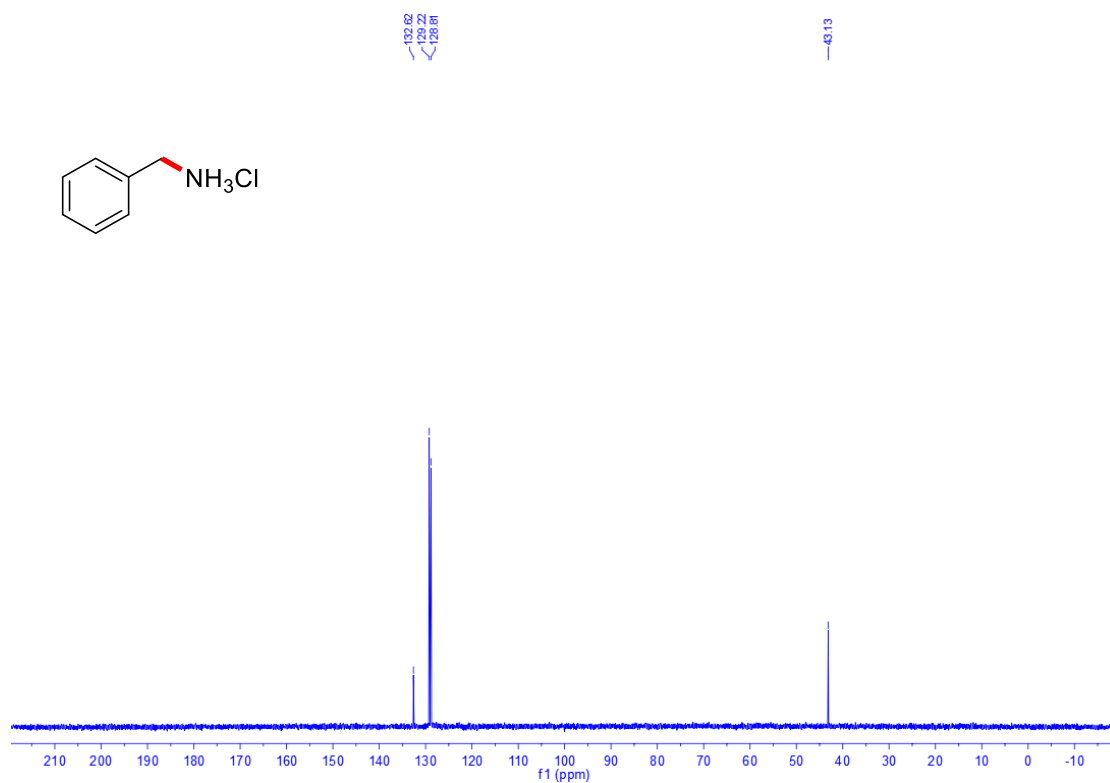

Figure S65.  $^{13}\text{C}\{^1\text{H}\}$  (101 MHz,  $\text{D}_2\text{O}$ , 20 °C) of **5k**

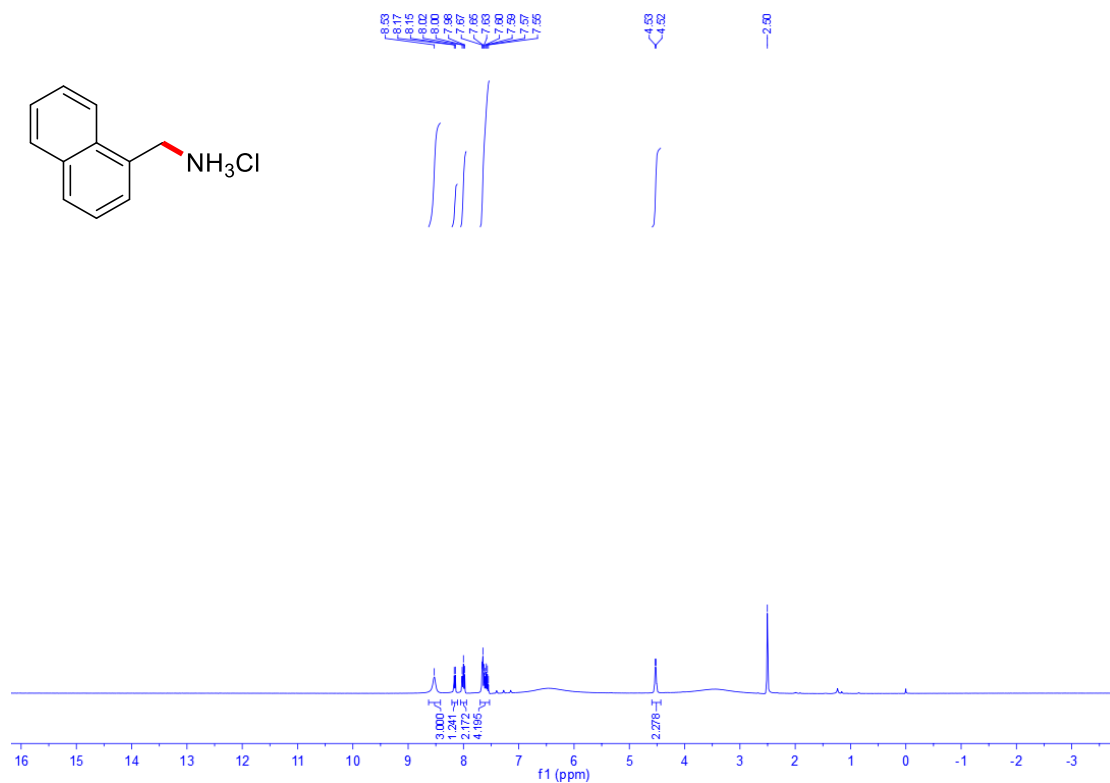

Figure S66.  $^1\text{H}$  NMR (400 MHz,  $\text{DMSO-}d_6$ , 20 °C) of **5l**

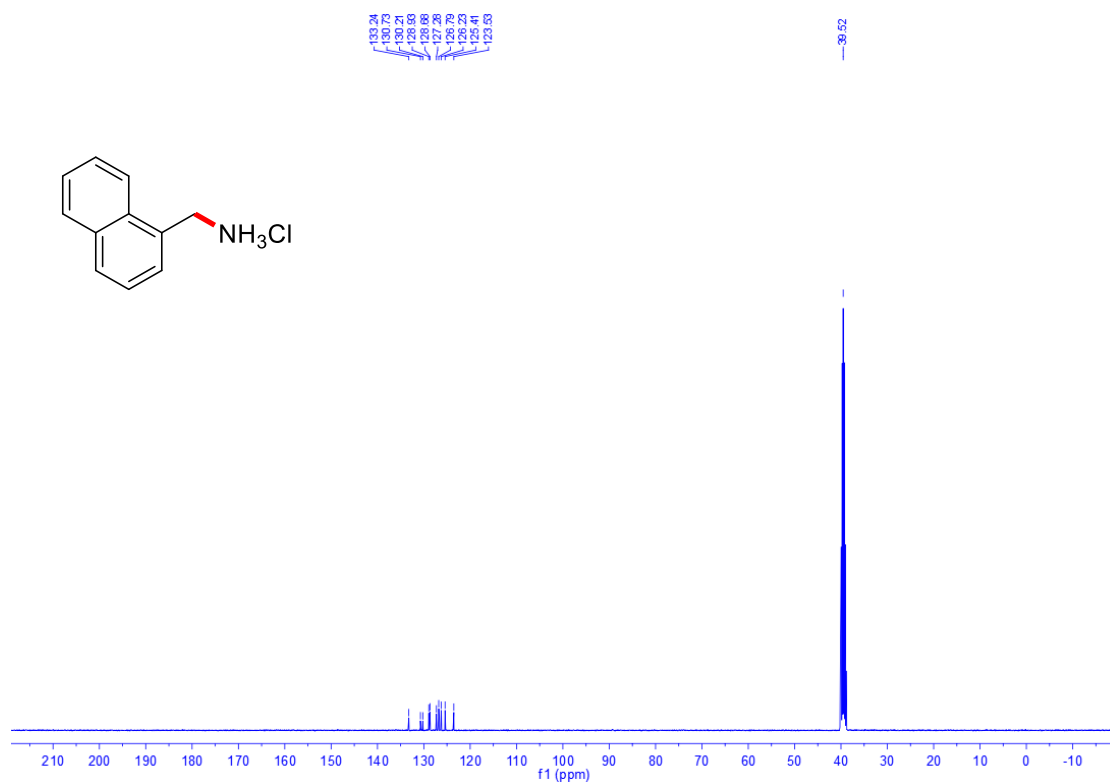

Figure S67.  $^{13}\text{C}\{^1\text{H}\}$  (101 MHz,  $\text{DMSO-}d_6$ , 20 °C) of **5l**

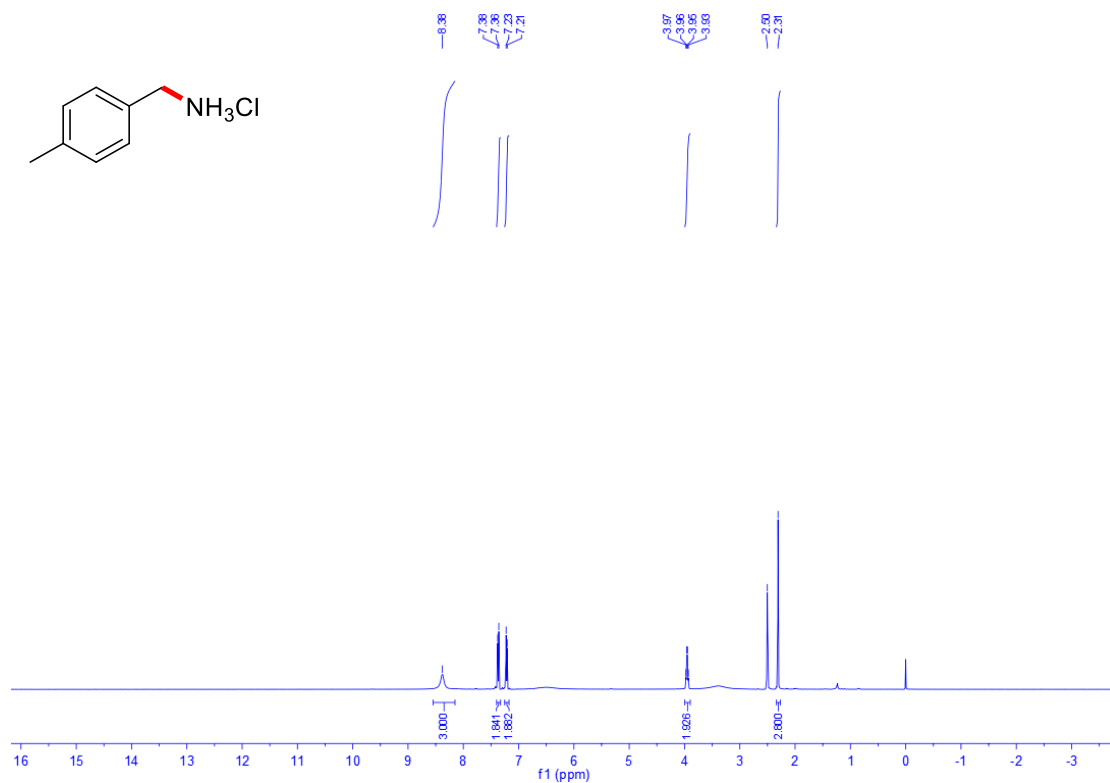

Figure S68.  $^1\text{H}$  NMR (400 MHz,  $\text{DMSO-}d_6$ , 20 °C) of **5m**

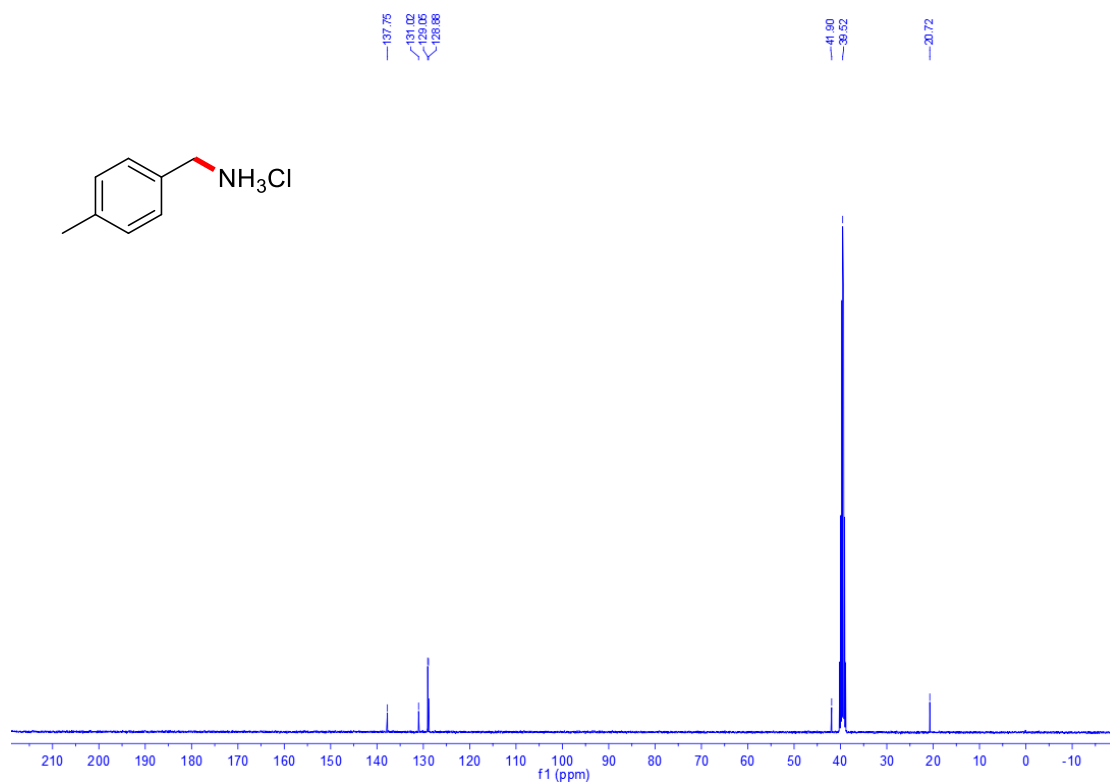

Figure S69.  $^{13}\text{C}\{^1\text{H}\}$  (101 MHz, DMSO- $d_6$ , 20 °C) of 5m

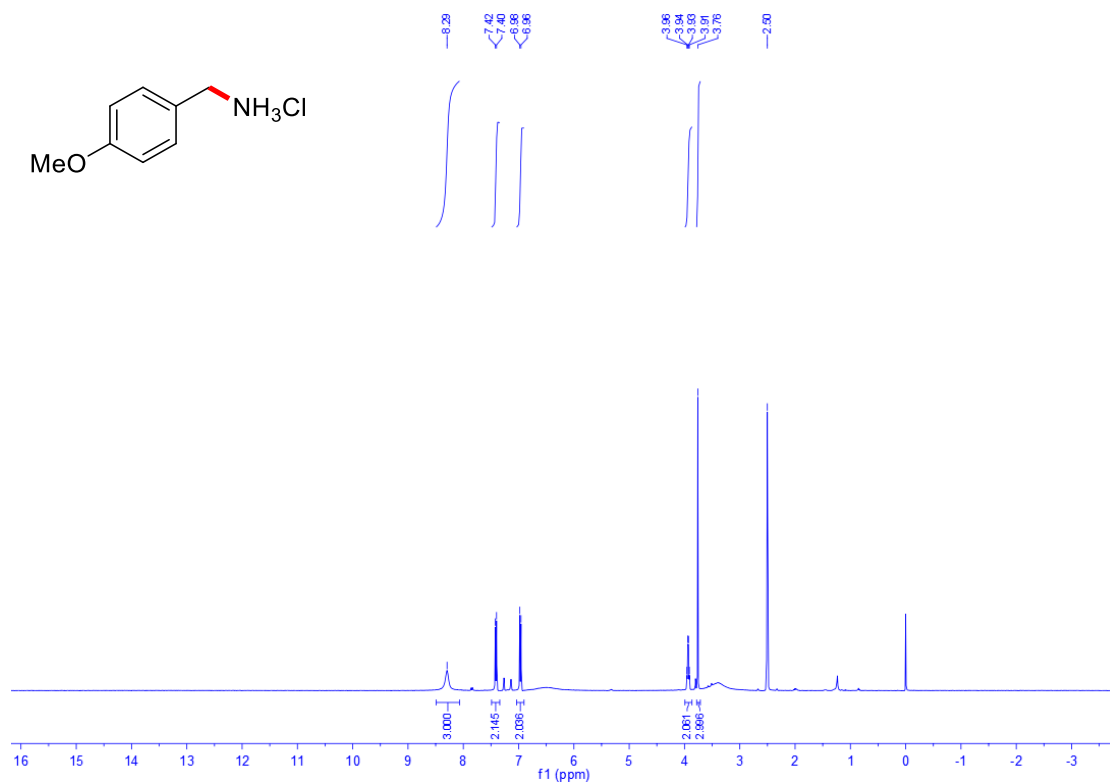

Figure S70.  $^1\text{H}$  NMR (400 MHz, DMSO- $d_6$ , 20 °C) of 5n

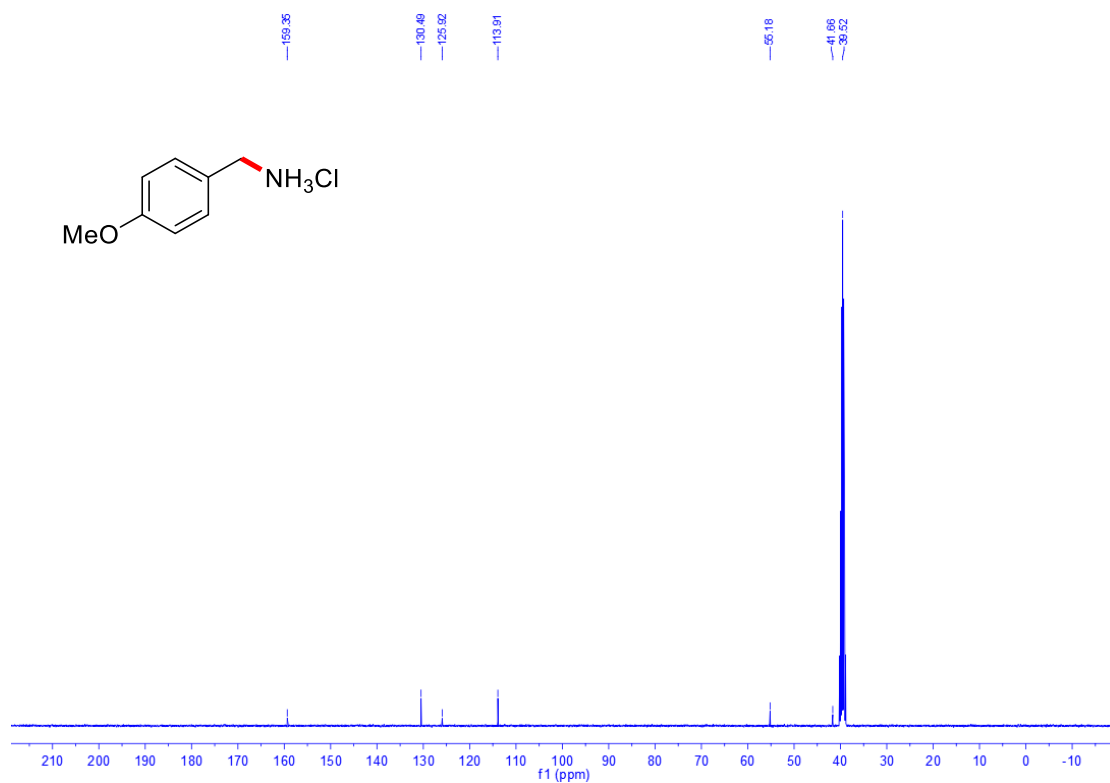

Figure S71.  $^{13}\text{C}\{^1\text{H}\}$  (101 MHz, DMSO- $d_6$ , 20 °C) of 5n

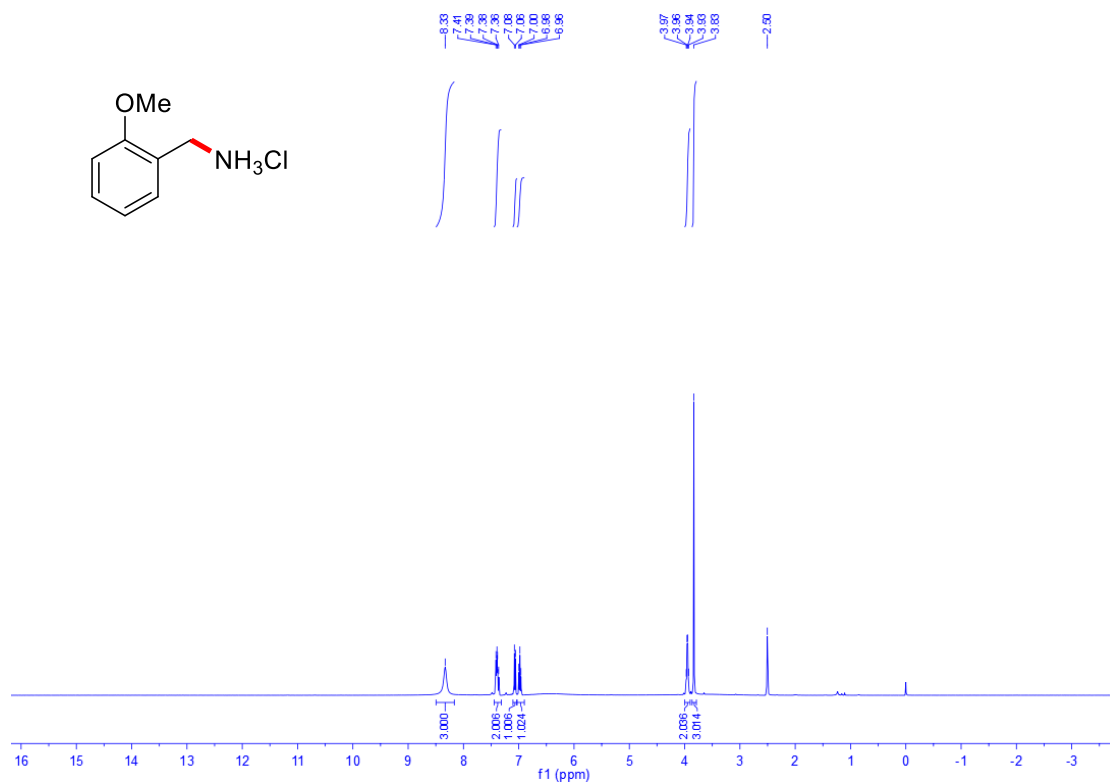

Figure S72.  $^1\text{H}$  NMR (400 MHz, DMSO- $d_6$ , 20 °C) of 5o

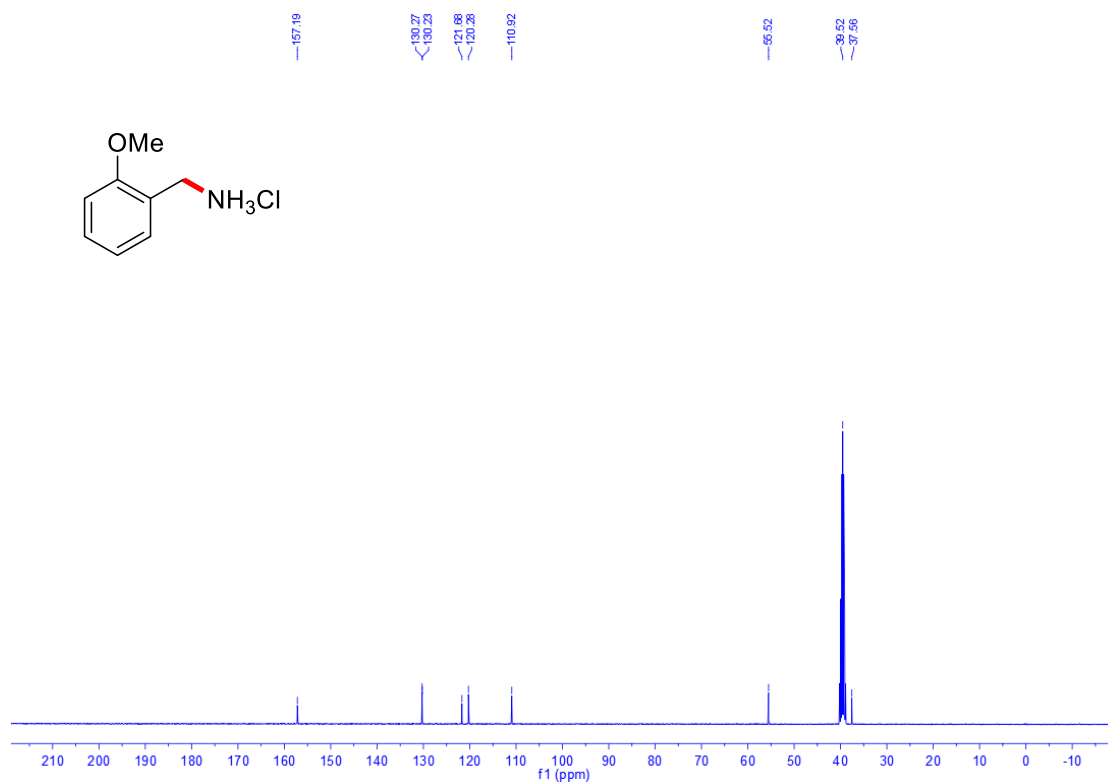

Figure S73. <sup>13</sup>C{<sup>1</sup>H} (101 MHz, DMSO-*d*<sub>6</sub>, 20 °C) of **5o**

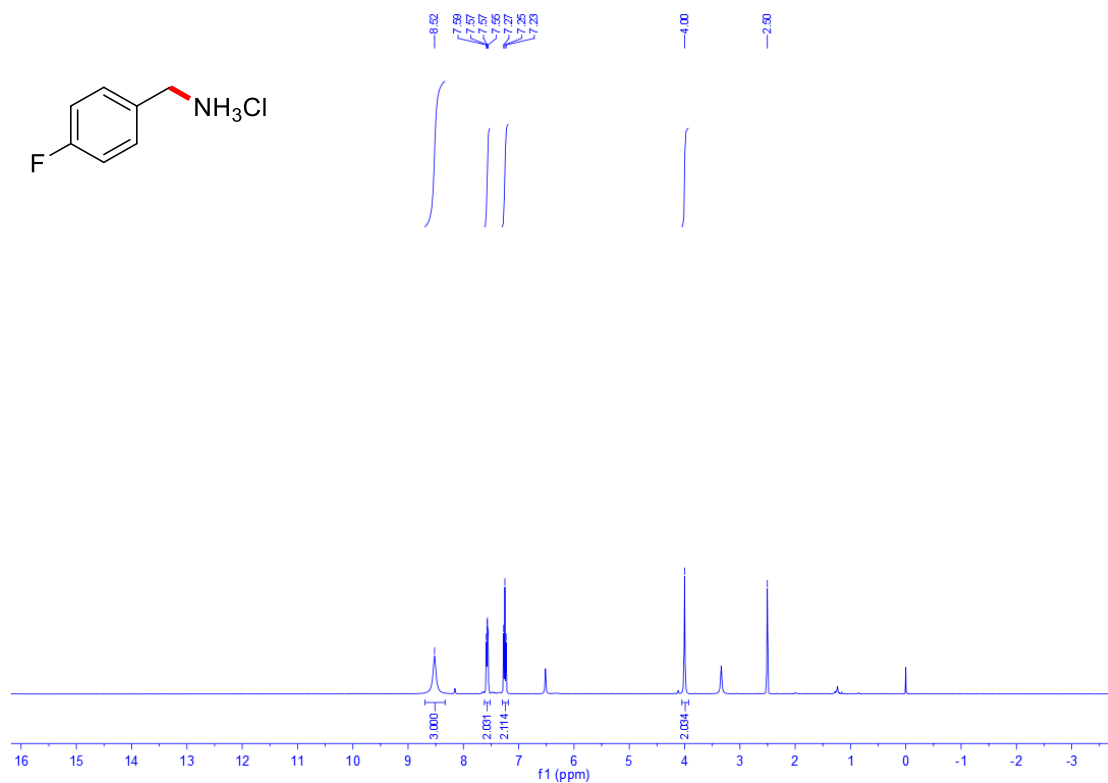

Figure S74. <sup>1</sup>H NMR (400 MHz, DMSO-*d*<sub>6</sub>, 20 °C) of **5p**

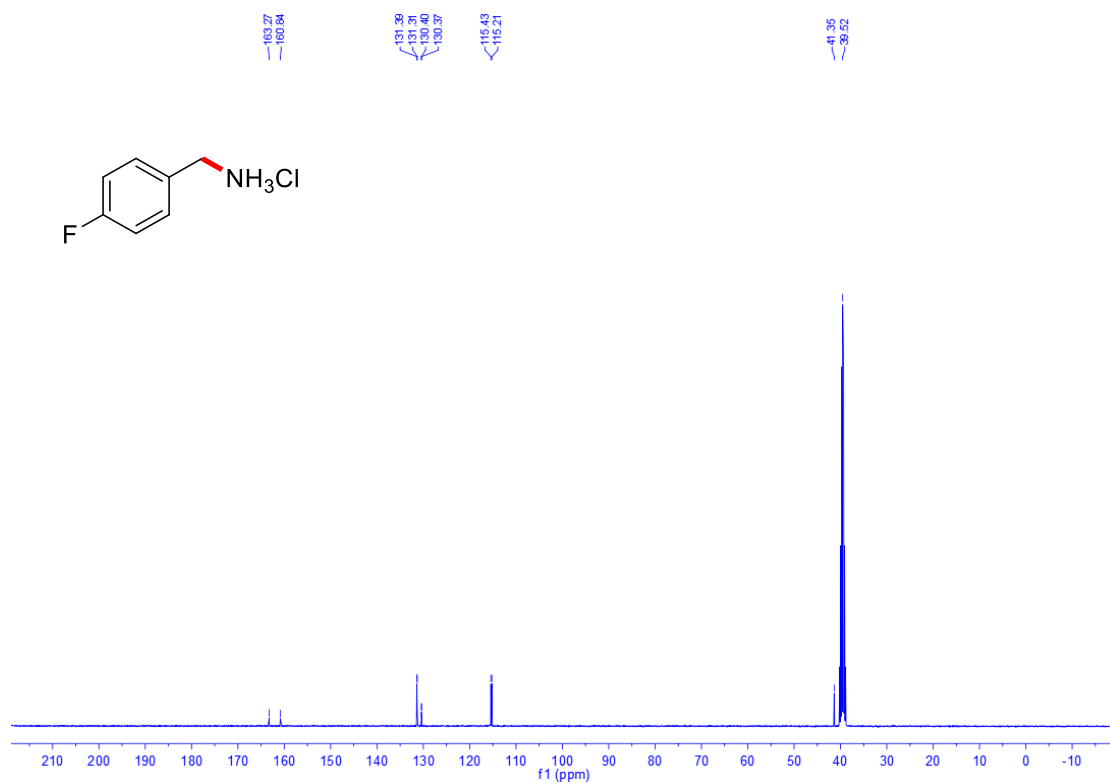

Figure S75. <sup>13</sup>C{<sup>1</sup>H} (101 MHz, DMSO-*d*<sub>6</sub>, 20 °C) of **5p**

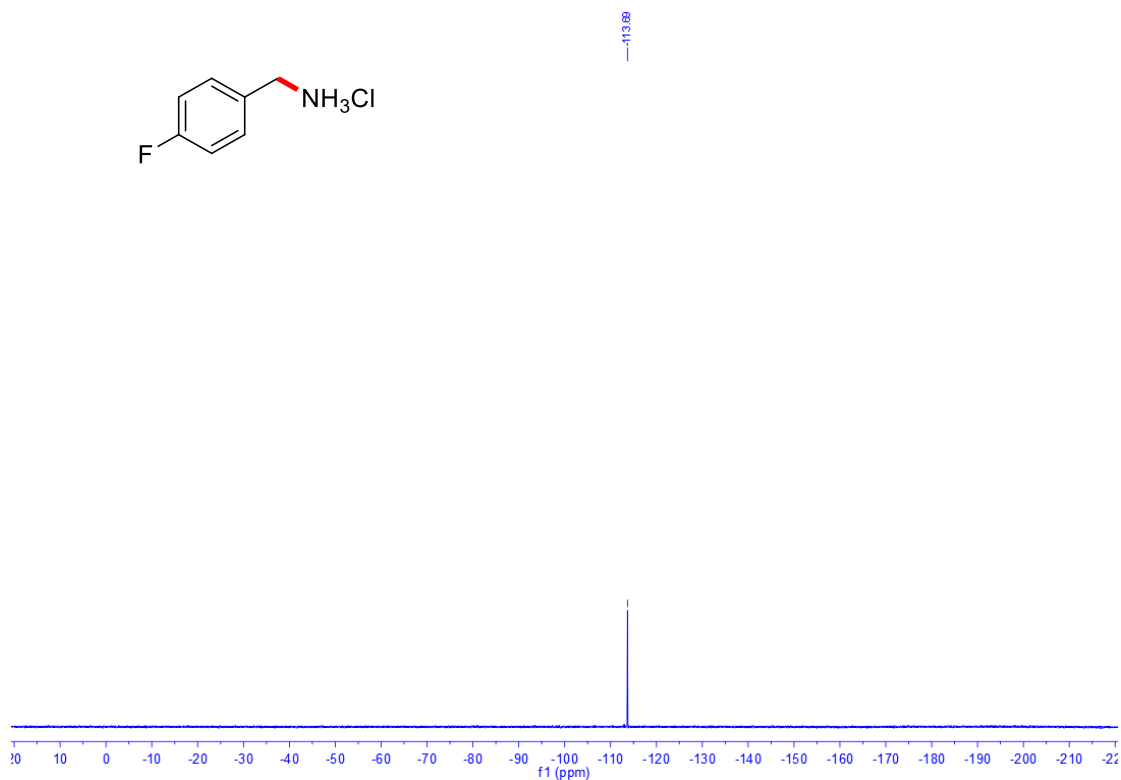

Figure S76. <sup>19</sup>F NMR (377 MHz, DMSO-*d*<sub>6</sub>, 20 °C) of **5p**

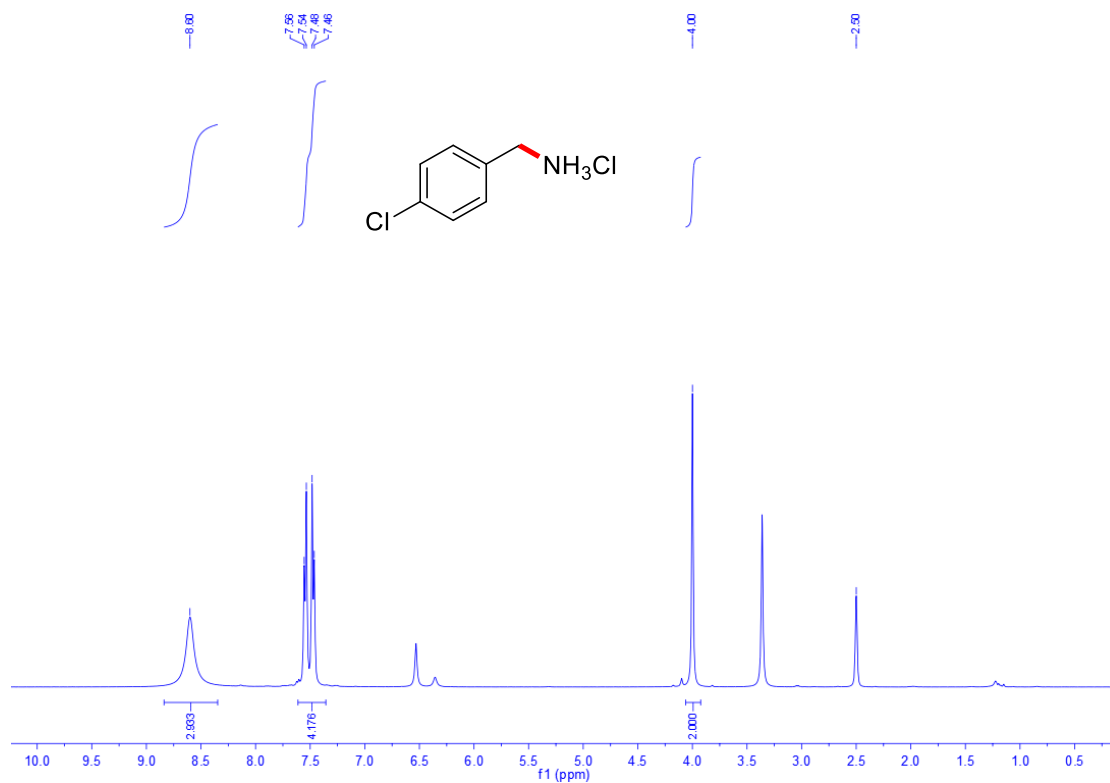

**Figure S77.**  $^1\text{H NMR}$  (400 MHz,  $\text{DMSO-}d_6$ , 20 °C) of **5q**

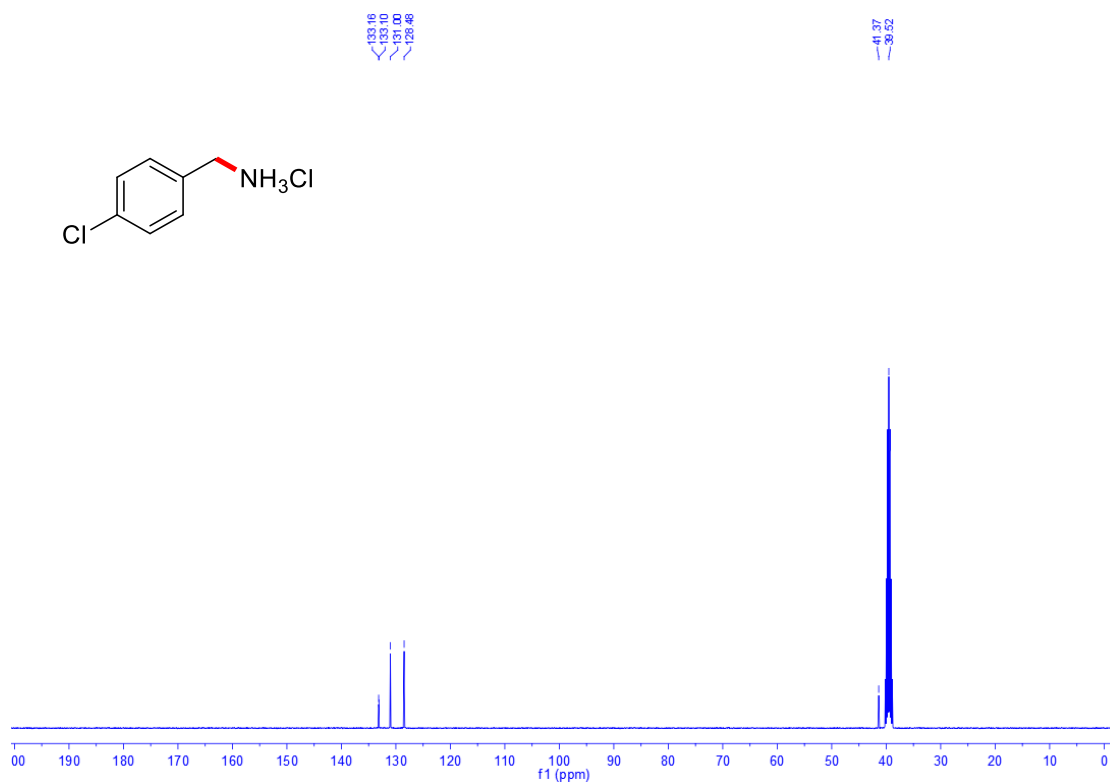

**Figure S78.**  $^{13}\text{C}\{^1\text{H}\}$  (101 MHz,  $\text{DMSO-}d_6$ , 20 °C) of **5q**



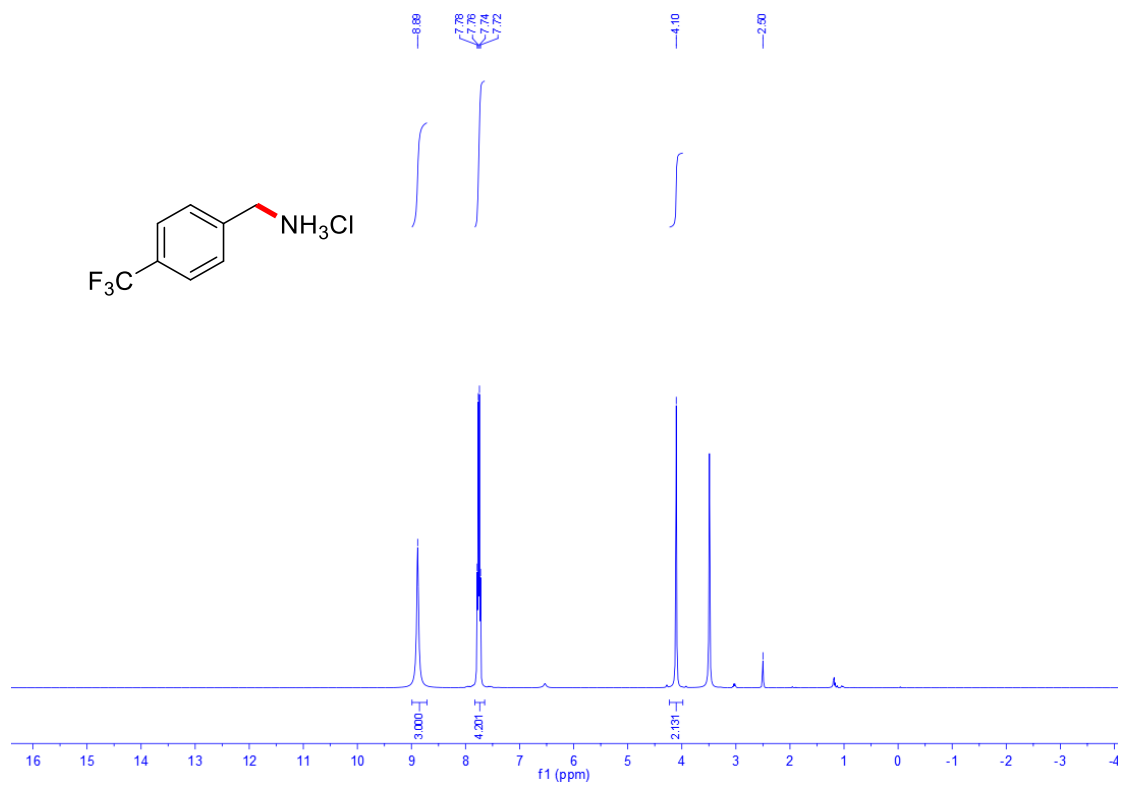

Figure S79.  $^1\text{H NMR}$  (400 MHz,  $\text{DMSO-}d_6$ , 20 °C) of 5r

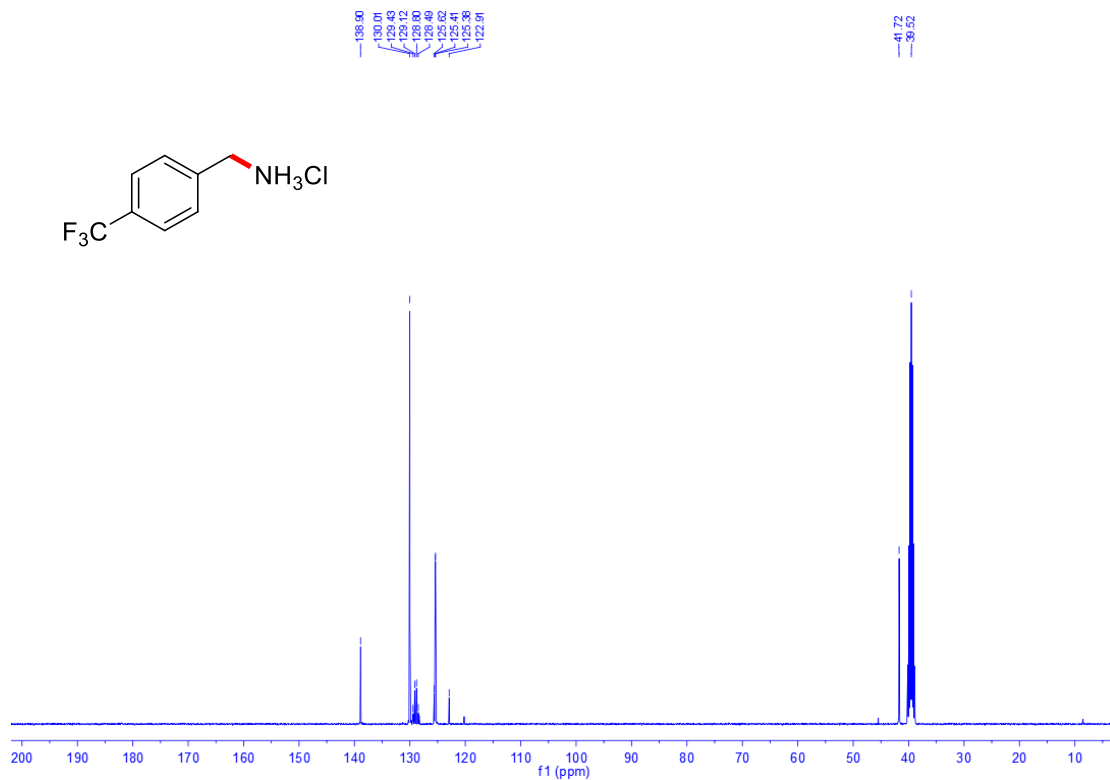

Figure S80.  $^{13}\text{C}\{^1\text{H}\}$  (101 MHz,  $\text{DMSO-}d_6$ , 20 °C) of 5r

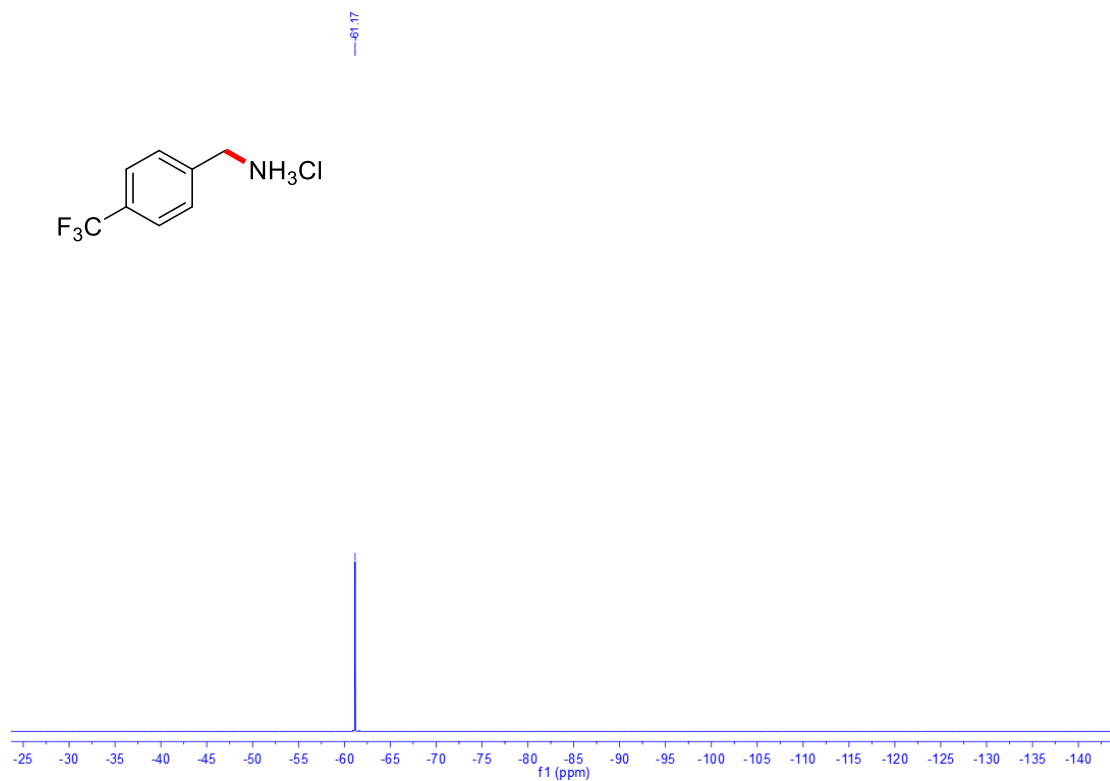

Figure S81.  $^{19}\text{F}$  NMR (377 MHz, DMSO- $d_6$ , 20 °C) of 5r

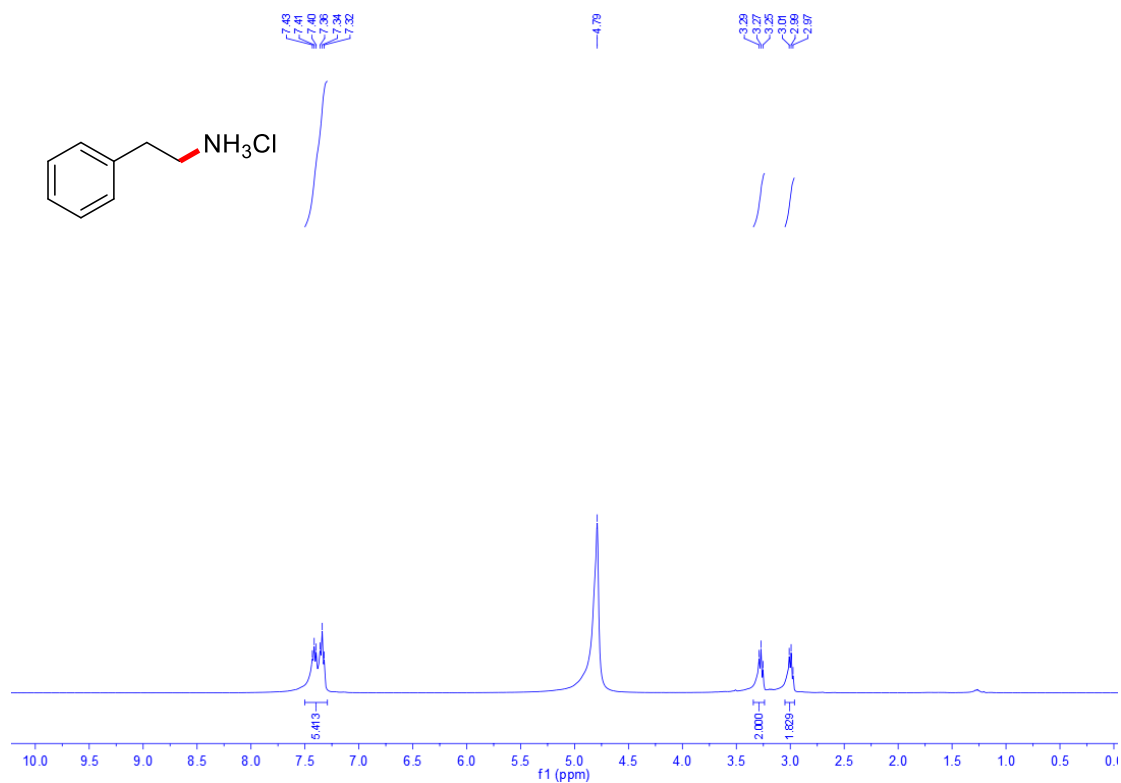

Figure S82.  $^1\text{H}$  NMR (400 MHz, D $_2$ O, 20 °C) of 5s

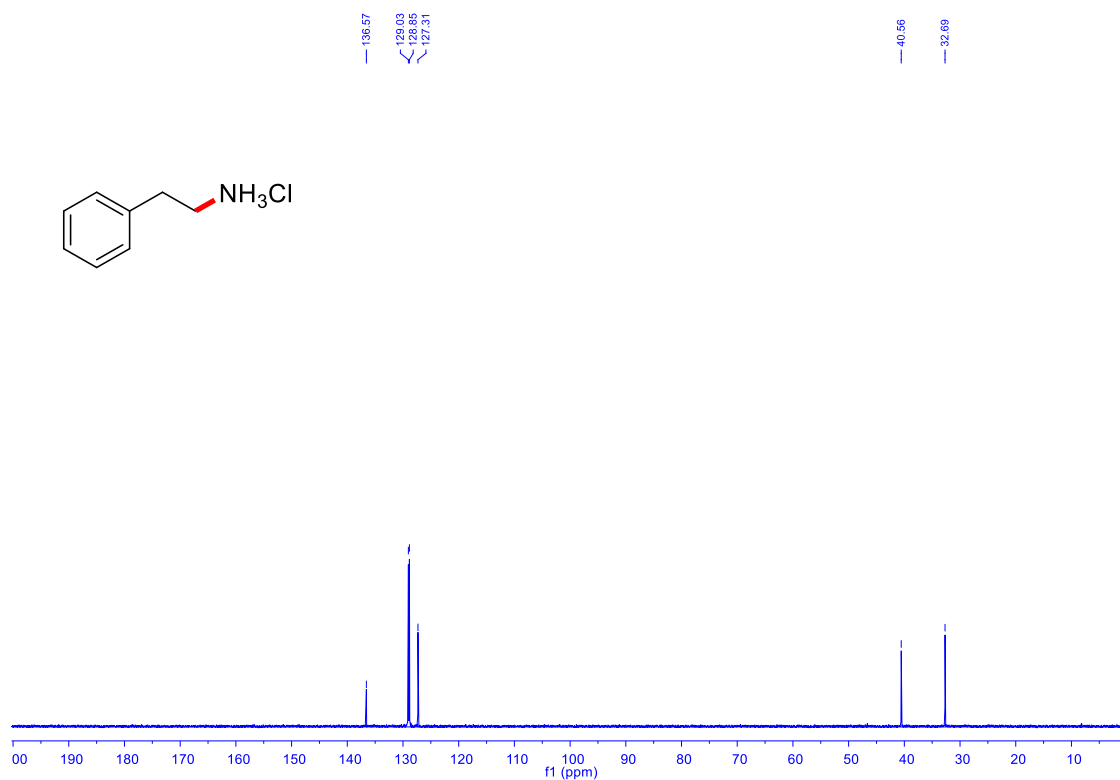

Figure S83.  $^{13}\text{C}\{^1\text{H}\}$  (101 MHz,  $\text{D}_2\text{O}$ , 20 °C) of **5s**

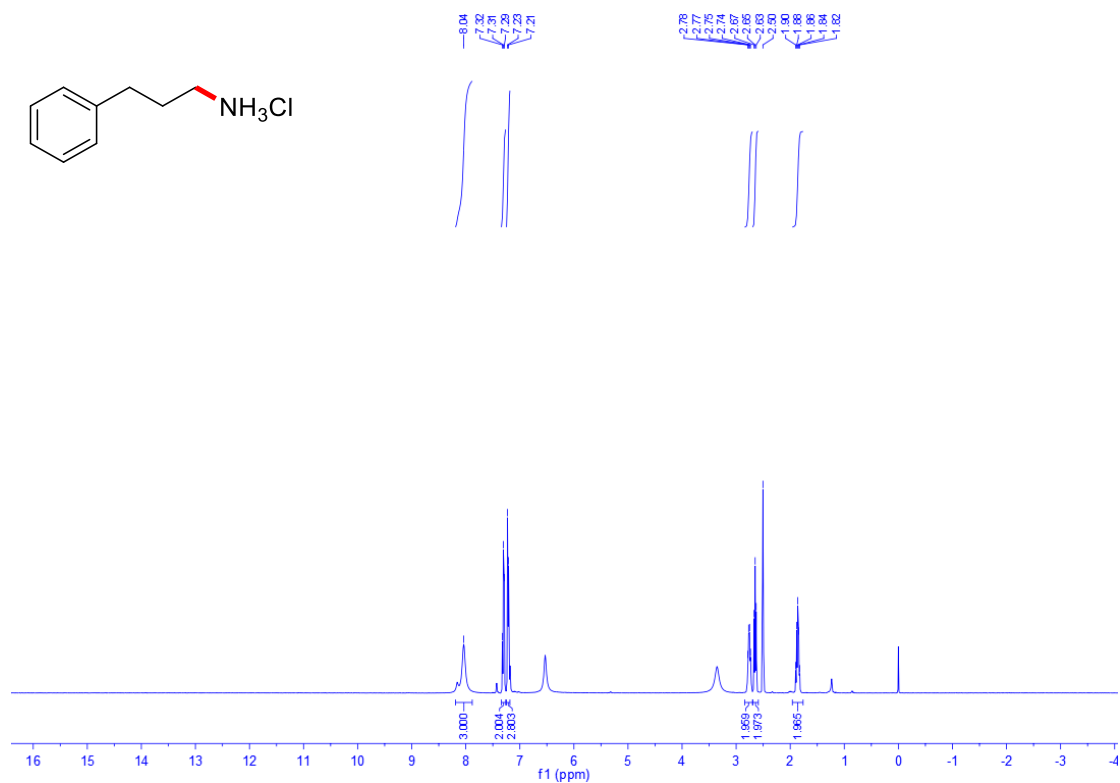

Figure S84.  $^1\text{H}$  NMR (400 MHz,  $\text{DMSO-}d_6$ , 20 °C) of **5t**

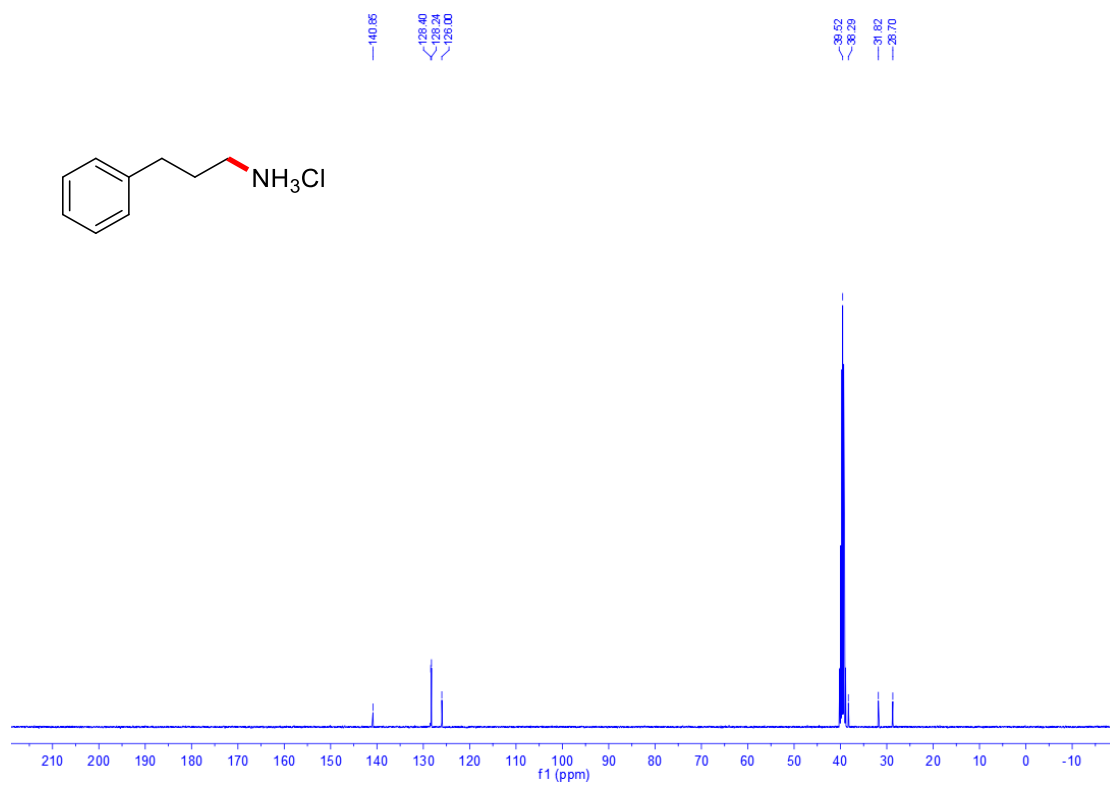

**Figure S85.**  $^{13}\text{C}\{^1\text{H}\}$  (101 MHz, DMSO- $d_6$ , 20 °C) of **5t**
